# Supplementary material for: Vibrio alginolyticus influences quorum sensing-controlled phenotypes of acute hepatopancreatic necrosis disease-causing Vibrio parahaemolyticus
Source: PeerJ. 2021 Jun 1;9:e11567. doi: 10.7717/peerj.11567 (PMC8176930; doi:10.7717/peerj.11567)
Supplement: Supplemental Information 3 [file peerj-09-11567-s003.xlsx]

## Sheet: data3_fc2_&_raw.p
Feature_ID	Chrom	Start	End	Strand	Type	Locus_Tag	Old_Locus_Tag	Entrez_Gene_ID	Gene_Symbol	Protein_ID	Product	treat/control.fc	treat/control.logCPM	treat/control.raw.pval	treat/control.bh.pval	treat.mean	control.mean	N_control	N_treat	control_Read_Count	treat_Read_Count	control_RPKM	treat_RPKM	Query_Length	Query_Start	Query_End	Query_Coverage	Target_Description	Target_Length	Target_Start	Target_End	Target_Coverage	Bit	e-value	Identites	Identites (%)	Positives	Positives (%)	Gaps	Gaps (%)	Query_Frame
gene14	NC_004603.1	13932	14045	+	protein_coding	VP0015	.	1187471	.	NP_796394.1	hypothetical protein	-7.93997	0.830367	0.0433314	0.144567	0.333786	1.73112	1.73112	0.333786	7	1	18.0236	2.57804	114				No hit
gene16	NC_004603.1	14551	14667	+	protein_coding	VP0017	.	1187473	.	NP_796396.1	hypothetical protein	-2.49646	5.21771	3.97876e-06	4.77339e-05	4.46504	5.74669	5.74669	4.46504	159	81	398.896	203.467	117	1	103	88.03	UNIPROTKB|Q9KVX1 - symbol:VC_0017 "Uncharacterized protein" species:243277 "Vibrio cholerae O1 biovar El Tor str. N16961" [GO:0003674 "molecular_function" evidence=ND] [GO:0005575 "cellular_component" evidence=ND] [GO:0008150 "biological_process" evidence=ND] EMBL:AE003852 Proteomes:UP000000584 PIR:C82373 RefSeq:NP_229676.1 RefSeq:WP_000043135.1 STRING:243277.VC0017 DNASU:2614874 EnsemblBacteria:…	38	1	34	89.47	51.2	5e-06	24/34	70	29/34	85	0/34	0	1
gene43	NC_004603.1	42145	45267	-	protein_coding	VP0038	.	1187500	.	NP_796417.1	hypothetical protein	3.70329	10.3736	9.73851e-19	4.49559e-17	11.0284	9.14141	9.14141	11.0284	1701	8020	159.875	754.738	3123	1	3109	99.55	UNIPROTKB|Q9KVI2 - symbol:VC_0164 "Multidrug resistance protein, putative" species:243277 "Vibrio cholerae O1 biovar El Tor str. N16961" [GO:0006855 "drug transmembrane transport" evidence=ISS] [GO:0042493 "response to drug" evidence=ISS] InterPro:IPR001036 Pfam:PF00873 PRINTS:PR00702 GO:GO:0016021 GO:GO:0042493 EMBL:AE003852 Proteomes:UP000000584 GO:GO:0005215 GO:GO:0006855 eggNOG:ENOG4105BZS eg…	1036	1	1036	100	1809.7	0	916/1036	88	991/1036	95	0/1036	0	1
gene44	NC_004603.1	45279	46385	-	protein_coding	VP0039	.	1187501	.	NP_796418.1	hypothetical protein	2.43736	8.24755	4.24515e-09	8.70973e-08	8.75082	7.47013	7.47013	8.75082	532	1651	141.063	438.322	1107	1	1105	99.82	UNIPROTKB|Q9KVI1 - symbol:VC_0165 "Uncharacterized protein" species:243277 "Vibrio cholerae O1 biovar El Tor str. N16961" [GO:0003674 "molecular_function" evidence=ND] [GO:0005575 "cellular_component" evidence=ND] [GO:0008150 "biological_process" evidence=ND] InterPro:IPR006143 GO:GO:0016020 EMBL:AE003852 Proteomes:UP000000584 TIGRFAMs:TIGR01730 GO:GO:0055085 GO:GO:0005215 KO:K03585 InterPro:IPR0…	368	1	368	100	612.1	7e-174	310/368	84	339/368	92	0/368	0	1
gene45	NC_004603.1	46404	46985	-	protein_coding	VP0040	.	1187502	.	NP_796419.1	TetR family transcriptional regulator	2.2842	7.10865	2.47547e-07	3.78176e-06	7.58355	6.40114	6.40114	7.58355	252	733	127.094	370.148	582	22	580	96.05	UNIPROTKB|Q9KVI0 - symbol:VC_0166 "Transcriptional regulator, TetR family" species:243277 "Vibrio cholerae O1 biovar El Tor str. N16961" [GO:0003700 "DNA binding transcription factor activity" evidence=ISS] [GO:0006355 "regulation of transcription, DNA-templated" evidence=ISS] InterPro:IPR001647 InterPro:IPR009057 Pfam:PF00440 PRINTS:PR00455 PROSITE:PS50977 GO:GO:0005829 GO:GO:0006355 GO:GO:00037…	198	13	198	93.94	248.1	1e-64	124/186	66	152/186	81	0/186	0	1
gene70	NC_004603.1	69154	69558	+	protein_coding	VP0060	.	1187527	.	NP_796439.1	hypothetical protein	3.14447	8.50344	5.65481e-14	1.95252e-12	9.10399	7.45658	7.45658	9.10399	527	2110	381.948	1531.16	405	16	316	74.32	UNIPROTKB|Q7CQK1 - symbol:mdtJ "Spermidine export protein MdtJ" species:99287 "Salmonella enterica subsp. enterica serovar Typhimurium str. LT2" [GO:0005887 "integral component of plasma membrane" evidence=IBA] [GO:0015606 "spermidine transmembrane transporter activity" evidence=IBA] [GO:1903711 "spermidine transmembrane transport" evidence=IBA] HAMAP:MF_01598 InterPro:IPR000390 InterPro:IPR02374…	120	5	104	83.33	97.8	1e-19	47/100	47	68/100	68	0/100	0	1
gene71	NC_004603.1	69555	69884	+	protein_coding	VP0061	.	1187528	.	NP_796440.1	hypothetical protein	3.11586	7.5845	7.23885e-13	2.29428e-11	8.18096	6.55143	6.55143	8.18096	280	1111	249.053	989.45	330	1	328	99.39	UNIPROTKB|Q7CQK0 - symbol:mdtI "Spermidine export protein MdtI" species:99287 "Salmonella enterica subsp. enterica serovar Typhimurium str. LT2" [GO:0005887 "integral component of plasma membrane" evidence=IBA] [GO:0015606 "spermidine transmembrane transporter activity" evidence=IBA] [GO:1903711 "spermidine transmembrane transport" evidence=IBA] HAMAP:MF_01597 InterPro:IPR000390 InterPro:IPR02373…	109	1	109	100	94.7	1e-18	47/109	43	72/109	66	0/109	0	1
gene72	NC_004603.1	69959	71755	-	protein_coding	VP0062	.	1187529	.	NP_796441.1	phosphogluconate dehydratase	2.5382	3.95245	0.000403177	0.00307967	4.46504	3.21494	3.21494	4.46504	25	81	4.08357	13.2474	1797	1	1795	99.89	UNIPROTKB|Q9KV69 - symbol:VC_0288 "Phosphogluconate dehydratase" species:243277 "Vibrio cholerae O1 biovar El Tor str. N16961" [GO:0004456 "phosphogluconate dehydratase activity" evidence=ISS;IBA] [GO:0005829 "cytosol" evidence=IBA] [GO:0009082 "branched-chain amino acid biosynthetic process" evidence=IBA] [GO:0009255 "Entner-Doudoroff pathway through 6-phosphogluconate" evidence=ISS] InterPro:IP…	618	21	618	96.76	984.9	6e-286	485/598	81	542/598	90	0/598	0	1
gene77	NC_004603.1	75455	76387	+	protein_coding	VP0067	.	1187534	.	NP_796446.1	LysR family transcriptional regulator	2.99071	4.87485	4.86914e-07	6.89308e-06	5.44929	3.93079	3.93079	5.44929	43	164	13.528	51.6602	933	49	922	93.68	UNIPROTKB|P23841 - symbol:xapR "XapR transcriptional activator" species:83333 "Escherichia coli K-12" [GO:0045893 "positive regulation of transcription, DNA-templated" evidence=ISS;IDA] [GO:0003700 "DNA binding transcription factor activity" evidence=ISS;IDA] InterPro:IPR000847 InterPro:IPR037409 Pfam:PF00126 PRINTS:PR00039 PROSITE:PS50931 Pfam:PF03466 GO:GO:0045893 GO:GO:0003700 EMBL:U00096 EMBL…	294	6	294	98.3	161.4	3e-38	96/291	32	162/291	55	2/291	0	1
gene84	NC_004603.1	86206	86778	+	protein_coding	VP0074	.	1187541	.	NP_796453.1	hypothetical protein	-16.5544	7.66964	1.82248e-53	1.10572e-50	4.59504	8.5891	8.5891	4.59504	1159	89	593.714	45.6488	573	1	217	37.87	UNIPROTKB|Q9KVR5 - symbol:VC_0074 "Uncharacterized protein" species:243277 "Vibrio cholerae O1 biovar El Tor str. N16961" [GO:0003674 "molecular_function" evidence=ND] [GO:0005575 "cellular_component" evidence=ND] [GO:0008150 "biological_process" evidence=ND] EMBL:AE003852 Proteomes:UP000000584 PIR:B82368 RefSeq:NP_229733.1 RefSeq:WP_001884257.1 STRING:243277.VC0074 DNASU:2614857 EnsemblBacteria:…	129	3	78	58.91	64.7	2e-09	33/76	43	47/76	61	4/76	5	1
gene86	NC_004603.1	87793	88218	-	protein_coding	VP0076	.	1187543	.	NP_796455.1	universal stress protein A	2.33123	10.3934	5.7603e-09	1.15396e-07	10.8783	9.65818	9.65818	10.8783	2435	7227	1677.79	4985.89	426	1	424	99.53	TIGR_CMR|VC_0076 - symbol:VC_0076 "universal stress protein A" species:686 "Vibrio cholerae O1 biovar El Tor" [GO:0006950 "response to stress" evidence=ISS] InterPro:IPR006016 Pfam:PF00582 InterPro:IPR006015 InterPro:IPR014729 GO:GO:0005737 EMBL:AE003852 Proteomes:UP000000584 GO:GO:0006950 Gene3D:3.40.50.620 eggNOG:COG0589 KO:K06149 PIRSF:PIRSF006276 PIR:D82368 RefSeq:NP_229735.1 RefSeq:WP_000121…	141	1	141	100	231.9	7e-60	108/141	76	131/141	92	0/141	0	1
gene89	NC_004603.1	89545	90738	+	protein_coding	VP0079	.	1187546	.	NP_796458.1	hypothetical protein	2.13311	5.60268	4.91341e-05	0.000477512	6.04612	4.9768	4.9768	6.04612	92	250	22.6168	61.5361	1194	1	1192	99.83	UNIPROTKB|Q9KVQ9 - symbol:VC_0080 "Uncharacterized protein" species:243277 "Vibrio cholerae O1 biovar El Tor str. N16961" [GO:0003674 "molecular_function" evidence=ND] [GO:0005575 "cellular_component" evidence=ND] [GO:0008150 "biological_process" evidence=ND] Gene3D:3.50.50.60 InterPro:IPR036188 SUPFAM:SSF51905 EMBL:AE003852 Proteomes:UP000000584 eggNOG:ENOG4105CBX eggNOG:COG2081 KO:K07007 Gene3D…	398	4	398	99.25	637.5	2e-181	309/397	77	345/397	86	2/397	0	1
gene90	NC_004603.1	90824	92167	-	protein_coding	VP0080	.	1187547	.	NP_796459.1	sigma-54 interacting response regulator transcription regulator protein	2.13291	8.83661	3.16345e-07	4.73069e-06	9.28164	8.19135	8.19135	9.28164	879	2387	191.972	521.972	1344	220	1336	83.11	TIGR_CMR|GSU_1320 - symbol:GSU_1320 "sigma-54 dependent DNA-binding response regulator" species:243231 "Geobacter sulfurreducens PCA" [GO:0000156 "phosphorelay response regulator activity" evidence=ISS] [GO:0000160 "phosphorelay signal transduction system" evidence=ISS] InterPro:IPR001789 InterPro:IPR002078 InterPro:IPR002197 InterPro:IPR009057 Pfam:PF00072 Pfam:PF00158 Pfam:PF02954 PRINTS:PR0159…	461	80	453	81.13	263.5	7e-69	154/377	40	223/377	59	8/377	2	1
gene94	NC_004603.1	93672	94103	+	protein_coding	VP0084	.	1187551	.	NP_796463.1	hypothetical protein	-2.16331	3.96837	0.00248088	0.0142244	3.4103	4.45146	4.45146	3.4103	63	37	42.806	25.1717	432	7	421	96.06	UNIPROTKB|Q48ID4 - symbol:PSPPH_2657 "Uncharacterized protein" species:264730 "Pseudomonas savastanoi pv. phaseolicola 1448A" [GO:0003674 "molecular_function" evidence=ND] [GO:0005575 "cellular_component" evidence=ND] [GO:0008150 "biological_process" evidence=ND] EMBL:CP000058 Proteomes:UP000000551 InterPro:IPR012312 Pfam:PF01814 HOGENOM:HOG000026447 OMA:AEHHEMD ProteinModelPortal:Q48ID4 STRING:2…	160	15	152	86.25	168.3	1e-40	76/138	55	105/138	76	0/138	0	1
gene97	NC_004603.1	96524	96955	-	protein_coding	VP0087	.	1187554	.	NP_796466.1	hypothetical protein	-5.55208	3.96925	9.19915e-10	2.01385e-08	2.50734	4.76454	4.76454	2.50734	79	18	53.6774	12.2457	432				No hit
gene106	NC_004603.1	105712	106347	+	protein_coding	VP0096	.	1187563	.	NP_796475.1	hypothetical protein	2.32054	6.63463	4.42806e-07	6.36004e-06	7.1159	5.91462	5.91462	7.1159	179	529	82.6122	244.451	636	1	601	94.5	UNIPROTKB|Q9KVQ5 - symbol:VC_0084 "Uncharacterized protein" species:243277 "Vibrio cholerae O1 biovar El Tor str. N16961" [GO:0003674 "molecular_function" evidence=ND] [GO:0005575 "cellular_component" evidence=ND] [GO:0008150 "biological_process" evidence=ND] InterPro:IPR003033 Pfam:PF02036 EMBL:AE003852 Proteomes:UP000000584 Gene3D:3.30.1050.10 InterPro:IPR036527 SUPFAM:SSF55718 eggNOG:ENOG4105J…	207	7	206	96.62	314.7	1e-84	147/200	73	180/200	90	0/200	0	1
gene116	NC_004603.1	112640	112855	-	protein_coding	VP0106	.	1187573	.	NP_796485.1	hypothetical protein	-55.8989	11.6136	3.1067e-113	1.31942e-109	6.7959	12.5883	12.5883	6.7959	18579	423	25247.4	575.547	216				No hit
gene121	NC_004603.1	118504	118782	-	protein_coding	VP0111	.	1187578	.	NP_796490.1	hypothetical protein	-2.86464	11.0371	5.12245e-13	1.63572e-11	10.0879	11.6054	11.6054	10.0879	9399	4177	9888.39	4400.02	279				No hit
gene159	NC_004603.1	158344	158808	+	protein_coding	VP0149	.	1187616	.	NP_796528.1	hypothetical protein	-19.9641	14.4586	6.48543e-76	1.37718e-72	11.0694	15.3881	15.3881	11.0694	129390	8251	81676.3	5214.92	465	1	463	99.57	UNIPROTKB|Q9KNL5 - symbol:VC_2717 "Uncharacterized protein" species:243277 "Vibrio cholerae O1 biovar El Tor str. N16961" [GO:0003674 "molecular_function" evidence=ND] [GO:0005575 "cellular_component" evidence=ND] [GO:0008150 "biological_process" evidence=ND] EMBL:AE003852 Proteomes:UP000000584 PIR:F82042 RefSeq:NP_232344.1 RefSeq:WP_001884046.1 STRING:243277.VC2717 DNASU:2615545 EnsemblBacteria:…	165	10	165	94.55	236.9	2e-61	114/156	73	138/156	88	2/156	1	1
gene193	NC_004603.1	195458	197131	+	protein_coding	VP0183	.	1187650	.	NP_796562.1	methyl-accepting chemotaxis protein	4.86832	7.28276	2.70309e-21	1.4718e-19	8.00939	5.74669	5.74669	8.00939	159	986	27.8798	173.107	1674	7	1672	99.52	UNIPROTKB|Q9KVD0 - symbol:VC_0216 "Methyl-accepting chemotaxis protein" species:243277 "Vibrio cholerae O1 biovar El Tor str. N16961" [GO:0004871 "signal transducer activity" evidence=ISS] [GO:0004872 "receptor activity" evidence=ISS] [GO:0006935 "chemotaxis" evidence=ISS] InterPro:IPR003660 InterPro:IPR004089 InterPro:IPR004090 Pfam:PF00015 Pfam:PF00672 PRINTS:PR00260 PROSITE:PS50111 PROSITE:PS5…	564	10	564	98.4	660.2	3e-188	372/555	67	437/555	78	0/555	0	1
gene266	NC_004603.1	267445	267756	+	protein_coding	VP0256	.	1187723	rpsJ	NP_796635.1	30S ribosomal protein S10	-2.02362	12.2636	8.95529e-07	1.22293e-05	11.6676	12.6843	12.6843	11.6676	19858	12493	18682.2	11768.1	312	1	310	99.36	UNIPROTKB|Q9KNY3 - symbol:rpsJ "30S ribosomal protein S10" species:243277 "Vibrio cholerae O1 biovar El Tor str. N16961" [GO:0003735 "structural constituent of ribosome" evidence=ISS;IBA] [GO:0006412 "translation" evidence=ISS] [GO:0015935 "small ribosomal subunit" evidence=IBA] HAMAP:MF_00508 InterPro:IPR001848 InterPro:IPR018268 PRINTS:PR00971 PROSITE:PS00361 Pfam:PF00338 GO:GO:0003723 GO:GO:00…	103	1	103	100	199.5	3e-50	102/103	99	102/103	99	0/103	0	1
gene285	NC_004603.1	275994	276170	+	protein_coding	VP0275	.	1187742	rpmD	NP_796654.1	50S ribosomal protein L30	2.26558	7.48737	1.69418e-07	2.64529e-06	7.95897	6.78614	6.78614	7.95897	330	952	547.254	1580.73	177	1	175	98.87	UNIPROTKB|Q9KP02 - symbol:rpmD "50S ribosomal protein L30" species:243277 "Vibrio cholerae O1 biovar El Tor str. N16961" [GO:0003735 "structural constituent of ribosome" evidence=ISS] [GO:0006412 "translation" evidence=ISS] [GO:0022625 "cytosolic large ribosomal subunit" evidence=IBA] InterPro:IPR005996 PIRSF:PIRSF002211 Pfam:PF00327 GO:GO:0006412 EMBL:AE003852 Proteomes:UP000000584 GO:GO:0003735…	58	1	58	100	118.6	4e-26	58/58	100	58/58	100	0/58	0	1
gene302	NC_004603.1	289269	290177	+	protein_coding	VP0292	.	1187759	.	NP_796671.1	sulfate adenylyltransferase	2.65108	7.05321	1.94247e-09	4.1665e-08	7.58941	6.1947	6.1947	7.58941	218	736	70.3948	237.962	909	1	907	99.78	UNIPROTKB|Q9KP19 - symbol:cysD "Sulfate adenylyltransferase subunit 2" species:243277 "Vibrio cholerae O1 biovar El Tor str. N16961" [GO:0004781 "sulfate adenylyltransferase (ATP) activity" evidence=ISS] [GO:0006790 "sulfur compound metabolic process" evidence=ISS] HAMAP:MF_00064 InterPro:IPR002500 InterPro:IPR011784 Pfam:PF01507 PIRSF:PIRSF002936 UniPathway:UPA00140 InterPro:IPR014729 GO:GO:0005…	302	1	302	100	576.2	3e-163	279/302	92	291/302	96	0/302	0	1
gene303	NC_004603.1	290196	291626	+	protein_coding	VP0293	.	1187760	cysN	NP_796672.1	sulfate adenylyltransferase	3.52884	7.10422	2.11099e-14	7.53394e-13	7.74106	5.9382	5.9382	7.74106	182	818	37.3319	167.999	1431	1	1426	99.65	UNIPROTKB|Q9KP20 - symbol:cysN "Sulfate adenylyltransferase subunit 1" species:243277 "Vibrio cholerae O1 biovar El Tor str. N16961" [GO:0003924 "GTPase activity" evidence=IBA] [GO:0004781 "sulfate adenylyltransferase (ATP) activity" evidence=ISS] [GO:0005622 "intracellular" evidence=IBA] [GO:0006790 "sulfur compound metabolic process" evidence=ISS;IBA] [GO:0006412 "translation" evidence=IBA] HAM…	476	1	475	99.79	793.1	3e-228	392/475	82	436/475	91	0/475	0	1
gene304	NC_004603.1	291691	291801	-	protein_coding	VP0294	.	1187761	.	NP_796673.1	hypothetical protein	5.03175	2.78248	7.45732e-05	0.000693025	3.47928	1.5794	1.5794	3.47928	6	39	15.8663	103.261	111				No hit
gene305	NC_004603.1	291858	293582	+	protein_coding	VP0295	.	1187762	.	NP_796674.1	sodium/sulfate symporter	4.35665	6.0982	2.18515e-15	8.51406e-14	6.79251	4.71078	4.71078	6.79251	76	422	12.9322	71.8981	1725	28	1723	98.32	UNIPROTKB|Q482Z8 - symbol:CPS_2144 "Putative transporter" species:167879 "Colwellia psychrerythraea 34H" [GO:0015137 "citrate transmembrane transporter activity" evidence=ISM] [GO:0015746 "citrate transport" evidence=ISM] InterPro:IPR004680 InterPro:IPR006037 InterPro:IPR036721 Pfam:PF02080 Pfam:PF03600 PROSITE:PS51202 GO:GO:0016021 GO:GO:0006813 EMBL:CP000083 Proteomes:UP000000547 GO:GO:0008324 …	575	7	575	98.96	437.6	3e-121	238/570	41	353/570	61	6/570	1	1
gene310	NC_004603.1	296035	297294	-	protein_coding	VP0300	.	1187767	.	NP_796679.1	hypothetical protein	2.47627	8.20301	2.647e-09	5.56526e-08	8.71283	7.40955	7.40955	8.71283	510	1608	118.809	375.068	1260	1	1258	99.84	UNIPROTKB|Q9KP25 - symbol:VC_2554 "Uncharacterized protein" species:243277 "Vibrio cholerae O1 biovar El Tor str. N16961" [GO:0003674 "molecular_function" evidence=ND] [GO:0005575 "cellular_component" evidence=ND] [GO:0008150 "biological_process" evidence=ND] InterPro:IPR003838 Pfam:PF02687 GO:GO:0016021 GO:GO:0005886 EMBL:AE003852 Proteomes:UP000000584 InterPro:IPR025857 Pfam:PF12704 eggNOG:COG0…	421	3	421	99.52	691.4	1e-197	346/419	82	383/419	91	0/419	0	1
gene311	NC_004603.1	297291	298019	-	protein_coding	VP0301	.	1187768	.	NP_796680.1	ABC transporter ATP-binding protein	5.04094	7.61701	5.98978e-23	3.63409e-21	8.35278	6.03617	6.03617	8.35278	195	1252	78.5155	504.744	729	4	718	98.08	UNIPROTKB|Q9KP26 - symbol:VC_2553 "ABC transporter, ATP-binding protein, authentic frameshift" species:243277 "Vibrio cholerae O1 biovar El Tor str. N16961" [GO:0006810 "transport" evidence=ISS] [GO:0042626 "ATPase activity, coupled to transmembrane movement of substances" evidence=ISS] InterPro:IPR003439 Pfam:PF00005 PROSITE:PS50893 InterPro:IPR003593 InterPro:IPR027417 SUPFAM:SSF52540 GO:GO:000…	238	6	238	97.9	297.4	2e-79	146/238	61	190/238	79	5/238	2	1
gene312	NC_004603.1	298084	298713	-	protein_coding	VP0302	.	1187769	.	NP_796681.1	hypothetical protein	4.4186	5.95663	4.61133e-15	1.70298e-13	6.65394	4.55679	4.55679	6.65394	68	383	31.6823	178.67	630	16	625	96.83	UNIPROTKB|Q9KP27 - symbol:VC_2552 "Uncharacterized protein" species:243277 "Vibrio cholerae O1 biovar El Tor str. N16961" [GO:0003674 "molecular_function" evidence=ND] [GO:0005575 "cellular_component" evidence=ND] [GO:0008150 "biological_process" evidence=ND] EMBL:AE003852 Proteomes:UP000000584 PIR:H82061 RefSeq:NP_232180.1 RefSeq:WP_000559203.1 STRING:243277.VC2552 DNASU:2615569 EnsemblBacteria:…	242	6	242	97.93	145.2	1e-33	124/237	52	153/237	64	34/237	14	1
gene313	NC_004603.1	298842	299141	-	protein_coding	VP0303	.	1187770	.	NP_796682.1	hypothetical protein	3.07268	5.37235	1.59521e-08	2.97143e-07	5.95825	4.38436	4.38436	5.95825	60	235	58.7054	230.219	300	46	289	81.33	UNIPROTKB|Q9KP28 - symbol:VC_2551 "Uncharacterized protein" species:243277 "Vibrio cholerae O1 biovar El Tor str. N16961" [GO:0003674 "molecular_function" evidence=ND] [GO:0005575 "cellular_component" evidence=ND] [GO:0008150 "biological_process" evidence=ND] GO:GO:0016021 EMBL:AE003852 Proteomes:UP000000584 PIR:G82061 RefSeq:NP_232179.1 RefSeq:WP_001883906.1 STRING:243277.VC2551 DNASU:2615568 En…	101	19	99	80.2	59.7	3e-08	34/83	40	47/83	56	4/83	4	1
gene325	NC_004603.1	310908	311546	+	protein_coding	VP0315	.	1187782	.	NP_796694.1	aromatic acid decarboxylase	2.67336	8.11201	1.47556e-10	3.58098e-09	8.65252	7.23963	7.23963	8.65252	453	1542	208.087	709.214	639	22	634	95.93	UNIPROTKB|Q9KP38 - symbol:ubiX "Flavin prenyltransferase UbiX" species:243277 "Vibrio cholerae O1 biovar El Tor str. N16961" [GO:0006744 "ubiquinone biosynthetic process" evidence=ISS] [GO:0008694 "3-octaprenyl-4-hydroxybenzoate carboxy-lyase activity" evidence=ISS] HAMAP:MF_01984 InterPro:IPR003382 InterPro:IPR036551 Pfam:PF02441 InterPro:IPR004507 GO:GO:0006744 EMBL:AE003852 Proteomes:UP0000005…	211	4	207	96.68	358.2	1e-97	176/204	86	188/204	92	0/204	0	1
gene326	NC_004603.1	311793	312785	+	protein_coding	VP0316	.	1187783	tbpA	NP_796695.1	thiamine transporter substrate binding subunit	2.06734	6.50457	1.37977e-05	0.000149487	6.93437	5.89868	5.89868	6.93437	177	466	52.3205	137.921	993	1	991	99.8	UNIPROTKB|Q9KP40 - symbol:VC_2539 "Thiamin ABC transporter, periplasmic thiamin-binding protein" species:243277 "Vibrio cholerae O1 biovar El Tor str. N16961" [GO:0015234 "thiamine transmembrane transporter activity" evidence=ISS] [GO:0015888 "thiamine transport" evidence=ISS] [GO:0042626 "ATPase activity, coupled to transmembrane movement of substances" evidence=ISS] InterPro:IPR005948 InterPro:…	330	1	330	100	546.6	3e-154	260/330	78	294/330	89	0/330	0	1
gene336	NC_004603.1	321790	321984	+	protein_coding	VP0326	.	1187793	.	NP_796705.1	hypothetical protein	-2.60161	9.67404	7.23417e-11	1.82878e-09	8.82805	10.2056	10.2056	8.82805	3560	1742	5358.75	2625.47	195				No hit
gene339	NC_004603.1	323637	323894	+	protein_coding	VP0329	.	1187796	rpmA	NP_796708.1	50S ribosomal protein L27	-2.11166	8.74433	4.44768e-07	6.36004e-06	8.11069	9.18642	9.18642	8.11069	1755	1058	1996.67	1205.2	258	1	253	98.06	UNIPROTKB|Q8EB81 - symbol:rpmA "50S ribosomal protein L27" species:211586 "Shewanella oneidensis MR-1" [GO:0003735 "structural constituent of ribosome" evidence=IBA] [GO:0022625 "cytosolic large ribosomal subunit" evidence=IBA] HAMAP:MF_00539 InterPro:IPR001684 InterPro:IPR018261 Pfam:PF01016 PRINTS:PR00063 ProDom:PD003114 PROSITE:PS00831 GO:GO:0006412 EMBL:AE014299 Proteomes:UP000008186 GO:GO:00…	84	1	84	100	162.2	4e-39	79/84	94	82/84	97	0/84	0	1
gene352	NC_004603.1	336217	336819	-	protein_coding	VP0342	.	1187809	leuD	NP_796721.1	3-isopropylmalate dehydratase small subunit	2.33516	7.39044	7.67276e-08	1.26795e-06	7.87507	6.65943	6.65943	7.87507	302	898	147.007	437.676	603	1	601	99.67	UNIPROTKB|Q9KP80 - symbol:leuD "3-isopropylmalate dehydratase small subunit" species:243277 "Vibrio cholerae O1 biovar El Tor str. N16961" [GO:0003861 "3-isopropylmalate dehydratase activity" evidence=ISS] [GO:0009098 "leucine biosynthetic process" evidence=ISS] [GO:0009316 "3-isopropylmalate dehydratase complex" evidence=ISS] HAMAP:MF_01031 InterPro:IPR000573 InterPro:IPR004431 Pfam:PF00694 UniP…	200	1	200	100	361.7	9e-99	176/200	88	183/200	91	0/200	0	1
gene358	NC_004603.1	342567	343115	+	protein_coding	VP0348	.	1187815	.	NP_796727.1	hypothetical protein	-2.26614	4.01241	0.00105353	0.00699663	3.4103	4.51557	4.51557	3.4103	66	37	35.2874	19.8072	549	40	541	91.44	UNIPROTKB|Q9KP85 - symbol:VC_2488 "Uncharacterized protein" species:243277 "Vibrio cholerae O1 biovar El Tor str. N16961" [GO:0003674 "molecular_function" evidence=ND] [GO:0005575 "cellular_component" evidence=ND] [GO:0008150 "biological_process" evidence=ND] InterPro:IPR000326 Pfam:PF01569 GO:GO:0016021 EMBL:AE003852 Proteomes:UP000000584 SMART:SM00014 InterPro:IPR036938 SUPFAM:SSF48317 KO:K1930…	178	8	174	93.82	234.6	1e-60	110/167	65	135/167	80	0/167	0	1
gene362	NC_004603.1	348280	350004	+	protein_coding	VP0352	.	1187819	.	NP_796731.1	acetolactate synthase 3 catalytic subunit	3.23251	10.8754	1.27055e-15	5.09059e-14	11.4863	9.79471	9.79471	11.4863	2677	11017	455.52	1877.02	1725	10	1723	99.36	UNIPROTKB|Q9KP90 - symbol:VC_2483 "Acetolactate synthase" species:243277 "Vibrio cholerae O1 biovar El Tor str. N16961" [GO:0003984 "acetolactate synthase activity" evidence=ISS] [GO:0009097 "isoleucine biosynthetic process" evidence=ISS] [GO:0009099 "valine biosynthetic process" evidence=ISS] InterPro:IPR000399 InterPro:IPR011766 InterPro:IPR012000 InterPro:IPR012001 InterPro:IPR012846 Pfam:PF00…	573	3	573	99.65	1015.8	3e-295	495/571	86	535/571	93	0/571	0	1
gene363	NC_004603.1	350006	350500	+	protein_coding	VP0353	.	1187820	ilvH	NP_796732.1	acetolactate synthase small subunit	2.61403	9.64459	6.42518e-11	1.66389e-09	10.1769	8.79257	8.79257	10.1769	1335	4443	791.634	2637.94	495	1	490	98.99	UNIPROTKB|Q9KP91 - symbol:VC_2482 "Acetolactate synthase III, small subunit" species:243277 "Vibrio cholerae O1 biovar El Tor str. N16961" [GO:0003984 "acetolactate synthase activity" evidence=ISS] [GO:0009097 "isoleucine biosynthetic process" evidence=ISS] [GO:0009099 "valine biosynthetic process" evidence=ISS] InterPro:IPR004789 InterPro:IPR002912 GO:GO:0005829 EMBL:AE003852 Proteomes:UP0000005…	164	1	163	99.39	292.7	4e-78	153/163	93	160/163	98	0/163	0	1
gene388	NC_004603.1	379278	379553	+	protein_coding	VP0378	.	1187845	.	NP_796757.1	hypothetical protein	-19.1073	1.73275	8.08043e-05	0.000741201	0.333786	2.72987	2.72987	0.333786	17	1	18.0796	1.06484	276				No hit
gene424	NC_004603.1	412499	413302	+	protein_coding	VP0413	.	1187881	uppP	NP_796792.1	undecaprenyl pyrophosphate phosphatase	2.34435	6.31404	7.74036e-07	1.07429e-05	6.79927	5.58677	5.58677	6.79927	142	424	51.8419	154.99	804	1	799	99.38	TIGR_CMR|VC_0526 - symbol:VC_0526 "undecaprenol kinase, putative" species:686 "Vibrio cholerae O1 biovar El Tor" [GO:0009038 "undecaprenol kinase activity" evidence=ISS] [GO:0046677 "response to antibiotic" evidence=ISS] HAMAP:MF_01006 InterPro:IPR003824 Pfam:PF02673 GO:GO:0016021 GO:GO:0005886 GO:GO:0016311 GO:GO:0008360 EMBL:AE003852 Proteomes:UP000000584 GO:GO:0046677 GO:GO:0071555 GO:GO:00092…	267	1	266	99.63	459.5	4e-128	228/266	85	252/266	94	0/266	0	1
gene433	NC_004603.1	422575	423903	+	protein_coding	VP0421	.	1187890	.	NP_796801.1	methyl-accepting chemotaxis protein	-2.52729	6.07379	1.31032e-07	2.07646e-06	5.28563	6.60153	6.60153	5.28563	290	146	64.0503	32.2866	1329	49	1327	96.24	UNIPROTKB|Q9KPD3 - symbol:VC_2439 "Methyl-accepting chemotaxis protein" species:243277 "Vibrio cholerae O1 biovar El Tor str. N16961" [GO:0004871 "signal transducer activity" evidence=ISS] [GO:0004872 "receptor activity" evidence=ISS] [GO:0006935 "chemotaxis" evidence=ISS] InterPro:IPR003660 InterPro:IPR004089 InterPro:IPR004090 Pfam:PF00015 PRINTS:PR00260 PROSITE:PS50111 PROSITE:PS50885 SMART:SM…	433	8	433	98.38	468	2e-130	326/426	76	363/426	85	0/426	0	1
gene475	NC_004603.1	467011	468240	+	protein_coding	VP0464	.	1187932	.	NP_796843.1	cell division protein FtsZ	-3.73508	11.6968	3.20454e-19	1.54656e-17	10.4544	12.3548	12.3548	10.4544	15802	5386	3770.99	1286.93	1230	1	1228	99.84	TIGR_CMR|VC_2397 - symbol:VC_2397 "cell division protein FtsZ" species:686 "Vibrio cholerae O1 biovar El Tor" [GO:0000910 "cytokinesis" evidence=ISS] HAMAP:MF_00909 InterPro:IPR000158 InterPro:IPR003008 InterPro:IPR020805 Pfam:PF00091 PRINTS:PR00423 PROSITE:PS01134 PROSITE:PS01135 SMART:SM00864 InterPro:IPR008280 InterPro:IPR018316 InterPro:IPR036525 GO:GO:0005525 GO:GO:0005737 GO:GO:0051301 GO:G…	398	1	398	100	645.2	8e-184	346/415	83	362/415	87	23/415	5	1
gene476	NC_004603.1	468342	469259	+	protein_coding	VP0465	.	1187933	lpxC	NP_796844.1	UDP-3-O-[3-hydroxymyristoyl] N-acetylglucosamine deacetylase	-2.01675	11.2477	1.08685e-06	1.44698e-05	10.6554	11.667	11.667	10.6554	9809	6192	3136.39	1982.36	918	1	916	99.78	UNIPROTKB|Q9KPH2 - symbol:lpxC "UDP-3-O-acyl-N-acetylglucosamine deacetylase" species:243277 "Vibrio cholerae O1 biovar El Tor str. N16961" [GO:0008759 "UDP-3-O-[3-hydroxymyristoyl] N-acetylglucosamine deacetylase activity" evidence=ISS] [GO:0009245 "lipid A biosynthetic process" evidence=ISS] HAMAP:MF_00388 InterPro:IPR004463 InterPro:IPR011334 InterPro:IPR015870 Pfam:PF03331 GO:GO:0046872 EMBL:…	305	1	305	100	577	2e-163	284/305	93	294/305	96	0/305	0	1
gene508	NC_004603.1	513386	513763	-	protein_coding	VP0497	.	1187965	.	NP_796876.1	autonomous glycyl radical cofactor GrcA	3.6216	8.38438	7.96207e-17	3.41565e-15	9.03121	7.18153	7.18153	9.03121	435	2006	337.789	1559.67	378	1	376	99.47	UNIPROTKB|Q9KPK6 - symbol:grcA "Autonomous glycyl radical cofactor" species:243277 "Vibrio cholerae O1 biovar El Tor str. N16961" [GO:0005829 "cytosol" evidence=IBA] [GO:0006567 "threonine catabolic process" evidence=IBA] [GO:0008150 "biological_process" evidence=ND] [GO:0008861 "formate C-acetyltransferase activity" evidence=IBA] InterPro:IPR001150 Pfam:PF01228 PROSITE:PS51149 EMBL:AE003852 Prot…	125	1	125	100	227.3	2e-58	113/125	90	121/125	96	0/125	0	1
gene512	NC_004603.1	516036	516605	+	protein_coding	VP0501	.	1187969	.	NP_796880.1	hypothetical protein	2.33593	7.25639	9.23034e-08	1.49623e-06	7.74106	6.52572	6.52572	7.74106	275	818	141.614	421.767	570	13	565	97.02	UNIPROTKB|Q9KPK9 - symbol:VC_2358 "Uncharacterized protein" species:243277 "Vibrio cholerae O1 biovar El Tor str. N16961" [GO:0003674 "molecular_function" evidence=ND] [GO:0005575 "cellular_component" evidence=ND] [GO:0008150 "biological_process" evidence=ND] EMBL:AE003852 Proteomes:UP000000584 InterPro:IPR012312 Pfam:PF01814 eggNOG:COG3945 PIR:B82086 ProteinModelPortal:Q9KPK9 STRING:243277.VC235…	213	29	212	86.38	259.6	4e-68	121/184	65	152/184	82	0/184	0	1
gene526	NC_004603.1	533106	533357	+	protein_coding	VP0515	.	1187983	.	NP_796894.1	hypothetical protein	-4.00637	9.7089	1.52494e-20	7.8981e-19	8.38908	10.3883	10.3883	8.38908	4041	1284	4706.92	1497.47	252	1	250	99.21	UNIPROTKB|Q9KU58 - symbol:VC_0666 "Uncharacterized protein" species:243277 "Vibrio cholerae O1 biovar El Tor str. N16961" [GO:0003674 "molecular_function" evidence=ND] [GO:0005575 "cellular_component" evidence=ND] [GO:0008150 "biological_process" evidence=ND] EMBL:AE003852 Proteomes:UP000000584 PIR:B82294 STRING:243277.VC0666 DNASU:2615455 EnsemblBacteria:AAF93831 OMA:IPWGNEY BioCyc:VCHO:VC0666-M…	104	22	104	79.81	115.2	6e-25	55/83	66	67/83	80	0/83	0	1
gene537	NC_004603.1	543172	544320	-	protein_coding	VP0526	.	1187994	.	NP_796905.1	NptA protein	-2.76094	8.49022	1.70401e-11	4.66898e-10	7.58551	9.04604	9.04604	7.58551	1592	734	406.697	187.746	1149	1	1144	99.56	UNIPROTKB|H9L4N7 - symbol:VC_0676 "NptA protein" species:243277 "Vibrio cholerae O1 biovar El Tor str. N16961" [GO:0005315 "inorganic phosphate transmembrane transporter activity" evidence=IBA] [GO:0005436 "sodium:phosphate symporter activity" evidence=IBA] [GO:0005737 "cytoplasm" evidence=IBA] [GO:0005886 "plasma membrane" evidence=IBA] [GO:0015321 "sodium-dependent phosphate transmembrane trans…	382	1	381	99.74	645.6	6e-184	329/381	86	361/381	94	0/381	0	1
gene542	NC_004603.1	546383	546643	-	protein_coding	VP0531	.	1187999	rpsT	NP_796910.1	30S ribosomal protein S20	-2.18303	10.8618	6.53227e-08	1.09654e-06	10.1924	11.3181	11.3181	10.1924	7701	4491	8660.74	5057.04	261	1	259	99.23	UNIPROTKB|O34239 - symbol:rpsT "30S ribosomal protein S20" species:243277 "Vibrio cholerae O1 biovar El Tor str. N16961" [GO:0003735 "structural constituent of ribosome" evidence=ISS] [GO:0006412 "translation" evidence=ISS] HAMAP:MF_00500 InterPro:IPR002583 InterPro:IPR036510 Pfam:PF01649 ProDom:PD004231 GO:GO:0006412 EMBL:AE003852 Proteomes:UP000000584 GO:GO:0005840 GO:GO:0003735 GO:GO:0019843 E…	86	1	86	100	154.1	1e-36	80/86	93	82/86	95	0/86	0	1
gene587	NC_004603.1	592203	592892	+	protein_coding	VP0569	.	1188044	.	NP_796948.1	DNA-binding response regulator PhoB	-2.81256	7.88869	2.18303e-11	5.83103e-10	6.96776	8.45247	8.45247	6.96776	1054	477	448.373	203.172	690	1	688	99.71	UNIPROTKB|Q9KU11 - symbol:VC_0719 "DNA-binding response regulator PhoB" species:243277 "Vibrio cholerae O1 biovar El Tor str. N16961" [GO:0000156 "phosphorelay response regulator activity" evidence=ISS] [GO:0000160 "phosphorelay signal transduction system" evidence=ISS] InterPro:IPR001789 InterPro:IPR001867 InterPro:IPR011879 Pfam:PF00072 Pfam:PF00486 PROSITE:PS50110 PROSITE:PS51755 SMART:SM00448…	229	1	229	100	443	3e-123	220/229	96	226/229	98	0/229	0	1
gene596	NC_004603.1	604523	605299	-	protein_coding	VP0578	.	1188053	.	NP_796957.1	hypothetical protein	2.01692	5.87791	9.33279e-05	0.000841536	6.29599	5.30171	5.30171	6.29599	116	298	43.8213	112.717	777	1	775	99.74	UNIPROTKB|Q9KU02 - symbol:VC_0728 "Uncharacterized protein" species:243277 "Vibrio cholerae O1 biovar El Tor str. N16961" [GO:0003674 "molecular_function" evidence=ND] [GO:0005575 "cellular_component" evidence=ND] [GO:0008150 "biological_process" evidence=ND] InterPro:IPR022486 InterPro:IPR027417 SUPFAM:SSF52540 EMBL:AE003852 Proteomes:UP000000584 GO:GO:0008976 eggNOG:ENOG4105CSR eggNOG:COG2326 O…	258	1	258	100	455.3	7e-127	212/258	82	237/258	91	0/258	0	1
gene615	NC_004603.1	623646	624029	+	protein_coding	VP0597	.	1188072	.	NP_796976.1	scaffold protein	-2.52632	9.53173	2.7749e-10	6.51106e-09	8.71641	10.0514	10.0514	8.71641	3199	1612	2445.3	1233.75	384	1	379	98.7	UNIPROTKB|Q9KTY1 - symbol:VC_0749 "Iron-sulfur cluster assembly scaffold protein IscU" species:243277 "Vibrio cholerae O1 biovar El Tor str. N16961" [GO:0005737 "cytoplasm" evidence=IBA] [GO:0006879 "cellular iron ion homeostasis" evidence=IBA] [GO:0008150 "biological_process" evidence=ND] [GO:0008198 "ferrous iron binding" evidence=IBA] [GO:0036455 "iron-sulfur transferase activity" evidence=IBA…	127	1	126	99.21	250.8	1e-65	123/126	97	126/126	100	0/126	0	1
gene707	NC_004603.1	721356	722117	+	protein_coding	VP0689	.	1188164	.	NP_797068.1	flagellar motor protein PomA	-3.55725	7.41849	2.32818e-15	8.98891e-14	6.24738	8.06493	8.06493	6.24738	805	288	310.091	111.079	762	1	760	99.74	UNIPROTKB|O06873 - symbol:pomA "Chemotaxis protein PomA" species:663 "Vibrio alginolyticus" [GO:0005515 "protein binding" evidence=IPI] Pfam:PF01618 Prosite:PS01307 GO:GO:0008565 GO:GO:0006935 GO:GO:0015992 GO:GO:0097588 InterPro:IPR002898 eggNOG:COG1291 InterPro:IPR000540 eggNOG:ENOG4105E14 GO:GO:0120101 EMBL:AB004068 RefSeq:WP_005381564.1 SMR:O06873 IntAct:O06873 TCDB:1.A.30.1.2 GeneID:31649840…	253	1	253	100	458	1e-127	236/253	93	243/253	96	0/253	0	1
gene713	NC_004603.1	727281	728372	+	protein_coding	VP0695	.	1188170	.	NP_797074.1	23S rRNA (cytidine(2498)-2'-O)-methyltransferase RlmM	2.04325	6.67513	1.42508e-05	0.000154003	7.09956	6.07923	6.07923	7.09956	201	523	54.0283	140.758	1092	1	1066	97.62	UNIPROTKB|P0ADR6 - symbol:rlmM "23S rRNA 2'-O-ribose C2498 methyltransferase" species:83333 "Escherichia coli K-12" [GO:0070677 "rRNA (cytosine-2'-O-)-methyltransferase activity" evidence=IDA] [GO:0000453 "enzyme-directed rRNA 2'-O-methylation" evidence=IMP] HAMAP:MF_01551 InterPro:IPR002877 InterPro:IPR011224 Pfam:PF01728 PIRSF:PIRSF028774 InterPro:IPR029063 GO:GO:0005737 EMBL:U00096 EMBL:AP0090…	366	1	353	96.45	475.7	7e-133	224/355	63	277/355	78	2/355	0	1
gene740	NC_004603.1	756896	758821	-	protein_coding	VP0722	.	1188197	.	NP_797101.1	penicillin-binding protein 2	2.3473	5.84396	2.91172e-06	3.59479e-05	6.32906	5.12117	5.12117	6.32906	102	305	15.5451	46.5412	1926	10	1918	99.12	UNIPROTKB|Q9KTF2 - symbol:VC_0950 "Penicillin-binding protein 2" species:243277 "Vibrio cholerae O1 biovar El Tor str. N16961" [GO:0003824 "catalytic activity" evidence=ISS] [GO:0009252 "peptidoglycan biosynthetic process" evidence=ISS] InterPro:IPR001460 InterPro:IPR005311 InterPro:IPR017790 InterPro:IPR036138 Pfam:PF00905 Pfam:PF03717 UniPathway:UPA00219 GO:GO:0005887 GO:GO:0003824 GO:GO:000836…	638	3	635	99.22	1017.7	9e-296	479/636	75	559/636	87	3/636	0	1
gene746	NC_004603.1	764202	764672	+	protein_coding	VP0728	.	1188203	.	NP_797107.1	hypothetical protein	2.29084	8.03986	5.59104e-08	9.5362e-07	8.51658	7.3256	7.3256	8.51658	481	1403	299.759	875.449	471	1	469	99.58	UNIPROTKB|Q9KTE5 - symbol:VC_0957 "Uncharacterized protein" species:243277 "Vibrio cholerae O1 biovar El Tor str. N16961" [GO:0003674 "molecular_function" evidence=ND] [GO:0005575 "cellular_component" evidence=ND] [GO:0008150 "biological_process" evidence=ND] EMBL:AE003852 Proteomes:UP000000584 PIR:H82260 RefSeq:NP_230604.1 RefSeq:WP_001125919.1 STRING:243277.VC0957 DNASU:2614210 EnsemblBacteria:…	156	1	156	100	242.3	6e-63	112/156	71	134/156	85	0/156	0	1
gene803	NC_004603.1	802938	803897	+	protein_coding	VP0764	.	1188260	.	NP_797143.1	outer membrane protein OmpA	3.27736	8.6967	5.75461e-15	2.10688e-13	9.3115	7.60394	7.60394	9.3115	584	2437	178.562	746.068	960	1	958	99.79	UNIPROTKB|O31154 - symbol:ompA "Membrane protein" species:666 "Vibrio cholerae" [GO:0004872 "receptor activity" evidence=ISS] [GO:0006810 "transport" evidence=ISS] [GO:0009279 "cell outer membrane" evidence=ISS] [GO:0015288 "porin activity" evidence=ISS] InterPro:IPR000498 InterPro:IPR006664 InterPro:IPR006690 Pfam:PF01389 PRINTS:PR01021 PROSITE:PS01068 InterPro:IPR011250 Pfam:PF00691 GO:GO:00160…	321	1	321	100	350.9	2e-95	176/321	54	233/321	72	2/321	0	1
gene808	NC_004603.1	806477	807115	+	protein_coding	VP0768	.	1188265	.	NP_797147.1	hypothetical protein	-3.45693	7.90237	1.92778e-15	7.58083e-14	6.75823	8.53856	8.53856	6.75823	1119	412	514.017	189.492	639	1	637	99.69	UNIPROTKB|Q9KQ00 - symbol:VC_2207 "Uncharacterized protein" species:243277 "Vibrio cholerae O1 biovar El Tor str. N16961" [GO:0003674 "molecular_function" evidence=ND] [GO:0005575 "cellular_component" evidence=ND] [GO:0008150 "biological_process" evidence=ND] EMBL:AE003852 Proteomes:UP000000584 eggNOG:COG5616 PIR:E82105 RefSeq:NP_231838.1 RefSeq:WP_001881912.1 STRING:243277.VC2207 DNASU:2613247 E…	222	12	222	95.05	375.9	5e-103	182/212	85	201/212	94	1/212	0	1
gene809	NC_004603.1	807125	807556	+	protein_coding	VP0769	.	1188266	.	NP_797148.1	hypothetical protein	-2.72041	6.40201	3.80378e-09	7.88031e-08	5.53279	6.9575	6.9575	5.53279	372	174	252.759	118.375	432	10	430	97.45	UNIPROTKB|Q9KQ01 - symbol:VC_2206 "Uncharacterized protein" species:243277 "Vibrio cholerae O1 biovar El Tor str. N16961" [GO:0003674 "molecular_function" evidence=ND] [GO:0005575 "cellular_component" evidence=ND] [GO:0008150 "biological_process" evidence=ND] EMBL:AE003852 Proteomes:UP000000584 PIR:D82105 RefSeq:NP_231837.1 RefSeq:WP_001881911.1 STRING:243277.VC2206 DNASU:2613246 EnsemblBacteria:…	145	6	145	96.55	222.6	4e-57	112/140	80	124/140	88	0/140	0	1
gene810	NC_004603.1	807670	808095	-	protein_coding	VP0770	.	1188267	.	NP_797149.1	polar flagellar FlgN	-4.62213	8.71755	3.60993e-23	2.28827e-21	7.23536	9.43667	9.43667	7.23536	2088	575	1438.7	396.691	426	1	424	99.53	UNIPROTKB|Q9KQ02 - symbol:VC_2205 "Uncharacterized protein" species:243277 "Vibrio cholerae O1 biovar El Tor str. N16961" [GO:0003674 "molecular_function" evidence=ND] [GO:0005575 "cellular_component" evidence=ND] [GO:0008150 "biological_process" evidence=ND] InterPro:IPR007809 InterPro:IPR036679 Pfam:PF05130 EMBL:AE003852 Proteomes:UP000000584 GO:GO:0044780 eggNOG:COG3418 KO:K02399 Gene3D:1.20.5…	143	3	143	98.6	199.5	4e-50	97/141	68	123/141	87	0/141	0	1
gene811	NC_004603.1	808122	808439	-	protein_coding	VP0771	.	1188268	.	NP_797150.1	polar flagellar FlgM	-2.65001	9.4718	3.59494e-11	9.42451e-10	8.60701	10.0108	10.0108	8.60701	3110	1494	2870.66	1380.76	318	1	310	97.48	TIGR_CMR|VC_2204 - symbol:VC_2204 "negative regulator of flagellin synthesis FlgM" species:686 "Vibrio cholerae O1 biovar El Tor" [GO:0001539 "cilium or flagellum-dependent cell motility" evidence=ISS] [GO:0045718 "obsolete negative regulation of flagellum assembly" evidence=ISS] InterPro:IPR007412 Pfam:PF04316 GO:GO:0045892 EMBL:AE003852 Proteomes:UP000000584 eggNOG:COG2747 KO:K02398 Gene3D:1.10…	107	1	106	99.07	93.6	2e-18	72/106	67	84/106	79	3/106	2	1
gene813	NC_004603.1	809390	810316	+	protein_coding	VP0773	.	1188270	.	NP_797152.1	chemotaxis CheV	-6.08302	10.2127	1.51709e-32	1.69555e-30	8.39244	10.9938	10.9938	8.39244	6150	1287	1947.35	408.031	927	1	925	99.78	UNIPROTKB|Q9KQ05 - symbol:VC_2202 "Chemotaxis protein CheV" species:243277 "Vibrio cholerae O1 biovar El Tor str. N16961" [GO:0004871 "signal transducer activity" evidence=ISS] [GO:0006935 "chemotaxis" evidence=ISS] InterPro:IPR001789 InterPro:IPR002545 InterPro:IPR036061 Pfam:PF00072 Pfam:PF01584 PROSITE:PS50110 PROSITE:PS50851 SMART:SM00260 SMART:SM00448 GO:GO:0005829 EMBL:AE003852 Proteomes:UP…	308	1	308	100	521.2	1e-146	267/308	86	287/308	93	0/308	0	1
gene814	NC_004603.1	810328	811155	+	protein_coding	VP0774	.	1188271	.	NP_797153.1	chemotaxis methyltransferase CheR	-3.72595	10.785	4.9802e-19	2.32428e-17	9.5461	11.4423	11.4423	9.5461	8394	2868	2975.68	1017.99	828	1	826	99.76	UNIPROTKB|Q9KQ06 - symbol:cheR1 "Chemotaxis protein methyltransferase 1" species:243277 "Vibrio cholerae O1 biovar El Tor str. N16961" [GO:0006935 "chemotaxis" evidence=ISS] InterPro:IPR000780 PRINTS:PR00996 PROSITE:PS50123 SMART:SM00138 Pfam:PF01739 InterPro:IPR029063 EMBL:AE003852 Proteomes:UP000000584 SUPFAM:SSF53335 GO:GO:0006935 eggNOG:ENOG410XNMH eggNOG:ENOG4105BZU GO:GO:0008983 EMBL:AF1391…	275	1	275	100	516.5	3e-145	256/275	93	271/275	98	0/275	0	1
gene815	NC_004603.1	811468	811863	+	protein_coding	VP0775	.	1188272	flgB	NP_797154.1	flagellar basal-body rod protein FlgB	-9.57194	12.9092	2.99713e-48	1.5911e-45	10.508	13.7659	13.7659	10.508	42030	5590	31153.9	4148.69	396	1	394	99.49	UNIPROTKB|Q9KQ07 - symbol:VC_2200 "Flagellar basal body rod protein FlgB" species:243277 "Vibrio cholerae O1 biovar El Tor str. N16961" [GO:0005198 "structural molecule activity" evidence=ISS] [GO:0009424 "bacterial-type flagellum hook" evidence=IBA] [GO:0009425 "bacterial-type flagellum basal body" evidence=ISS] [GO:0071978 "bacterial-type flagellum-dependent swarming motility" evidence=IBA] Int…	131	1	131	100	226.5	3e-58	108/131	82	124/131	94	0/131	0	1
gene816	NC_004603.1	811869	812282	+	protein_coding	VP0776	.	1188273	flgC	NP_797155.1	flagellar basal body rod protein FlgC	-8.87985	12.7804	1.29173e-45	4.57164e-43	10.4769	13.6266	13.6266	10.4769	38161	5471	27056.3	3883.83	414	1	412	99.52	UNIPROTKB|Q9KQ08 - symbol:VC_2199 "Flagellar basal-body rod protein FlgC" species:243277 "Vibrio cholerae O1 biovar El Tor str. N16961" [GO:0005198 "structural molecule activity" evidence=ISS] [GO:0009424 "bacterial-type flagellum hook" evidence=IBA] [GO:0009425 "bacterial-type flagellum basal body" evidence=ISS] [GO:0071978 "bacterial-type flagellum-dependent swarming motility" evidence=IBA] Int…	138	1	138	100	234.6	1e-60	123/138	89	129/138	93	1/138	0	1
gene817	NC_004603.1	812300	813007	+	protein_coding	VP0777	.	1188274	flgD	NP_797156.1	flagellar basal body rod modification protein	-7.12336	12.9684	3.33348e-38	6.43513e-36	10.9471	13.779	13.779	10.9471	42413	7580	17583.9	3146.52	708	1	706	99.72	UNIPROTKB|Q9KQ09 - symbol:VC_2198 "Basal-body rod modification protein FlgD" species:243277 "Vibrio cholerae O1 biovar El Tor str. N16961" [GO:0009424 "bacterial-type flagellum hook" evidence=IBA] [GO:0071978 "bacterial-type flagellum-dependent swarming motility" evidence=IBA] Pfam:PF03963 EMBL:AE003852 Proteomes:UP000000584 GO:GO:0071978 GO:GO:0044781 GO:GO:0009424 eggNOG:ENOG4105W00 eggNOG:COG1…	235	1	235	100	396.4	4e-109	199/235	84	221/235	94	0/235	0	1
gene818	NC_004603.1	813039	814352	+	protein_coding	VP0778	.	1188275	flgE	NP_797157.1	flagellar hook protein FlgE	-7.07759	14.6389	4.46349e-38	7.89852e-36	12.6252	15.4482	15.4482	12.6252	134898	24265	30134.1	5427.24	1314	1	1312	99.85	UNIPROTKB|Q9KQ10 - symbol:VC_2197 "Flagellar hook protein FlgE" species:243277 "Vibrio cholerae O1 biovar El Tor str. N16961" [GO:0005198 "structural molecule activity" evidence=ISS] [GO:0009424 "bacterial-type flagellum hook" evidence=ISS;IBA] [GO:0071978 "bacterial-type flagellum-dependent swarming motility" evidence=IBA] InterPro:IPR001444 Pfam:PF00460 Pfam:PF07559 Prosite:PS00588 EMBL:AE00385…	434	1	434	100	739.2	4e-212	357/437	81	398/437	91	3/437	0	1
gene819	NC_004603.1	814441	814527	-	protein_coding	VP0779	.	1188276	.	NP_797158.1	hypothetical protein	-4.3381	4.44865	8.51841e-10	1.89412e-08	3.18107	5.1751	5.1751	3.18107	106	31	357.631	104.722	87				No hit
gene820	NC_004603.1	814647	815396	+	protein_coding	VP0780	.	1188277	flgF	NP_797159.1	flagellar basal body rod protein FlgF	-5.83298	9.02855	8.44126e-30	7.79349e-28	7.26497	9.80169	9.80169	7.26497	2690	587	1052.78	230.023	750	1	748	99.73	UNIPROTKB|Q9KQ11 - symbol:VC_2196 "Flagellar basal-body rod protein FlgF" species:243277 "Vibrio cholerae O1 biovar El Tor str. N16961" [GO:0005198 "structural molecule activity" evidence=ISS] [GO:0009424 "bacterial-type flagellum hook" evidence=IBA] [GO:0009425 "bacterial-type flagellum basal body" evidence=ISS] [GO:0071978 "bacterial-type flagellum-dependent swarming motility" evidence=IBA] Int…	249	1	249	100	411.8	9e-114	203/249	81	227/249	91	0/249	0	1
gene821	NC_004603.1	815415	816203	+	protein_coding	VP0781	.	1188278	flgG	NP_797160.1	flagellar basal body rod protein FlgG	-2.48442	5.85635	4.05093e-07	5.89188e-06	5.09002	6.37833	6.37833	5.09002	248	127	92.262	47.3065	789	1	787	99.75	UNIPROTKB|Q9KQ12 - symbol:VC_2195 "Flagellar basal-body rod protein FlgG" species:243277 "Vibrio cholerae O1 biovar El Tor str. N16961" [GO:0005198 "structural molecule activity" evidence=ISS] [GO:0009424 "bacterial-type flagellum hook" evidence=IBA] [GO:0009425 "bacterial-type flagellum basal body" evidence=ISS] [GO:0071978 "bacterial-type flagellum-dependent swarming motility" evidence=IBA] Int…	262	1	262	100	465.7	6e-130	225/262	85	248/262	94	0/262	0	1
gene825	NC_004603.1	819254	821194	+	protein_coding	VP0785	.	1188282	flgK	NP_797164.1	flagellar hook-associated protein FlgK	-4.94891	8.04565	6.88847e-24	4.6437e-22	6.48813	8.78283	8.78283	6.48813	1326	341	200.524	51.6325	1941	1	1939	99.9	UNIPROTKB|Q9KQ16 - symbol:VC_2191 "Flagellar hook-associated protein FlgM" species:243277 "Vibrio cholerae O1 biovar El Tor str. N16961" [GO:0005198 "structural molecule activity" evidence=ISS] [GO:0009424 "bacterial-type flagellum hook" evidence=ISS] InterPro:IPR002371 PRINTS:PR01005 EMBL:AE003852 Proteomes:UP000000584 GO:GO:0005198 GO:GO:0009424 InterPro:IPR010930 Pfam:PF06429 GO:GO:0044780 egg…	624	1	624	100	863.2	3e-249	438/646	67	522/646	80	22/646	3	1
gene826	NC_004603.1	821208	822401	+	protein_coding	VP0786	.	1188283	flgL	NP_797165.1	flagellar hook-associated protein FlgL	-2.62555	7.23237	1.28103e-09	2.76169e-08	6.38855	7.77086	7.77086	6.38855	656	318	161.268	78.2739	1194	1	1192	99.83	UNIPROTKB|Q9KQ17 - symbol:VC_2190 "Flagellar hook-associated protein FlgL" species:243277 "Vibrio cholerae O1 biovar El Tor str. N16961" [GO:0005198 "structural molecule activity" evidence=ISS] [GO:0009424 "bacterial-type flagellum hook" evidence=ISS] InterPro:IPR001029 InterPro:IPR013384 Pfam:PF00669 Pfam:PF00700 EMBL:AE003852 Proteomes:UP000000584 GO:GO:0005198 GO:GO:0071973 eggNOG:COG1344 GO:G…	397	1	397	100	571.2	1e-161	274/397	69	336/397	84	0/397	0	1
gene827	NC_004603.1	822480	822584	-	protein_coding	VP0787	.	1188284	.	NP_797166.1	hypothetical protein	-4.32196	4.48941	7.90025e-10	1.77526e-08	3.2219	5.21426	5.21426	3.2219	109	32	304.709	89.5684	105				No hit
gene828	NC_004603.1	822837	823991	+	protein_coding	VP0788	.	1188285	.	NP_797167.1	flagellin	-5.11229	12.0021	8.39246e-28	6.98878e-26	10.3915	12.7446	12.7446	10.3915	20705	5156	5261.89	1311.97	1155	1	1153	99.83	TIGR_CMR|VC_2188 - symbol:VC_2188 "flagellin core protein A" species:686 "Vibrio cholerae O1 biovar El Tor" [GO:0001539 "cilium or flagellum-dependent cell motility" evidence=ISS] [GO:0005198 "structural molecule activity" evidence=ISS] [GO:0009420 "bacterial-type flagellum filament" evidence=ISS] InterPro:IPR001029 InterPro:IPR001492 InterPro:IPR010810 Pfam:PF00669 Pfam:PF00700 Pfam:PF07196 PRIN…	379	1	379	100	565.8	6e-160	295/385	76	344/385	89	7/385	1	1
gene829	NC_004603.1	824266	824451	-	protein_coding	VP0789	.	1188286	.	NP_797168.1	hypothetical protein	-2.70234	11.2099	7.79224e-12	2.19163e-10	10.3224	11.756	11.756	10.3224	10433	4915	16464.3	7766.13	186				No hit
gene830	NC_004603.1	824663	825799	+	protein_coding	VP0790	.	1188287	.	NP_797169.1	flagellin	-8.99943	8.70719	9.36119e-42	2.09247e-39	6.40193	9.55708	9.55708	6.40193	2270	321	586.022	82.9733	1137	1	1135	99.82	TIGR_CMR|VC_2143 - symbol:VC_2143 "flagellin FlaD" species:686 "Vibrio cholerae O1 biovar El Tor" [GO:0001539 "cilium or flagellum-dependent cell motility" evidence=ISS] [GO:0005198 "structural molecule activity" evidence=ISS] [GO:0009420 "bacterial-type flagellum filament" evidence=ISS] InterPro:IPR001029 InterPro:IPR001492 InterPro:IPR010810 Pfam:PF00669 Pfam:PF00700 Pfam:PF07196 PRINTS:PR00207…	377	1	377	100	610.1	3e-173	318/378	84	342/378	90	1/378	0	1
gene843	NC_004603.1	837314	837457	+	protein_coding	VP0803	.	1188300	.	NP_797182.1	hypothetical protein	-8.10924	2.91191	2.42031e-07	3.71085e-06	1.35721	3.7996	3.7996	1.35721	39	6	79.4969	12.2457	144				No hit
gene847	NC_004603.1	840647	840712	-	protein_coding	VP0807	.	1188304	.	NP_797186.1	hypothetical protein	-6.83167	8.18332	1.86038e-32	2.02591e-30	6.23247	8.98884	8.98884	6.23247	1530	285	6804.49	1269.1	66				No hit
gene866	NC_004603.1	855392	857056	-	protein_coding	VP0826	.	1188323	asnB	NP_797205.1	asparagine synthetase B	3.1386	7.71992	3.78694e-13	1.21842e-11	8.31907	6.67823	6.67823	8.31907	306	1223	53.9455	215.877	1665	1	1663	99.88	UNIPROTKB|Q9KTB2 - symbol:VC_0991 "Asparagine synthetase B, glutamine-hydrolyzing" species:243277 "Vibrio cholerae O1 biovar El Tor str. N16961" [GO:0004066 "asparagine synthase (glutamine-hydrolyzing) activity" evidence=ISS;IBA] [GO:0005829 "cytosol" evidence=IBA] [GO:0006529 "asparagine biosynthetic process" evidence=ISS;IBA] [GO:0006541 "glutamine metabolic process" evidence=IBA] [GO:0042803 "…	554	1	554	100	1042	4e-303	502/554	90	532/554	96	0/554	0	1
gene876	NC_004603.1	867205	867426	-	protein_coding	VP0836	.	1188333	.	NP_797215.1	hypothetical protein	-2.18417	6.52926	2.50814e-06	3.13297e-05	5.87751	6.99171	6.99171	5.87751	381	222	503.756	293.896	222	1	220	99.1	UNIPROTKB|Q9KQA2 - symbol:VC_2098 "Uncharacterized protein" species:243277 "Vibrio cholerae O1 biovar El Tor str. N16961" [GO:0003674 "molecular_function" evidence=ND] [GO:0005575 "cellular_component" evidence=ND] [GO:0008150 "biological_process" evidence=ND] GO:GO:0016021 EMBL:AE003852 Proteomes:UP000000584 PIR:H82119 RefSeq:NP_231730.1 RefSeq:WP_000965050.1 STRING:243277.VC2098 DNASU:2613354 En…	73	1	73	100	141.7	5e-33	67/73	91	71/73	97	0/73	0	1
gene885	NC_004603.1	874911	876677	+	protein_coding	VP0845	.	1188342	sdhA	NP_797224.1	succinate dehydrogenase flavoprotein subunit	2.1922	9.68546	7.77907e-08	1.28053e-06	10.1431	9.01218	9.01218	10.1431	1555	4340	258.311	721.85	1767	1	1765	99.89	UNIPROTKB|Q9KQB1 - symbol:VC_2089 "Succinate dehydrogenase flavoprotein subunit" species:243277 "Vibrio cholerae O1 biovar El Tor str. N16961" [GO:0000104 "succinate dehydrogenase activity" evidence=ISS] [GO:0006099 "tricarboxylic acid cycle" evidence=ISS] [GO:0009055 "electron transfer activity" evidence=ISS] [GO:0045282 "plasma membrane succinate dehydrogenase complex" evidence=ISS] InterPro:IP…	588	1	588	100	1140.9	0	553/588	94	574/588	97	0/588	0	1
gene886	NC_004603.1	876692	877402	+	protein_coding	VP0846	.	1188343	sdhB	NP_797225.1	succinate dehydrogenase iron-sulfur subunit	2.09247	10.3845	3.45004e-07	5.08761e-06	10.8209	9.75653	9.75653	10.8209	2607	6945	1076.27	2870.76	711	1	709	99.72	UNIPROTKB|Q9KQB2 - symbol:VC_2088 "Succinate dehydrogenase iron-sulfur subunit" species:243277 "Vibrio cholerae O1 biovar El Tor str. N16961" [GO:0000104 "succinate dehydrogenase activity" evidence=ISS] [GO:0006099 "tricarboxylic acid cycle" evidence=ISS] [GO:0009055 "electron transfer activity" evidence=ISS] [GO:0045282 "plasma membrane succinate dehydrogenase complex" evidence=ISS] InterPro:IPR…	236	1	236	100	476.5	3e-133	226/236	95	232/236	98	0/236	0	1
gene899	NC_004603.1	893489	893719	+	protein_coding	VP0859	.	1188356	.	NP_797238.1	hypothetical protein	-2.4123	3.77954	0.00122608	0.00794984	3.13906	4.31399	4.31399	3.13906	57	30	72.4288	38.1683	231	1	229	99.13	UNIPROTKB|Q9KQC4 - symbol:VC_2076 "Uncharacterized protein" species:243277 "Vibrio cholerae O1 biovar El Tor str. N16961" [GO:0003674 "molecular_function" evidence=ND] [GO:0005575 "cellular_component" evidence=ND] [GO:0008150 "biological_process" evidence=ND] EMBL:AE003852 Proteomes:UP000000584 Gene3D:1.10.10.10 InterPro:IPR036388 InterPro:IPR036390 SUPFAM:SSF46785 InterPro:IPR015102 Pfam:PF09012…	76	1	76	100	73.9	1e-12	38/76	50	51/76	67	0/76	0	1
gene936	NC_004603.1	928025	928285	-	protein_coding	VP0895	.	1188393	.	NP_797274.1	acyl carrier protein	-2.15754	4.17663	0.00142836	0.00902716	3.60805	4.65494	4.65494	3.60805	73	43	82.0976	48.4197	261	10	250	92.34	UNIPROTKB|Q8E9B6 - symbol:SO_4368 "Acyl carrier protein" species:211586 "Shewanella oneidensis MR-1" [GO:0000036 "acyl carrier activity" evidence=ISS] [GO:0006633 "fatty acid biosynthetic process" evidence=ISS] Pfam:PF00550 EMBL:AE014299 Proteomes:UP000008186 GO:GO:0006633 eggNOG:COG0236 GO:GO:0000036 Gene3D:1.10.1200.10 InterPro:IPR036736 InterPro:IPR009081 SUPFAM:SSF47336 PROSITE:PS50075 KO:K02…	84	3	82	95.24	119.8	2e-26	56/80	70	73/80	91	0/80	0	1
gene939	NC_004603.1	929868	930266	+	protein_coding	VP0898	.	1188396	.	NP_797277.1	lipoprotein	-2.63532	3.66709	0.000430601	0.00324824	2.95759	4.24002	4.24002	2.95759	54	26	39.7255	19.1511	399	4	370	91.98	UNIPROTKB|Q4KJH9 - symbol:PFL_0460 "Putative lipoprotein" species:220664 "Pseudomonas protegens Pf-5" [GO:0003674 "molecular_function" evidence=ND] [GO:0008150 "biological_process" evidence=ND] EMBL:CP000076 Proteomes:UP000008540 RefSeq:WP_011058834.1 STRING:220664.PFL_0460 EnsemblBacteria:AAY95869 KEGG:pfl:PFL_0460 PATRIC:fig|220664.5.peg.472 eggNOG:ENOG41065KM eggNOG:ENOG411292D HOGENOM:HOG0002…	149	3	125	82.55	77.8	2e-13	43/123	34	66/123	53	1/123	0	1
gene943	NC_004603.1	933540	934892	-	protein_coding	VP0902	.	1188400	.	NP_797281.1	hypothetical protein	2.71401	4.98436	2.3545e-06	2.95845e-05	5.52465	4.13508	4.13508	5.52465	50	173	10.8473	37.5787	1353	34	1330	95.86	UNIPROTKB|Q8EDE1 - symbol:SO_2815 "Transporter-like protein HCC family" species:211586 "Shewanella oneidensis MR-1" [GO:0003674 "molecular_function" evidence=ND] [GO:0008150 "biological_process" evidence=ND] InterPro:IPR016169 InterPro:IPR036318 Pfam:PF03471 InterPro:IPR000644 GO:GO:0016021 GO:GO:0005886 GO:GO:0050660 EMBL:AE014299 Proteomes:UP000008186 Pfam:PF00571 PROSITE:PS51371 GO:GO:0016614 …	439	1	434	98.86	368.2	2e-100	195/435	44	295/435	67	4/435	0	1
gene989	NC_004603.1	983732	983929	+	protein_coding	VP0942	.	1188446	.	NP_797321.1	fimbrial protein	-4.51979	7.65886	5.68552e-21	3.0183e-19	6.21235	8.37394	8.37394	6.21235	998	281	1479.5	417.095	198				No hit
gene998	NC_004603.1	992090	992392	-	protein_coding	VP0951	.	1188455	.	NP_797330.1	methylated-DNA-protein-cysteine methyltransferase-like protein	-2.83707	3.44504	0.000505667	0.00372196	2.69302	4.05104	4.05104	2.69302	47	21	45.5306	20.369	303	1	298	98.35	UNIPROTKB|Q9KT40 - symbol:VC_1065 "Methylated-DNA--protein-cysteine methyltransferase-related protein" species:243277 "Vibrio cholerae O1 biovar El Tor str. N16961" [GO:0003684 "damaged DNA binding" evidence=IBA] [GO:0006307 "DNA dealkylation involved in DNA repair" evidence=IBA] [GO:0008150 "biological_process" evidence=ND] [GO:0003908 "methylated-DNA-[protein]-cysteine S-methyltransferase activ…	100	1	99	99	167.2	2e-40	80/99	80	89/99	89	0/99	0	1
gene999	NC_004603.1	992661	993404	+	protein_coding	VP0952	.	1188456	.	NP_797331.1	hypothetical protein	2.94315	8.74902	8.38584e-13	2.58077e-11	9.3262	7.77304	7.77304	9.3262	657	2462	259.203	972.544	744	1	739	99.33	UNIPROTKB|Q9KT39 - symbol:VC_1066 "Uncharacterized protein" species:243277 "Vibrio cholerae O1 biovar El Tor str. N16961" [GO:0003674 "molecular_function" evidence=ND] [GO:0005575 "cellular_component" evidence=ND] [GO:0008150 "biological_process" evidence=ND] GO:GO:0016021 EMBL:AE003852 Proteomes:UP000000584 PIR:E82245 RefSeq:NP_230711.1 RefSeq:WP_000603545.1 STRING:243277.VC1066 DNASU:2614336 En…	247	1	247	100	292.4	8e-78	141/247	57	183/247	74	1/247	0	1
gene1017	NC_004603.1	1011398	1011538	+	protein_coding	VP0970	.	1188474	.	NP_797349.1	hypothetical protein	-10.1734	1.05917	0.0139512	0.0601329	0.333786	1.99374	1.99374	0.333786	9	1	18.7358	2.08437	141				No hit
gene1056	NC_004603.1	1056492	1057145	+	protein_coding	VP1009	.	1188513	.	NP_797388.1	hypothetical protein	-2.30965	6.22635	1.14501e-06	1.51527e-05	5.52465	6.7151	6.7151	5.52465	314	173	140.929	77.7432	654				No hit
gene1059	NC_004603.1	1060628	1060867	-	protein_coding	VP1012	.	1188516	.	NP_797391.1	cold shock-like protein CspD	-2.23746	9.97285	3.13984e-08	5.57945e-07	9.27983	10.4405	10.4405	9.27983	4190	2384	5124.49	2919.37	240	19	235	90.42	UNIPROTKB|Q9KSW4 - symbol:cspD "Cold shock-like protein CspD" species:243277 "Vibrio cholerae O1 biovar El Tor str. N16961" [GO:0006355 "regulation of transcription, DNA-templated" evidence=ISS] [GO:0009409 "response to cold" evidence=ISS] InterPro:IPR002059 InterPro:IPR011129 InterPro:IPR012156 InterPro:IPR012751 Pfam:PF00313 PIRSF:PIRSF002599 PRINTS:PR00050 SMART:SM00357 Prosite:PS00352 GO:GO:0…	76	3	74	94.74	133.3	2e-30	61/72	84	67/72	93	0/72	0	1
gene1062	NC_004603.1	1064317	1065357	+	protein_coding	VP1015	.	1188519	.	NP_797394.1	hypothetical protein	-2.25677	3.56972	0.00404431	0.0216052	3.00514	4.0796	4.0796	3.00514	48	27	13.5344	7.62267	1041	133	976	81.08	UNIPROTKB|Q81PQ1 - symbol:GBAA_2750 "Uncharacterized protein" species:1392 "Bacillus anthracis" [GO:0003674 "molecular_function" evidence=ND] [GO:0005575 "cellular_component" evidence=ND] [GO:0008150 "biological_process" evidence=ND] Pfam:PF00144 EMBL:AE017334 Proteomes:UP000000594 InterPro:IPR001466 InterPro:IPR012338 SUPFAM:SSF56601 eggNOG:COG1680 eggNOG:ENOG4105J41 RefSeq:WP_000346237.1 STRING…	309	15	281	86.41	122.9	1e-26	87/289	30	142/289	49	30/289	10	1
gene1063	NC_004603.1	1065426	1065644	-	protein_coding	VP1016	.	1188520	infA	NP_797395.1	translation initiation factor IF-1	-2.15517	8.28562	3.26511e-07	4.83168e-06	7.63358	8.73762	8.73762	7.63358	1285	759	1722.29	1018.57	219	1	217	99.09	UNIPROTKB|P65128 - symbol:infA "Translation initiation factor IF-1" species:243277 "Vibrio cholerae O1 biovar El Tor str. N16961" [GO:0003743 "translation initiation factor activity" evidence=ISS] [GO:0006413 "translational initiation" evidence=ISS] HAMAP:MF_00075 InterPro:IPR004368 InterPro:IPR006196 Pfam:PF01176 PROSITE:PS50832 GO:GO:0005829 EMBL:AE003852 Proteomes:UP000000584 GO:GO:0006413 GO:…	72	1	72	100	145.2	5e-34	72/72	100	72/72	100	0/72	0	1
gene1085	NC_004603.1	1090519	1090671	-	protein_coding	VP1038	.	1188542	.	NP_797417.1	hypothetical protein	-2.25721	8.12347	7.4546e-08	1.23964e-06	7.4265	8.59653	8.59653	7.4265	1165	657	2235.03	1262.02	153				No hit
gene1095	NC_004603.1	1099986	1101101	+	protein_coding	VP1049	.	1188553	.	NP_797428.1	hypothetical protein	2.0544	5.59674	0.000112186	0.000986443	6.02321	5.00686	5.00686	6.02321	94	246	24.7236	64.7836	1116	830	1115	25.63	UNIPROTKB|Q8EH45 - symbol:SO_1385 "Chemotaxis signal transduction system methyl accepting sensory transducer with PAS sensory domain" species:211586 "Shewanella oneidensis MR-1" [GO:0004871 "signal transducer activity" evidence=ISS] [GO:0004872 "receptor activity" evidence=ISS] [GO:0006935 "chemotaxis" evidence=ISS] InterPro:IPR004089 InterPro:IPR004090 InterPro:IPR013655 Pfam:PF00015 Pfam:PF0844…	520	314	400	16.73	63.9	7e-09	42/95	44	60/95	63	8/95	8	2
gene1096	NC_004603.1	1101061	1101438	+	protein_coding	VP1050	.	1188554	.	NP_797429.1	hypothetical protein	3.25292	3.83444	2.15975e-05	0.000225923	4.43062	2.86726	2.86726	4.43062	19	79	14.754	61.4227	378	1	250	66.14	UNIPROTKB|P07017 - symbol:tar "methyl-accepting chemotaxis protein Tar" species:83333 "Escherichia coli K-12" [GO:0043424 "protein histidine kinase binding" evidence=IDA] [GO:0005887 "integral component of plasma membrane" evidence=RCA;IDA] [GO:0004888 "transmembrane signaling receptor activity" evidence=IMP] [GO:0005515 "protein binding" evidence=IPI] [GO:0006935 "chemotaxis" evidence=IMP] [GO:0…	553	396	478	15.01	48.1	0.0001	28/83	33	49/83	59	0/83	0	1
gene1102	NC_004603.1	1106946	1107365	+	protein_coding	VP1056	.	1188560	.	NP_797435.1	hypothetical protein	-2.06901	4.13732	0.00257934	0.0147091	3.60805	4.59685	4.59685	3.60805	70	43	48.9212	30.0894	420	10	418	97.38	UNIPROTKB|Q9KR07 - symbol:VC_1840 "Uncharacterized protein" species:243277 "Vibrio cholerae O1 biovar El Tor str. N16961" [GO:0003674 "molecular_function" evidence=ND] [GO:0005575 "cellular_component" evidence=ND] [GO:0008150 "biological_process" evidence=ND] InterPro:IPR006684 InterPro:IPR014166 PIRSF:PIRSF003230 Pfam:PF03061 InterPro:IPR006683 InterPro:IPR029069 SUPFAM:SSF54637 EMBL:AE003852 Pr…	155	20	155	87.74	202.6	5e-51	97/136	71	113/136	83	0/136	0	1
gene1160	NC_004603.1	1172832	1173884	+	protein_coding	VP1113	.	1188618	.	NP_797492.1	biotin synthase	-2.32936	7.8751	3.3764e-08	5.95002e-07	7.14803	8.36236	8.36236	7.14803	990	541	275.966	150.995	1053	1	1051	99.81	UNIPROTKB|Q9KSZ4 - symbol:bioB "Biotin synthase" species:243277 "Vibrio cholerae O1 biovar El Tor str. N16961" [GO:0004076 "biotin synthase activity" evidence=ISS] [GO:0009102 "biotin biosynthetic process" evidence=ISS] HAMAP:MF_01694 InterPro:IPR002684 InterPro:IPR006638 InterPro:IPR007197 InterPro:IPR013785 Pfam:PF04055 SMART:SM00729 UniPathway:UPA00078 InterPro:IPR010722 Pfam:PF06968 Gene3D:3.…	350	1	350	100	632.1	6e-180	306/350	87	330/350	94	0/350	0	1
gene1164	NC_004603.1	1176594	1176761	-	protein_coding	VP1117	.	1188622	.	NP_797496.1	hypothetical protein	-2.61081	9.09012	8.9528e-11	2.24985e-09	8.24178	9.62344	9.62344	8.24178	2377	1159	4153.06	2027.53	168	1	166	98.81	UNIPROTKB|Q9KSZ0 - symbol:VC_1116 "Uncharacterized protein" species:243277 "Vibrio cholerae O1 biovar El Tor str. N16961" [GO:0003674 "molecular_function" evidence=ND] [GO:0005575 "cellular_component" evidence=ND] [GO:0008150 "biological_process" evidence=ND] EMBL:AE003852 Proteomes:UP000000584 PIR:D82239 RefSeq:NP_230761.1 RefSeq:WP_001880897.1 STRING:243277.VC1116 DNASU:2614386 EnsemblBacteria:…	69	14	69	81.16	64.7	6e-10	32/56	57	42/56	75	1/56	1	1
gene1172	NC_004603.1	1183224	1183784	+	protein_coding	VP1125	.	1188630	.	NP_797504.1	hypothetical protein	2.33671	5.61354	6.79025e-06	7.81523e-05	6.09639	4.89882	4.89882	6.09639	87	259	45.5203	135.685	561	1	559	99.64	UNIPROTKB|Q9KSY2 - symbol:VC_1124 "Uncharacterized protein" species:243277 "Vibrio cholerae O1 biovar El Tor str. N16961" [GO:0003674 "molecular_function" evidence=ND] [GO:0005575 "cellular_component" evidence=ND] [GO:0008150 "biological_process" evidence=ND] InterPro:IPR016087 Pfam:PF16036 InterPro:IPR016088 EMBL:AE003852 Proteomes:UP000000584 GO:GO:0016872 Gene3D:3.50.70.10 eggNOG:ENOG4105N7V e…	188	1	188	100	177.9	2e-43	88/189	46	118/189	62	4/189	2	1
gene1180	NC_004603.1	1189718	1190125	-	protein_coding	VP1133	.	1188638	.	NP_797512.1	DNA-binding protein H-NS	-2.77716	7.89626	3.485e-11	9.19305e-10	6.98861	8.45519	8.45519	6.98861	1056	484	759.717	348.642	408	1	406	99.51	UNIPROTKB|Q9KSX6 - symbol:VC_1130 "DNA-binding protein" species:243277 "Vibrio cholerae O1 biovar El Tor str. N16961" [GO:0003677 "DNA binding" evidence=ISS] [GO:0005694 "chromosome" evidence=ISS] [GO:0006323 "DNA packaging" evidence=ISS] [GO:0009297 "pilus assembly" evidence=ISS] [GO:0009405 "pathogenesis" evidence=ISS] InterPro:IPR001801 InterPro:IPR027444 InterPro:IPR027454 InterPro:IPR037150 …	137	3	137	98.54	153.3	3e-36	81/135	60	92/135	68	0/135	0	1
gene1184	NC_004603.1	1196765	1197679	+	protein_coding	VP1137	.	1188642	hisG	NP_797516.1	ATP phosphoribosyltransferase	-2.01535	9.13541	1.78796e-06	2.30105e-05	8.54602	9.55517	9.55517	8.54602	2267	1432	727.242	459.956	915	19	913	97.81	UNIPROTKB|Q9KSX4 - symbol:hisG "ATP phosphoribosyltransferase" species:243277 "Vibrio cholerae O1 biovar El Tor str. N16961" [GO:0000105 "histidine biosynthetic process" evidence=ISS;IBA] [GO:0003879 "ATP phosphoribosyltransferase activity" evidence=ISS;IBA] HAMAP:MF_00079 InterPro:IPR001348 InterPro:IPR013115 InterPro:IPR013820 InterPro:IPR018198 InterPro:IPR020621 Pfam:PF01634 Pfam:PF08029 PROS…	298	1	298	100	496.5	3e-139	258/298	86	268/298	89	0/298	0	1
gene1202	NC_004603.1	1211968	1212390	+	protein_coding	VP1155	.	1188660	.	NP_797534.1	hypothetical protein	2.09262	4.9799	0.000381815	0.00293763	5.4145	4.38436	4.38436	5.4145	60	160	41.6351	111.166	423	1	406	95.98	UNIPROTKB|Q489T4 - symbol:CPS_0422 "Putative membrane protein" species:167879 "Colwellia psychrerythraea 34H" [GO:0003674 "molecular_function" evidence=ND] [GO:0008150 "biological_process" evidence=ND] GO:GO:0016021 EMBL:CP000083 Proteomes:UP000000547 eggNOG:ENOG4105FX9 eggNOG:COG4125 HOGENOM:HOG000218246 OMA:CFNLAYD OrthoDB:POG091H041D InterPro:IPR007896 Pfam:PF05232 RefSeq:WP_011041283.1 STRING…	142	1	135	95.07	144.8	1e-33	66/135	48	92/135	68	0/135	0	1
gene1205	NC_004603.1	1213944	1214081	-	protein_coding	VP1158	.	1188663	.	NP_797537.1	hypothetical protein	-2.41551	3.28808	0.00481765	0.0248912	2.69302	3.83353	3.83353	2.69302	40	21	85.0803	44.7233	138				No hit
gene1208	NC_004603.1	1215822	1217006	+	protein_coding	VP1161	.	1188666	.	NP_797540.1	cytochrome c-type protein TorC	2.17417	6.62471	3.17184e-06	3.88207e-05	7.07749	5.96906	5.96906	7.07749	186	515	46.0726	127.727	1185	1	1183	99.83	UNIPROTKB|Q9KRE9 - symbol:VC_1693 "Cytochrome c-type protein TorC" species:243277 "Vibrio cholerae O1 biovar El Tor str. N16961" [GO:0009055 "electron transfer activity" evidence=ISS;IBA] [GO:0009061 "anaerobic respiration" evidence=IBA] [GO:0016021 "integral component of membrane" evidence=IBA] InterPro:IPR009154 InterPro:IPR036909 PIRSF:PIRSF000014 Pfam:PF03264 GO:GO:0016021 GO:GO:0005886 GO:GO…	394	1	394	100	688.7	6e-197	320/394	81	356/394	90	0/394	0	1
gene1209	NC_004603.1	1217031	1219493	+	protein_coding	VP1162	.	1188667	.	NP_797541.1	trimethylamine-N-oxide reductase	2.23127	8.36938	9.92232e-08	1.59622e-06	8.83464	7.68052	7.68052	8.83464	616	1750	73.4116	208.818	2463	1	2458	99.8	UNIPROTKB|Q9KRF0 - symbol:torA "Trimethylamine-N-oxide reductase" species:243277 "Vibrio cholerae O1 biovar El Tor str. N16961" [GO:0009033 "trimethylamine-N-oxide reductase activity" evidence=ISS] [GO:0009061 "anaerobic respiration" evidence=ISS] [GO:0009322 "trimethylamine-N-oxide reductase complex" evidence=ISS] InterPro:IPR006655 InterPro:IPR006656 InterPro:IPR006657 InterPro:IPR011887 Pfam:P…	820	1	819	99.88	1549.6	0	721/819	88	774/819	94	0/819	0	1
gene1210	NC_004603.1	1219738	1221477	+	protein_coding	VP1163	.	1188668	.	NP_797542.1	alpha-1,6-galactosidase	3.09514	8.05692	3.00951e-13	9.88664e-12	8.65158	7.0288	7.0288	8.65158	391	1541	65.9593	260.284	1740	13	1126	64.02	UNIPROTKB|Q9KRF2 - symbol:VC_1690 "Alpha-1,6-galactosidase, putative" species:243277 "Vibrio cholerae O1 biovar El Tor str. N16961" [GO:0004557 "alpha-galactosidase activity" evidence=ISS] [GO:0005995 "melibiose catabolic process" evidence=ISS] InterPro:IPR002252 InterPro:IPR013785 Pfam:PF02065 Gene3D:3.20.20.70 InterPro:IPR017853 SUPFAM:SSF51445 EMBL:AE003852 Proteomes:UP000000584 CAZy:GH36 eggN…	374	4	374	99.2	479.9	6e-134	215/371	57	285/371	76	0/371	0	1
gene1211	NC_004603.1	1221563	1222777	-	protein_coding	VP1164	.	1188669	.	NP_797543.1	hypothetical protein	-7.40682	8.28043	6.39356e-35	8.75917e-33	6.22747	9.10019	9.10019	6.22747	1653	284	399.342	68.6967	1215	1	1210	99.59	UNIPROTKB|Q9KRF4 - symbol:VC_1688 "Uncharacterized protein" species:243277 "Vibrio cholerae O1 biovar El Tor str. N16961" [GO:0003674 "molecular_function" evidence=ND] [GO:0005575 "cellular_component" evidence=ND] [GO:0008150 "biological_process" evidence=ND] GO:GO:0016021 GO:GO:0071281 EMBL:AE003852 Proteomes:UP000000584 PIR:C82168 RefSeq:NP_231324.1 RefSeq:WP_001881475.1 STRING:243277.VC1688 DN…	415	14	414	96.63	521.9	1e-146	255/405	62	323/405	79	6/405	1	1
gene1214	NC_004603.1	1224418	1225200	-	protein_coding	VP1167	.	1188672	.	NP_797546.1	peptide ABC transporter ATP-binding protein	2.05899	4.39667	0.00201	0.0118397	4.82442	3.83353	3.83353	4.82442	40	105	14.995	39.4114	783	1	778	99.36	UNIPROTKB|Q9KRF8 - symbol:VC_1684 "Peptide ABC transporter, ATP-binding protein" species:243277 "Vibrio cholerae O1 biovar El Tor str. N16961" [GO:0015833 "peptide transport" evidence=ISS] [GO:0042626 "ATPase activity, coupled to transmembrane movement of substances" evidence=ISS] InterPro:IPR003439 Pfam:PF00005 PROSITE:PS50893 InterPro:IPR003593 InterPro:IPR027417 SUPFAM:SSF52540 GO:GO:0005524 E…	262	1	259	98.85	436	5e-121	214/259	82	239/259	92	0/259	0	1
gene1220	NC_004603.1	1231117	1231788	+	protein_coding	VP1173	.	1188678	.	NP_797552.1	phage shock protein A	-2.56934	9.83918	1.15242e-10	2.84555e-09	9.00586	10.3656	10.3656	9.00586	3978	1971	1737.58	862.008	672	1	661	98.36	UNIPROTKB|Q9KRG4 - symbol:VC_1678 "Phage shock protein A" species:243277 "Vibrio cholerae O1 biovar El Tor str. N16961" [GO:0005829 "cytosol" evidence=IBA] [GO:0009271 "phage shock" evidence=ISS] GO:GO:0005829 eggNOG:COG1842 InterPro:IPR007157 Pfam:PF04012 EMBL:AE003852 Proteomes:UP000000584 KO:K03969 OMA:MIFRAKA eggNOG:ENOG41087YS GO:GO:0009271 InterPro:IPR014319 TIGRFAMs:TIGR02977 PIR:H82169 Re…	222	1	220	99.1	355.9	5e-97	184/220	83	202/220	91	0/220	0	1
gene1221	NC_004603.1	1231803	1232036	+	protein_coding	VP1174	.	1188679	pspB	NP_797553.1	phage shock protein B	-2.31136	7.29664	1.03481e-07	1.6522e-06	6.58128	7.78176	7.78176	6.58128	661	364	829.151	457.172	234	1	232	99.15	UNIPROTKB|Q9KRG5 - symbol:VC_1677 "Phage shock protein B" species:243277 "Vibrio cholerae O1 biovar El Tor str. N16961" [GO:0009271 "phage shock" evidence=ISS] InterPro:IPR009554 Pfam:PF06667 GO:GO:0016021 GO:GO:0006355 EMBL:AE003852 Proteomes:UP000000584 GO:GO:0009271 eggNOG:ENOG4105YYT eggNOG:ENOG41123WF KO:K03970 TIGRFAMs:TIGR02976 PIR:G82169 RefSeq:NP_231313.1 RefSeq:WP_000093876.1 STRING:243…	77	1	77	100	106.3	2e-22	49/77	63	61/77	79	0/77	0	1
gene1222	NC_004603.1	1231999	1232418	+	protein_coding	VP1175	.	1188680	.	NP_797554.1	phage shock protein C	-3.13461	8.57264	4.66598e-14	1.63772e-12	7.53172	9.17488	9.17488	7.53172	1741	707	1216.74	494.725	420	13	418	96.67	UNIPROTKB|Q9KRG6 - symbol:VC_1676 "Phage shock protein C" species:243277 "Vibrio cholerae O1 biovar El Tor str. N16961" [GO:0009271 "phage shock" evidence=ISS] GO:GO:0016021 EMBL:AE003852 Proteomes:UP000000584 GO:GO:0009271 eggNOG:ENOG4105FM1 eggNOG:COG1983 KO:K03973 InterPro:IPR014320 InterPro:IPR007168 Pfam:PF04024 TIGRFAMs:TIGR02978 PIR:F82169 RefSeq:NP_231312.1 RefSeq:WP_001881462.1 STRING:24…	138	4	138	97.83	195.3	7e-49	90/135	66	114/135	84	0/135	0	1
gene1241	NC_004603.1	1254784	1255431	-	protein_coding	VP1194	.	1188699	.	NP_797573.1	hypothetical protein	2.01982	4.60334	0.00170315	0.010483	5.02229	4.05104	4.05104	5.02229	47	121	21.2898	54.8788	648	1	646	99.69	UNIPROTKB|Q9KRH6 - symbol:VC_1666 "ABC transporter, ATP-binding protein, putative" species:243277 "Vibrio cholerae O1 biovar El Tor str. N16961" [GO:0006810 "transport" evidence=ISS] [GO:0042626 "ATPase activity, coupled to transmembrane movement of substances" evidence=ISS] InterPro:IPR003439 Pfam:PF00005 PROSITE:PS50893 InterPro:IPR003593 InterPro:IPR027417 SUPFAM:SSF52540 GO:GO:0005524 EMBL:AE…	220	1	220	100	289.3	6e-77	145/220	65	172/220	78	5/220	2	1
gene1252	NC_004603.1	1266582	1266947	-	protein_coding	VP1205	.	1188710	.	NP_797584.1	hypothetical protein	-2.13601	8.29197	4.40866e-07	6.36004e-06	7.64863	8.73986	8.73986	7.64863	1287	767	1032.16	615.897	366	145	358	58.47	UNIPROTKB|Q9KRI1 - symbol:VC_1661 "Uncharacterized protein" species:243277 "Vibrio cholerae O1 biovar El Tor str. N16961" [GO:0003674 "molecular_function" evidence=ND] [GO:0005575 "cellular_component" evidence=ND] [GO:0008150 "biological_process" evidence=ND] EMBL:AE003852 Proteomes:UP000000584 PIR:F82172 RefSeq:NP_231297.1 RefSeq:WP_001881452.1 STRING:243277.VC1661 DNASU:2613792 EnsemblBacteria:…	73	3	72	95.89	81.6	1e-14	38/72	52	53/72	73	3/72	4	1
gene1267	NC_004603.1	1281723	1283987	-	protein_coding	VP1220	.	1188725	.	NP_797599.1	83 kDa decaheme outer membrane cytochrome c	-2.28163	7.82474	7.33292e-08	1.2261e-06	7.11861	8.30304	8.30304	7.11861	950	530	123.113	68.7704	2265	922	2251	58.72	UNIPROTKB|Q8EG32 - symbol:mtrF "Extracellular respiratory system surface decaheme cytochrome c component MtrF" species:211586 "Shewanella oneidensis MR-1" [GO:0009055 "electron transfer activity" evidence=ISS] GO:GO:0009055 GO:GO:0046872 EMBL:AE014299 Proteomes:UP000008186 InterPro:IPR036280 SUPFAM:SSF48695 InterPro:IPR011031 PROSITE:PS51008 HOGENOM:HOG000293861 InterPro:IPR020014 TIGRFAMs:TIGR03…	639	242	638	62.13	100.1	2e-19	111/473	23	172/473	36	106/473	22	1
gene1273	NC_004603.1	1289445	1291955	+	protein_coding	VP1226	.	1188731	.	NP_797605.1	hypothetical protein	2.07199	6.21203	2.53592e-05	0.000261409	6.64271	5.60653	5.60653	6.64271	144	380	16.8331	44.4765	2511	1	2509	99.92	UNIPROTKB|Q9KRL1 - symbol:VC_1629 "Uncharacterized protein" species:243277 "Vibrio cholerae O1 biovar El Tor str. N16961" [GO:0003674 "molecular_function" evidence=ND] [GO:0005575 "cellular_component" evidence=ND] [GO:0008150 "biological_process" evidence=ND] InterPro:IPR003838 Pfam:PF02687 GO:GO:0016021 EMBL:AE003852 Proteomes:UP000000584 eggNOG:COG0577 KO:K02004 eggNOG:ENOG4107Y7R PIR:D82177 Re…	836	1	836	100	1199.1	0	570/836	68	697/836	83	0/836	0	1
gene1288	NC_004603.1	1309096	1309230	-	protein_coding	VP1242	.	1188746	.	NP_797620.1	hypothetical protein	2.16533	2.91774	0.0339961	0.120218	3.37454	2.40825	2.40825	3.37454	13	36	28.2656	78.3723	135				No hit
gene1289	NC_004603.1	1309223	1309810	+	protein_coding	VP1241	.	1188747	.	NP_797621.1	hypothetical protein	2.59903	9.93601	7.09654e-11	1.80473e-09	10.4661	9.08969	9.08969	10.4661	1641	5430	819.18	2714.04	588	1	586	99.66	UNIPROTKB|Q9KSV3 - symbol:VC_1153 "Uncharacterized protein" species:243277 "Vibrio cholerae O1 biovar El Tor str. N16961" [GO:0003674 "molecular_function" evidence=ND] [GO:0005575 "cellular_component" evidence=ND] [GO:0008150 "biological_process" evidence=ND] EMBL:AE003852 Proteomes:UP000000584 eggNOG:COG3070 KO:K07343 InterPro:IPR007077 InterPro:IPR007076 InterPro:IPR026256 Pfam:PF04994 Pfam:PF0…	202	6	200	96.53	283.5	3e-75	134/195	68	159/195	81	0/195	0	1
gene1291	NC_004603.1	1310727	1311224	-	protein_coding	VP1244	.	1188749	.	NP_797623.1	response regulator	2.41589	8.2222	6.56746e-09	1.30948e-07	8.72176	7.45386	7.45386	8.72176	526	1618	310.031	954.868	498	1	496	99.6	UNIPROTKB|Q9KSV1 - symbol:VC_1155 "Response regulator" species:243277 "Vibrio cholerae O1 biovar El Tor str. N16961" [GO:0000156 "phosphorelay response regulator activity" evidence=ISS] [GO:0000160 "phosphorelay signal transduction system" evidence=ISS] InterPro:IPR001789 Pfam:PF00072 PROSITE:PS50110 SMART:SM00448 EMBL:AE003852 Proteomes:UP000000584 GO:GO:0005622 GO:GO:0000160 CDD:cd00156 InterPr…	181	17	181	91.16	240	3e-62	118/165	71	138/165	83	0/165	0	1
gene1292	NC_004603.1	1311221	1313161	-	protein_coding	VP1245	.	1188750	.	NP_797624.1	response regulator	2.66427	7.39146	7.26432e-10	1.64104e-08	7.93	6.52572	6.52572	7.93	275	933	41.5868	141.27	1941	679	1921	64.04	UNIPROTKB|Q9KSV0 - symbol:VC_1156 "Sensor histidine kinase" species:243277 "Vibrio cholerae O1 biovar El Tor str. N16961" [GO:0000155 "phosphorelay sensor kinase activity" evidence=ISS] [GO:0000160 "phosphorelay signal transduction system" evidence=ISS] InterPro:IPR003661 InterPro:IPR004358 InterPro:IPR036097 Pfam:PF00512 PRINTS:PR00344 InterPro:IPR003594 InterPro:IPR000595 Pfam:PF00027 Pfam:PF02…	431	7	420	96.06	543.1	7e-153	275/414	66	324/414	78	0/414	0	1
gene1303	NC_004603.1	1327132	1328502	-	protein_coding	VP1256	.	1188761	.	NP_797635.1	NadC family protein	2.47391	7.03333	2.23094e-08	4.04905e-07	7.54184	6.246	6.246	7.54184	226	712	48.3859	152.629	1371	10	1369	99.2	UNIPROTKB|Q9KNE0 - symbol:VC_A0025 "Transporter, NadC family" species:243277 "Vibrio cholerae O1 biovar El Tor str. N16961" [GO:0005215 "transporter activity" evidence=ISS;IBA] [GO:0006810 "transport" evidence=ISS] [GO:0016021 "integral component of membrane" evidence=IBA] [GO:0098656 "anion transmembrane transport" evidence=IBA] InterPro:IPR001898 Pfam:PF00939 Prosite:PS01271 GO:GO:0016021 GO:GO…	462	9	461	98.05	645.2	9e-184	316/453	69	381/453	84	0/453	0	1
gene1306	NC_004603.1	1331538	1333892	+	protein_coding	VP1259	.	1188764	.	NP_797638.1	ATP-dependent helicase	2.07441	6.85763	7.37428e-06	8.41897e-05	7.28918	6.246	6.246	7.28918	226	597	28.1686	74.5036	2355	1	1777	75.46	UNIPROTKB|Q7UT94 - symbol:hrpB "ATP-dependent helicase" species:243090 "Rhodopirellula baltica SH 1" [GO:0004004 "ATP-dependent RNA helicase activity" evidence=IBA] [GO:0005737 "cytoplasm" evidence=IBA] [GO:0006396 "RNA processing" evidence=IBA] InterPro:IPR007502 InterPro:IPR010225 InterPro:IPR011545 Pfam:PF00270 Pfam:PF04408 SMART:SM00847 InterPro:IPR001650 Pfam:PF00271 InterPro:IPR027417 SUPFA…	846	18	621	71.39	233.8	1e-59	198/626	31	311/626	49	56/626	8	1
gene1308	NC_004603.1	1335073	1335450	+	protein_coding	VP1261	.	1188766	.	NP_797640.1	hypothetical protein	-2.60151	4.94577	3.88095e-06	4.68249e-05	4.16355	5.49433	5.49433	4.16355	133	65	103.278	50.5377	378	31	373	90.74	UNIPROTKB|Q9KSR7 - symbol:VC_1189 "Uncharacterized protein" species:243277 "Vibrio cholerae O1 biovar El Tor str. N16961" [GO:0003674 "molecular_function" evidence=ND] [GO:0005575 "cellular_component" evidence=ND] [GO:0008150 "biological_process" evidence=ND] EMBL:AE003852 Proteomes:UP000000584 PIR:E82229 RefSeq:NP_230834.1 RefSeq:WP_001880964.1 STRING:243277.VC1189 DNASU:2614622 EnsemblBacteria:…	140	26	139	81.43	127.9	1e-28	58/114	50	85/114	74	0/114	0	1
gene1328	NC_004603.1	1359806	1360000	+	protein_coding	VP1281	.	1188786	rpmI	NP_797660.1	50S ribosomal protein L35	-2.43565	12.6175	6.68467e-10	1.51817e-08	11.8372	13.1213	13.1213	11.8372	26884	14052	40467.6	21178.6	195	1	193	98.97	TIGR_CMR|VC_A0289 - symbol:VC_A0289 "ribosomal protein L35" species:686 "Vibrio cholerae O1 biovar El Tor" [GO:0003735 "structural constituent of ribosome" evidence=ISS] [GO:0006412 "translation" evidence=ISS] HAMAP:MF_00514 InterPro:IPR001706 InterPro:IPR018265 InterPro:IPR021137 Pfam:PF01632 PRINTS:PR00064 PROSITE:PS00936 GO:GO:0006412 Proteomes:UP000000584 EMBL:AE003853 GO:GO:0003735 GO:GO:002…	64	1	64	100	125.9	3e-28	60/64	93	62/64	96	0/64	0	1
gene1329	NC_004603.1	1360041	1360394	+	protein_coding	VP1282	.	1188787	rplT	NP_797661.1	50S ribosomal protein L20	-2.32375	13.3808	4.57268e-09	9.29195e-08	12.6482	13.8645	13.8645	12.6482	45004	24656	37316.1	20469.8	354	1	352	99.44	UNIPROTKB|P0A479 - symbol:rplT "50S ribosomal protein L20" species:243277 "Vibrio cholerae O1 biovar El Tor str. N16961" [GO:0000027 "ribosomal large subunit assembly" evidence=IBA] [GO:0003735 "structural constituent of ribosome" evidence=ISS;IBA] [GO:0006412 "translation" evidence=ISS] [GO:0022625 "cytosolic large ribosomal subunit" evidence=IBA] HAMAP:MF_00382 InterPro:IPR005813 Pfam:PF00453 P…	117	1	117	100	221.9	6e-57	114/117	97	115/117	98	0/117	0	1
gene1377	NC_004603.1	1409960	1410961	-	protein_coding	VP1330	.	1188835	.	NP_797709.1	hydroxyproline-2-epimerase	2.24313	3.65575	0.00433438	0.0228672	4.12101	3.05155	3.05155	4.12101	22	63	6.44471	18.4785	1002	1	997	99.5	UNIPROTKB|A3QFI1 - symbol:Shew_2363 "4-hydroxyproline 2-epimerase" species:323850 "Shewanella loihica PV-4" [GO:0047580 "4-hydroxyproline epimerase activity" evidence=IDA] InterPro:IPR008794 Pfam:PF05544 eggNOG:ENOG4105CTU eggNOG:COG3938 HOGENOM:HOG000084336 GO:GO:0047580 PANTHER:PTHR33442 PIRSF:PIRSF029792 SFLD:SFLDS00028 KO:K12658 OMA:RHAMAIH OrthoDB:POG091H0FIS EMBL:CP000606 RefSeq:WP_01186616…	333	1	332	99.7	479.2	6e-134	223/332	67	267/332	80	0/332	0	1
gene1382	NC_004603.1	1414636	1415550	+	protein_coding	VP1335	.	1188840	.	NP_797714.1	dihydrodipicolinate synthetase	2.70523	4.66847	7.84218e-06	8.88153e-05	5.20647	3.83353	3.83353	5.20647	40	138	12.8318	44.3253	915	1	913	99.78	UNIPROTKB|Q485S4 - symbol:CPS_1449 "Dihydrodipicolinate synthetase family protein" species:167879 "Colwellia psychrerythraea 34H" [GO:0016829 "lyase activity" evidence=ISM] InterPro:IPR002220 InterPro:IPR013785 Pfam:PF00701 PIRSF:PIRSF001365 PRINTS:PR00146 SMART:SM01130 Gene3D:3.20.20.70 GO:GO:0016829 GO:GO:0008152 EMBL:CP000083 Proteomes:UP000000547 eggNOG:COG0329 HOGENOM:HOG000173604 PANTHER:PT…	304	1	303	99.67	384.4	2e-105	192/304	63	239/304	78	1/304	0	1
gene1423	NC_004603.1	1457257	1458732	+	protein_coding	VP1374	.	1188881	.	NP_797753.1	transporter	3.16708	5.23003	1.66499e-08	3.08786e-07	5.82547	4.21449	4.21449	5.82547	53	214	10.5399	42.611	1476	16	1468	98.44	UNIPROTKB|Q9KSE3 - symbol:VC_1314 "Transporter, putative" species:243277 "Vibrio cholerae O1 biovar El Tor str. N16961" [GO:0005215 "transporter activity" evidence=ISS;IBA] [GO:0006810 "transport" evidence=ISS] [GO:0016021 "integral component of membrane" evidence=IBA] [GO:0098656 "anion transmembrane transport" evidence=IBA] InterPro:IPR001898 Pfam:PF00939 GO:GO:0016021 EMBL:AE003852 Proteomes:U…	487	4	487	99.38	785.8	5e-226	390/484	80	437/484	90	0/484	0	1
gene1424	NC_004603.1	1458736	1460073	+	protein_coding	VP1375	.	1188882	.	NP_797754.1	sensor histidine kinase	3.29365	5.78227	2.77419e-10	6.51106e-09	6.39302	4.71078	4.71078	6.39302	76	319	16.6727	70.0694	1338	10	1333	98.95	UNIPROTKB|Q9KSE2 - symbol:VC_1315 "Sensor histidine kinase" species:243277 "Vibrio cholerae O1 biovar El Tor str. N16961" [GO:0000155 "phosphorelay sensor kinase activity" evidence=ISS] [GO:0000160 "phosphorelay signal transduction system" evidence=ISS] InterPro:IPR004358 PRINTS:PR00344 InterPro:IPR003594 InterPro:IPR000595 Pfam:PF00027 Pfam:PF02518 InterPro:IPR005467 Gene3D:2.60.120.10 InterPro:…	449	2	442	98.22	646.7	3e-184	315/441	71	382/441	86	0/441	0	1
gene1425	NC_004603.1	1460060	1460533	+	protein_coding	VP1376	.	1188883	.	NP_797755.1	chemotaxis protein CheY	2.58827	6.82383	8.06088e-09	1.58493e-07	7.3503	5.99178	5.99178	7.3503	189	623	117.039	386.281	474	1	472	99.58	UNIPROTKB|Q9KSE1 - symbol:VC_1316 "Chemotaxis protein CheY, putative" species:243277 "Vibrio cholerae O1 biovar El Tor str. N16961" [GO:0004871 "signal transducer activity" evidence=ISS] [GO:0006935 "chemotaxis" evidence=ISS] InterPro:IPR001789 Pfam:PF00072 PROSITE:PS50110 SMART:SM00448 EMBL:AE003852 Proteomes:UP000000584 GO:GO:0005622 GO:GO:0004871 GO:GO:0006935 GO:GO:0000160 CDD:cd00156 InterPr…	158	1	157	99.37	247.3	2e-64	115/157	73	136/157	86	0/157	0	1
gene1432	NC_004603.1	1468883	1469635	+	protein_coding	VP1383	.	1188890	.	NP_797762.1	hypothetical protein	-2.34125	6.0352	1.07476e-06	1.43538e-05	5.32364	6.5309	6.5309	5.32364	276	150	107.588	58.5451	753	1	697	92.56	UNIPROTKB|P43932 - symbol:HI_0056 "UPF0053 protein HI_0056" species:71421 "Haemophilus influenzae Rd KW20" [GO:0005886 "plasma membrane" evidence=IBA] InterPro:IPR005496 Pfam:PF03741 GO:GO:0016021 GO:GO:0005886 EMBL:L42023 Proteomes:UP000000579 eggNOG:COG0861 PIR:D64000 RefSeq:NP_438229.1 RefSeq:WP_005693866.1 STRING:71421.HI0056 EnsemblBacteria:AAC21734 GeneID:950954 KEGG:hin:HI0056 PATRIC:fig|7…	237	1	233	98.31	216.1	7e-55	110/233	47	158/233	67	1/233	0	1
gene1434	NC_004603.1	1469834	1470808	-	protein_coding	VP1385	.	1188892	.	NP_797764.1	hypothetical protein	-3.50723	4.77044	1.00574e-08	1.9504e-07	3.69761	5.42925	5.42925	3.69761	127	46	38.2338	13.8659	975	229	961	75.18	UNIPROTKB|Q9KN86 - symbol:VC_A0079 "Uncharacterized protein" species:243277 "Vibrio cholerae O1 biovar El Tor str. N16961" [GO:0003674 "molecular_function" evidence=ND] [GO:0005575 "cellular_component" evidence=ND] [GO:0008150 "biological_process" evidence=ND] Pfam:PF01551 Proteomes:UP000000584 EMBL:AE003853 Gene3D:3.10.350.10 InterPro:IPR036779 InterPro:IPR011055 InterPro:IPR016047 SUPFAM:SSF512…	430	171	420	58.14	168.3	2e-40	90/253	35	145/253	57	12/253	4	1
gene1442	NC_004603.1	1495971	1496489	+	protein_coding	VP1393	.	1188900	.	NP_797772.1	BfdA protein	-3.31337	4.98849	9.84523e-09	1.91801e-07	3.96141	5.62602	5.62602	3.96141	146	56	82.5722	31.7113	519	1	517	99.61	UNIPROTKB|P72350 - symbol:hcp "Haemolysin co-regulated protein" species:666 "Vibrio cholerae" [GO:0008150 "biological_process" evidence=ND] eggNOG:COG3157 Gene3D:2.30.110.20 InterPro:IPR036624 InterPro:IPR008514 Pfam:PF05638 SUPFAM:SSF141452 TIGRFAMs:TIGR03344 EMBL:CP024162 Proteomes:UP000192124 EMBL:CP007653 Proteomes:UP000036184 EMBL:CP007654 EMBL:CP024163 Proteomes:UP000028620 Proteomes:UP0001…	172	1	172	100	192.6	6e-48	91/172	52	122/172	70	0/172	0	1
gene1447	NC_004603.1	1500517	1501509	+	protein_coding	VP1398	.	1188905	.	NP_797777.1	hypothetical protein	2.86043	4.6178	4.27758e-06	5.08876e-05	5.17563	3.72924	3.72924	5.17563	37	135	10.9371	39.9557	993	61	907	85.3	UNIPROTKB|Q4KCC5 - symbol:PFL_3002 "Uncharacterized protein" species:220664 "Pseudomonas protegens Pf-5" [GO:0003674 "molecular_function" evidence=ND] [GO:0005575 "cellular_component" evidence=ND] [GO:0008150 "biological_process" evidence=ND] EMBL:CP000076 Proteomes:UP000008540 RefSeq:WP_011061290.1 STRING:220664.PFL_3002 EnsemblBacteria:AAY92274 KEGG:pfl:PFL_3002 PATRIC:fig|220664.5.peg.3062 egg…	370	18	317	81.08	120.9	4e-26	94/303	31	142/303	46	24/303	7	1
gene1458	NC_004603.1	1515461	1516771	-	protein_coding	VP1409	.	1188916	.	NP_797788.1	hypothetical protein	-2.11965	4.88893	0.00031495	0.00247702	4.30325	5.3494	5.3494	4.30325	120	72	26.8675	16.1408	1311				No hit
gene1476	NC_004603.1	1533464	1534588	+	protein_coding	VP1427	.	1188934	.	NP_797806.1	hypothetical protein	4.77288	9.30702	1.79753e-24	1.27235e-22	10.0316	7.78176	7.78176	10.0316	661	4017	172.464	1049.41	1125	16	1099	96.36	UNIPROTKB|Q9KPM7 - symbol:VC_2340 "Uncharacterized protein" species:243277 "Vibrio cholerae O1 biovar El Tor str. N16961" [GO:0003674 "molecular_function" evidence=ND] [GO:0005575 "cellular_component" evidence=ND] [GO:0008150 "biological_process" evidence=ND] InterPro:IPR003607 CDD:cd00077 EMBL:AE003852 Proteomes:UP000000584 Gene3D:3.30.450.40 InterPro:IPR029016 SUPFAM:SSF55781 eggNOG:COG2206 Int…	384	12	374	94.53	215.7	1e-54	125/367	34	193/367	52	10/367	2	1
gene1494	NC_004603.1	1553830	1554177	-	protein_coding	VP1445	.	1188952	.	NP_797824.1	hypothetical protein	-2.28168	5.70161	6.51952e-06	7.56266e-05	5.02229	6.18816	6.18816	5.02229	217	121	183.033	102.188	348	1	331	95.11	UNIPROTKB|Q9KS79 - symbol:VC_1380 "Uncharacterized protein" species:243277 "Vibrio cholerae O1 biovar El Tor str. N16961" [GO:0003674 "molecular_function" evidence=ND] [GO:0005575 "cellular_component" evidence=ND] [GO:0008150 "biological_process" evidence=ND] EMBL:AE003852 Proteomes:UP000000584 PIR:D82207 RefSeq:NP_231024.1 RefSeq:WP_000647617.1 STRING:243277.VC1380 DNASU:2614834 EnsemblBacteria:…	116	1	110	94.83	140.6	2e-32	65/110	59	90/110	81	0/110	0	1
gene1496	NC_004603.1	1556226	1558673	+	protein_coding	VP1447	.	1188954	.	NP_797826.1	anaerobic dimethyl sulfoxide reductase subunit A	2.06092	3.37656	0.0187995	0.0765497	3.80899	2.86726	2.86726	3.80899	19	50	2.27819	6.00278	2448	25	2419	97.83	UNIPROTKB|P18775 - symbol:dmsA "dimethyl sulfoxide reductase subunit A" species:83333 "Escherichia coli K-12" [GO:0031237 "intrinsic component of periplasmic side of plasma membrane" evidence=IDA] [GO:0048037 "cofactor binding" evidence=IMP] [GO:0009389 "dimethyl sulfoxide reductase activity" evidence=IGI] [GO:0005515 "protein binding" evidence=IPI] [GO:0009390 "dimethyl sulfoxide reductase compl…	814	14	811	98.03	1079.3	0	518/801	64	631/801	78	6/801	0	1
gene1498	NC_004603.1	1559302	1560153	+	protein_coding	VP1449	.	1188956	.	NP_797828.1	anaerobic dimethyl sulfoxide reductase subunit C	3.69402	2.81829	0.00125538	0.0081151	3.4452	1.8684	1.8684	3.4452	8	38	2.75612	13.108	852	7	847	98.71	UNIPROTKB|P18777 - symbol:dmsC "dimethyl sulfoxide reductase subunit C" species:83333 "Escherichia coli K-12" [GO:0005887 "integral component of plasma membrane" evidence=ISM] [GO:0005886 "plasma membrane" evidence=IDA] [GO:0009390 "dimethyl sulfoxide reductase complex" evidence=IDA] [GO:0009389 "dimethyl sulfoxide reductase activity" evidence=IDA] [GO:0016021 "integral component of membrane" evi…	287	6	283	96.86	169.1	1e-40	103/284	36	166/284	58	10/284	3	1
gene1503	NC_004603.1	1566339	1566818	+	protein_coding	VP1454	.	1188961	.	NP_797833.1	hypothetical protein	-3.20349	7.32214	3.69354e-13	1.19744e-11	6.26702	7.9342	7.9342	6.26702	735	292	449.463	178.787	480	1	478	99.58	UNIPROTKB|Q9KS75 - symbol:VC_1384 "Uncharacterized protein" species:243277 "Vibrio cholerae O1 biovar El Tor str. N16961" [GO:0003674 "molecular_function" evidence=ND] [GO:0005575 "cellular_component" evidence=ND] [GO:0008150 "biological_process" evidence=ND] InterPro:IPR011250 GO:GO:0016021 EMBL:AE003852 Proteomes:UP000000584 Gene3D:2.40.160.20 InterPro:IPR027385 Pfam:PF13505 SUPFAM:SSF56925 PIR…	160	1	160	100	239.6	4e-62	112/160	70	129/160	80	1/160	0	1
gene1507	NC_004603.1	1570071	1570709	-	protein_coding	VP1458	.	1188965	.	NP_797837.1	hypothetical protein	-2.11317	2.95616	0.0388023	0.132577	2.50734	3.45184	3.45184	2.50734	30	18	13.7806	8.27877	639	40	634	93.11	UNIPROTKB|Q74BQ5 - symbol:GSU1986 "Undecaprenyl-phosphate glycosylphosphotransferase" species:243231 "Geobacter sulfurreducens PCA" [GO:0003674 "molecular_function" evidence=ND] [GO:0008150 "biological_process" evidence=ND] Pfam:PF02397 GO:GO:0016021 EMBL:AE017180 Proteomes:UP000000577 GO:GO:0009242 eggNOG:ENOG4105D3Q eggNOG:COG2148 HOGENOM:HOG000153661 InterPro:IPR003362 GO:GO:0089702 InterPro:I…	452	263	450	41.59	174.9	2e-42	92/198	46	133/198	67	10/198	5	1
gene1515	NC_004603.1	1578714	1579886	-	protein_coding	VP1466	.	1188973	.	NP_797845.1	hypothetical protein	-2.11148	4.52879	0.000841501	0.00573652	3.96141	4.99191	4.99191	3.96141	93	56	23.272	14.0308	1173				No hit
gene1516	NC_004603.1	1579897	1581081	-	protein_coding	VP1467	.	1188974	.	NP_797846.1	galactosyltransferase	-3.37501	4.45712	2.7933e-07	4.20973e-06	3.4452	5.10737	5.10737	3.4452	101	38	25.0179	9.42452	1185	55	1063	85.15	TIGR_CMR|BA_5670 - symbol:BA_5670 "glycosyl transferase, group 1 family protein" species:198094 "Bacillus anthracis str. Ames" [GO:0000271 "polysaccharide biosynthetic process" evidence=ISS] [GO:0016757 "transferase activity, transferring glycosyl groups" evidence=ISS] InterPro:IPR001296 Pfam:PF00534 CAZy:GT4 EMBL:AE017334 Proteomes:UP000000594 GO:GO:0016740 eggNOG:COG0438 InterPro:IPR028098 Pfam…	366	14	348	91.53	83.6	9e-15	82/352	23	160/352	45	33/352	9	1
gene1525	NC_004603.1	1588200	1588520	-	protein_coding	VP1476	.	1188983	.	NP_797855.1	anti-sigma F factor antagonist	-3.70232	3.96735	6.87178e-07	9.60014e-06	2.90841	4.65494	4.65494	2.90841	73	25	66.7523	22.8891	321	13	247	73.21	UNIPROTKB|A5I6H0 - symbol:spoIIAA "Anti-sigma F factor antagonist" species:441771 "Clostridium botulinum A str. Hall" [GO:0005887 "integral component of plasma membrane" evidence=IBA] [GO:0015116 "sulfate transmembrane transporter activity" evidence=IBA] InterPro:IPR003658 InterPro:IPR014237 GO:GO:0006355 EMBL:AM412317 Proteomes:UP000001986 GO:GO:0030435 Gene3D:3.30.750.24 InterPro:IPR002645 Inte…	111	4	81	70.27	49.3	5e-05	23/78	29	45/78	57	0/78	0	1
gene1530	NC_004603.1	1593738	1594604	-	protein_coding	VP1481	.	1188988	.	NP_797860.1	hypothetical protein	2.7157	9.50431	1.28933e-11	3.60248e-10	10.0516	8.6125	8.6125	10.0516	1178	4073	398.818	1380.67	867	1	865	99.77	UNIPROTKB|Q9KRU5 - symbol:VC_1539 "Uncharacterized protein VC_1539" species:243277 "Vibrio cholerae O1 biovar El Tor str. N16961" [GO:0003674 "molecular_function" evidence=ND] [GO:0005575 "cellular_component" evidence=ND] [GO:0008150 "biological_process" evidence=ND] [GO:0016301 "kinase activity" evidence=IBA] InterPro:IPR011009 Pfam:PF03881 EMBL:AE003852 Proteomes:UP000000584 SUPFAM:SSF56112 GO:…	288	1	288	100	421	2e-116	189/288	65	235/288	81	0/288	0	1
gene1537	NC_004603.1	1600746	1601243	-	protein_coding	VP1489	.	1188995	.	NP_797867.1	hypothetical protein	2.14955	2.80609	0.0387935	0.132577	3.2616	2.31525	2.31525	3.2616	12	33	7.07294	19.475	498				No hit
gene1549	NC_004603.1	1609632	1610450	-	protein_coding	VP1501	.	1189007	.	NP_797879.1	hypothetical protein	-2.11042	9.47916	3.20386e-07	4.77431e-06	8.84448	9.92042	9.92042	8.84448	2921	1762	1046.88	632.289	819	1	817	99.76	UNIPROTKB|Q9KRW1 - symbol:VC_1523 "Uncharacterized protein" species:243277 "Vibrio cholerae O1 biovar El Tor str. N16961" [GO:0003674 "molecular_function" evidence=ND] [GO:0005575 "cellular_component" evidence=ND] [GO:0008150 "biological_process" evidence=ND] EMBL:AE003852 Proteomes:UP000000584 InterPro:IPR024370 Pfam:PF12849 eggNOG:ENOG4105C8W eggNOG:COG2998 KO:K05772 OMA:LADRGTW PIR:A82188 RefS…	275	5	275	98.55	438.3	1e-121	210/272	77	239/272	87	1/272	0	1
gene1573	NC_004603.1	1636144	1636869	+	protein_coding	VP1524	.	1189031	.	NP_797903.1	NAD-dependent deacetylase	-2.40909	6.58094	1.25241e-07	1.99213e-06	5.83208	7.08623	7.08623	5.83208	407	215	164.553	87.0354	726	1	724	99.72	TIGR_CMR|VC_1509 - symbol:VC_1509 "cobB protein" species:686 "Vibrio cholerae O1 biovar El Tor" [GO:0008152 "metabolic process" evidence=ISS] [GO:0019213 "deacetylase activity" evidence=ISS] HAMAP:MF_01121 InterPro:IPR003000 InterPro:IPR027546 Pfam:PF02146 GO:GO:0005737 GO:GO:0070403 GO:GO:0046872 EMBL:AE003852 Proteomes:UP000000584 Gene3D:3.40.50.1220 InterPro:IPR029035 SUPFAM:SSF52467 Gene3D:3.…	246	1	241	97.97	419.1	5e-116	198/241	82	221/241	91	0/241	0	1
gene1636	NC_004603.1	1680424	1680798	-	protein_coding	VP1587	.	1189094	.	NP_797966.1	hypothetical protein	-3.72395	1.57285	0.0264707	0.0996641	1.02946	2.31525	2.31525	1.02946	12	4	9.39287	3.13489	375	16	367	93.87	UNIPROTKB|Q9KS04 - symbol:VC_1479 "Uncharacterized protein" species:243277 "Vibrio cholerae O1 biovar El Tor str. N16961" [GO:0003674 "molecular_function" evidence=ND] [GO:0005575 "cellular_component" evidence=ND] [GO:0008150 "biological_process" evidence=ND] EMBL:AE003852 Proteomes:UP000000584 PIR:H82193 RefSeq:NP_231120.1 RefSeq:WP_001881271.1 STRING:243277.VC1479 DNASU:2613985 EnsemblBacteria:…	119	4	118	96.64	89.7	4e-17	44/118	37	75/118	63	4/118	3	1
gene1640	NC_004603.1	1683514	1683633	-	protein_coding	VP1592	.	1189098	.	NP_797970.1	hypothetical protein	-4.09902	1.33573	0.0267805	0.100652	0.832647	2.10906	2.10906	0.832647	10	3	24.4606	7.34741	120	85	1	70.83	UNIPROTKB|Q9KS00 - symbol:fabA "3-hydroxydecanoyl-[acyl-carrier-protein] dehydratase" species:243277 "Vibrio cholerae O1 biovar El Tor str. N16961" [GO:0006633 "fatty acid biosynthetic process" evidence=ISS] [GO:0008693 "3-hydroxydecanoyl-[acyl-carrier-protein] dehydratase activity" evidence=ISS] HAMAP:MF_00405 InterPro:IPR010083 UniPathway:UPA00094 GO:GO:0005737 InterPro:IPR029069 SUPFAM:SSF5463…	172	1	28	16.28	57.8	5e-08	26/28	92	27/28	96	0/28	0	-1
gene1654	NC_004603.1	1701314	1702015	-	protein_coding	VP1605	.	1189112	.	NP_797984.1	hypothetical protein	-2.04323	6.69703	1.24165e-05	0.00013556	6.10732	7.12784	7.12784	6.10732	419	261	175.196	109.269	702	1	694	98.86	UNIPROTKB|Q9KRY8 - symbol:VC_1495 "Uncharacterized protein" species:243277 "Vibrio cholerae O1 biovar El Tor str. N16961" [GO:0003674 "molecular_function" evidence=ND] [GO:0005575 "cellular_component" evidence=ND] [GO:0008150 "biological_process" evidence=ND] EMBL:AE003852 Proteomes:UP000000584 PIR:B82192 RefSeq:NP_231136.1 RefSeq:WP_001881299.1 STRING:243277.VC1495 DNASU:2614001 EnsemblBacteria:…	238	4	237	98.32	243	5e-63	124/237	52	160/237	67	9/237	3	1
gene1657	NC_004603.1	1704925	1705398	-	protein_coding	VP1608	.	1189115	.	NP_797987.1	hypothetical protein	-2.38388	5.62174	2.65191e-06	3.29317e-05	4.90184	6.1279	6.1279	4.90184	208	111	128.805	68.8238	474	1	472	99.58	UNIPROTKB|Q9KRY5 - symbol:VC_1498 "Uncharacterized protein" species:243277 "Vibrio cholerae O1 biovar El Tor str. N16961" [GO:0003674 "molecular_function" evidence=ND] [GO:0005575 "cellular_component" evidence=ND] [GO:0008150 "biological_process" evidence=ND] InterPro:IPR003018 Pfam:PF13185 EMBL:AE003852 Proteomes:UP000000584 Gene3D:3.30.450.40 InterPro:IPR029016 SUPFAM:SSF55781 eggNOG:COG1956 OM…	192	36	192	81.77	256.1	4e-67	126/157	80	139/157	88	0/157	0	1
gene1676	NC_004603.1	1725860	1726132	-	protein_coding	VP1627	.	1189134	.	NP_798006.1	acylphosphatase	2.17676	5.87639	1.69761e-05	0.000180696	6.32906	5.22709	5.22709	6.32906	110	305	118.271	328.346	273	1	271	99.27	UNIPROTKB|Q9KSA4 - symbol:acyP "Acylphosphatase" species:243277 "Vibrio cholerae O1 biovar El Tor str. N16961" [GO:0003998 "acylphosphatase activity" evidence=ISS;IBA] InterPro:IPR020456 Pfam:PF00708 InterPro:IPR001792 EMBL:AE003852 Proteomes:UP000000584 KO:K01512 GO:GO:0003998 InterPro:IPR036046 InterPro:IPR017968 PANTHER:PTHR10029 SUPFAM:SSF54975 PROSITE:PS00150 PROSITE:PS00151 PROSITE:PS51160 …	91	1	91	100	127.1	2e-28	60/91	65	73/91	80	1/91	1	1
gene1705	NC_004603.1	1774890	1775894	-	protein_coding	VP1656	.	1189163	.	NP_798035.1	translocator protein PopD	2.17762	7.28714	8.77699e-07	1.20245e-05	7.74106	6.62594	6.62594	7.74106	295	818	86.1597	239.211	1005	289	1003	71.14	UNIPROTKB|G3XCM5 - symbol:popD "AopD protein" species:287 "Pseudomonas aeruginosa" [GO:0051087 "chaperone binding" evidence=IDA] PseudoCAP:PA1709 GO:GO:0016021 GO:GO:0051087 EMBL:CP012901 EMBL:NFFO01000035 EMBL:NFFZ01000022 EMBL:JPEA01000003 Proteomes:UP000194726 Proteomes:UP000194857 Proteomes:UP000226099 EMBL:AY232997 EMBL:CVWF01000219 PIR:B83433 RefSeq:WP_003113550.1 EnsemblBacteria:CRO38036 E…	295	63	295	78.98	132.1	2e-29	80/241	33	140/241	58	11/241	4	1
gene1706	NC_004603.1	1775906	1777105	-	protein_coding	VP1657	.	1189164	.	NP_798036.1	translocator protein PopB	7.79501	6.58418	5.49219e-28	4.66507e-26	7.40228	4.49452	4.49452	7.40228	65	646	15.8994	158.214	1200				No hit
gene1707	NC_004603.1	1777109	1777597	-	protein_coding	VP1658	.	1189165	.	NP_798037.1	low calcium response locus protein H	4.77711	4.18722	8.19431e-09	1.60374e-07	4.88922	2.8002	2.8002	4.88922	18	110	10.8047	66.1116	489	1	481	98.36	UNIPROTKB|Q9I325 - symbol:pcrH "Regulatory protein PcrH" species:208964 "Pseudomonas aeruginosa PAO1" [GO:0030254 "protein secretion by the type III secretion system" evidence=IMP] [GO:0051131 "chaperone-mediated protein complex assembly" evidence=IMP] InterPro:IPR005415 InterPro:IPR011990 InterPro:IPR013026 PRINTS:PR01595 PROSITE:PS50293 PseudoCAP:PA1707 EMBL:AE004091 Proteomes:UP000002438 GO:GO…	167	1	158	94.61	174.5	2e-42	87/160	54	115/160	71	2/160	1	1
gene1708	NC_004603.1	1777610	1779433	-	protein_coding	VP1659	.	1189166	.	NP_798038.1	hypothetical protein	4.9469	4.68148	3.41971e-11	9.07719e-10	5.39678	3.21494	3.21494	5.39678	25	158	4.02312	25.4581	1824	1258	1822	30.98	UNIPROTKB|G3XD49 - symbol:pcrV "Type III secretion protein PcrV" species:208964 "Pseudomonas aeruginosa PAO1" [GO:0030254 "protein secretion by the type III secretion system" evidence=IMP] [GO:0030257 "type III protein secretion system complex" evidence=IDA] InterPro:IPR005413 InterPro:IPR036139 Pfam:PF04792 PRINTS:PR01592 PseudoCAP:PA1706 GO:GO:0005615 GO:GO:0009405 EMBL:AE004091 Proteomes:UP000…	294	95	294	68.03	104.4	7e-21	72/201	35	111/201	55	14/201	6	1
gene1709	NC_004603.1	1779438	1779722	-	protein_coding	VP1660	.	1189167	.	NP_798039.1	hypothetical protein	17.0828	2.02962	8.47349e-05	0.000770597	2.8575	0.412954	0.412954	2.8575	1	24	1.02992	24.7492	285	25	283	90.88	UNIPROTKB|Q9I326 - symbol:pcrG "Regulator in type III secretion" species:208964 "Pseudomonas aeruginosa PAO1" [GO:0050709 "negative regulation of protein secretion" evidence=IMP] PseudoCAP:PA1705 EMBL:AE004091 Proteomes:UP000002438 GO:GO:0050709 InterPro:IPR009863 Pfam:PF07216 ProDom:PD020116 TIGRFAMs:TIGR02573 PIR:F83432 RefSeq:NP_250396.1 RefSeq:WP_003100790.1 STRING:208964.PA1705 PaxDb:Q9I326 …	98	16	98	84.69	65.9	5e-10	37/86	43	57/86	66	3/86	3	1
gene1710	NC_004603.1	1779783	1780196	-	protein_coding	VP1661	.	1189168	.	NP_798040.1	LcrR	6.38073	1.71053	0.0103193	0.0469606	2.43972	0.73363	0.73363	2.43972	2	17	1.41801	12.0682	414				No hit
gene1711	NC_004603.1	1780196	1782322	-	protein_coding	VP1662	.	1189169	.	NP_798041.1	low calcium response protein	3.49586	6.05625	6.35892e-12	1.80042e-10	6.68712	4.91476	4.91476	6.68712	88	392	12.144	54.1642	2127	10	2119	99.2	UNIPROTKB|Q9I327 - symbol:pcrD "Type III secretory apparatus protein PcrD" species:208964 "Pseudomonas aeruginosa PAO1" [GO:0050709 "negative regulation of protein secretion" evidence=IMP] InterPro:IPR001712 InterPro:IPR006302 Pfam:PF00771 PIRSF:PIRSF005419 PRINTS:PR00949 PseudoCAP:PA1703 GO:GO:0016021 EMBL:AE004091 Proteomes:UP000002438 GO:GO:0050709 GO:GO:0009306 InterPro:IPR025505 PANTHER:PTHR…	706	1	704	99.72	956.1	4e-277	492/704	69	588/704	83	1/704	0	1
gene1712	NC_004603.1	1782306	1782650	-	protein_coding	VP1663	.	1189170	.	NP_798042.1	YscY	4.94043	2.53096	0.000352577	0.00273247	3.2219	1.40982	1.40982	3.2219	5	32	4.25402	27.2599	345	25	319	85.51	UNIPROTKB|Q9I328 - symbol:PA1702 "Uncharacterized protein" species:208964 "Pseudomonas aeruginosa PAO1" [GO:0030254 "protein secretion by the type III secretion system" evidence=IMP] InterPro:IPR011990 InterPro:IPR013026 PROSITE:PS50293 PseudoCAP:PA1702 GO:GO:0005737 EMBL:AE004091 Proteomes:UP000002438 Gene3D:1.25.40.10 SUPFAM:SSF48452 GO:GO:0030254 PIR:C83432 RefSeq:NP_250393.1 RefSeq:WP_0031135…	109	10	104	87.16	60.8	2e-08	37/98	37	52/98	53	3/98	3	1
gene1713	NC_004603.1	1782656	1783036	-	protein_coding	VP1664	.	1189171	.	NP_798043.1	hypothetical protein	20.6211	2.25208	1.03095e-05	0.00011492	3.09579	0.412954	0.412954	3.09579	1	29	0.770412	22.3701	381				No hit
gene1715	NC_004603.1	1783391	1783675	-	protein_coding	VP1666	.	1189173	.	NP_798045.1	hypothetical protein	16.432	2.79491	4.82185e-08	8.25742e-07	3.63853	0.73363	0.73363	3.63853	2	44	2.05984	45.3734	285	1	262	91.93	UNIPROTKB|G3XCT8 - symbol:PA1699 "Uncharacterized protein" species:208964 "Pseudomonas aeruginosa PAO1" [GO:0050709 "negative regulation of protein secretion" evidence=IMP] PseudoCAP:PA1699 EMBL:AE004091 Proteomes:UP000002438 GO:GO:0050709 GO:GO:0030254 InterPro:IPR013351 TIGRFAMs:TIGR02511 PIR:H83431 RefSeq:WP_003087693.1 DNASU:877934 eggNOG:ENOG41071GJ eggNOG:ENOG410YYQB InterPro:IPR015144 Pfam…	92	1	87	94.57	89	5e-17	45/87	51	60/87	68	0/87	0	1
gene1716	NC_004603.1	1783656	1784549	-	protein_coding	VP1667	.	1189174	.	NP_798046.1	outer membrane protein PopN	4.44835	5.3165	8.92855e-13	2.72803e-11	6.01161	3.93079	3.93079	6.01161	43	244	14.1182	80.2133	894	97	892	89.04	UNIPROTKB|G3XCX6 - symbol:popN "Type III secretion outer membrane protein PopN" species:208964 "Pseudomonas aeruginosa PAO1" [GO:0050709 "negative regulation of protein secretion" evidence=IMP] InterPro:IPR010812 InterPro:IPR013401 Pfam:PF07201 PseudoCAP:PA1698 GO:GO:0009986 GO:GO:0009405 EMBL:AE004091 Proteomes:UP000002438 GO:GO:0050709 GO:GO:0019867 GO:GO:0030254 KO:K04058 TIGRFAMs:TIGR02568 PI…	288	27	288	90.97	200.3	5e-50	107/265	40	161/265	60	3/265	1	1
gene1717	NC_004603.1	1784736	1786058	+	protein_coding	VP1668	.	1189175	.	NP_798047.1	type III secretion system ATPase	3.43825	3.57322	6.4413e-05	0.00060256	4.18435	2.578	2.578	4.18435	15	66	3.32797	14.6615	1323	73	1312	93.73	UNIPROTKB|Q3BYK0 - symbol:hrcN "HrcN protein" species:316273 "Xanthomonas campestris pv. vesicatoria str. 85-10" [GO:0005515 "protein binding" evidence=IPI] InterPro:IPR000194 InterPro:IPR004100 InterPro:IPR005714 InterPro:IPR013380 InterPro:IPR020003 Pfam:PF00006 Pfam:PF02874 PROSITE:PS00152 InterPro:IPR003593 InterPro:IPR027417 SUPFAM:SSF52540 GO:GO:0005524 GO:GO:0005737 GO:GO:0006754 SMART:SM0…	442	26	438	93.44	470.7	3e-131	246/413	59	299/413	72	0/413	0	1
gene1719	NC_004603.1	1786526	1787866	+	protein_coding	VP1670	.	1189177	.	NP_798049.1	translocation protein in type III secretion	2.06454	4.00081	0.00541147	0.027491	4.43062	3.45184	3.45184	4.43062	30	79	6.5666	17.3138	1341	901	1330	32.07	UNIPROTKB|Q9I332 - symbol:pscP "Translocation protein in type III secretion" species:208964 "Pseudomonas aeruginosa PAO1" [GO:0030254 "protein secretion by the type III secretion system" evidence=ISS] InterPro:IPR013354 Pfam:PF02120 PseudoCAP:PA1695 GO:GO:0009405 EMBL:AE004091 Proteomes:UP000002438 GO:GO:0030254 InterPro:IPR021136 PIR:G83434 RefSeq:NP_250386.1 RefSeq:WP_010895580.1 PDB:5CUK PDBsu…	369	234	369	36.86	52.4	3e-05	41/145	28	70/145	48	11/145	7	1
gene1720	NC_004603.1	1787842	1788828	+	protein_coding	VP1671	.	1189178	.	NP_798050.1	hypothetical protein	7.55359	3.01283	5.63142e-07	7.89328e-06	3.78194	1.40982	1.40982	3.78194	5	49	1.48697	14.5906	987	28	961	94.63	UNIPROTKB|Q9ZA78 - symbol:yscQ "Type III secretion system protein" species:630 "Yersinia enterocolitica" [GO:0005515 "protein binding" evidence=IPI] InterPro:IPR003283 InterPro:IPR013385 PRINTS:PR01339 Pfam:PF01052 GO:GO:0030254 Gene3D:2.30.330.10 InterPro:IPR001543 InterPro:IPR036429 SUPFAM:SSF101801 KO:K03225 TIGRFAMs:TIGR02551 EMBL:AF102990 Proteomes:UP000039517 EMBL:AF336309 EMBL:AY150843 EMB…	307	4	301	97.07	109.8	1e-22	89/313	28	143/313	45	17/313	5	1
gene1721	NC_004603.1	1788825	1789475	+	protein_coding	VP1672	.	1189179	.	NP_798051.1	hypothetical protein	3.24955	2.09689	0.0211438	0.0839788	2.69302	1.40982	1.40982	2.69302	5	21	2.25443	9.48052	651	7	646	98.31	UNIPROTKB|Q3ADD2 - symbol:fliP "Flagellar biosynthetic protein FliP" species:246194 "Carboxydothermus hydrogenoformans Z-2901" [GO:0008565 "protein transporter activity" evidence=ISM] InterPro:IPR005837 InterPro:IPR005838 Pfam:PF00813 PRINTS:PR00951 PRINTS:PR01302 PROSITE:PS01060 PROSITE:PS01061 GO:GO:0016021 GO:GO:0005886 EMBL:CP000141 Proteomes:UP000002706 GO:GO:0009306 GO:GO:0044781 GO:GO:0009…	254	47	253	81.5	169.9	5e-41	91/215	42	137/215	63	10/215	4	1
gene1724	NC_004603.1	1790553	1791608	+	protein_coding	VP1675	.	1189182	.	NP_798054.1	translocation protein in type III secretion	2.52734	3.77326	0.00096388	0.00651847	4.28411	3.05155	3.05155	4.28411	22	71	6.11515	19.7601	1056	1	1024	96.97	UNIPROTKB|Q56844 - symbol:yscU "Putative type III secretion protein" species:630 "Yersinia enterocolitica" [GO:0005515 "protein binding" evidence=IPI] InterPro:IPR006135 InterPro:IPR006307 Pfam:PF01312 PRINTS:PR00950 GO:GO:0016021 GO:GO:0009306 Gene3D:3.40.1690.10 InterPro:IPR029025 PANTHER:PTHR30531 SUPFAM:SSF160544 TIGRFAMs:TIGR01404 EMBL:AF102990 RefSeq:NP_052408.1 RefSeq:WP_010891221.1 PDB:2V…	354	1	341	96.33	448.7	9e-125	216/341	63	280/341	82	0/341	0	1
gene1730	NC_004603.1	1796959	1797417	-	protein_coding	VP1682	.	1189188	.	NP_798060.1	hypothetical protein	16.3752	1.98052	0.000143701	0.00123411	2.80473	0.412954	0.412954	2.80473	1	23	0.639493	14.7268	459				No hit
gene1732	NC_004603.1	1797645	1798622	-	protein_coding	VP1683	.	1189190	.	NP_798062.1	hypothetical protein	4.2394	4.12515	8.89539e-08	1.45303e-06	4.79767	2.86726	2.86726	4.79767	19	103	5.70247	30.9523	978				No hit
gene1735	NC_004603.1	1799324	1800487	-	protein_coding	VP1686	.	1189193	.	NP_798065.1	adenosine monophosphate-protein transferase VopS	6.99204	5.72276	6.03581e-21	3.1647e-19	6.51712	3.7996	3.7996	6.51712	39	348	9.83467	87.8659	1164	1	1162	99.83	UNIPROTKB|Q87P32 - symbol:vopS "Adenosine monophosphate-protein transferase VopS" species:223926 "Vibrio parahaemolyticus RIMD 2210633" [GO:0006464 "cellular protein modification process" evidence=IDA] [GO:0009405 "pathogenesis" evidence=IDA] [GO:0018117 "protein adenylylation" evidence=IDA] [GO:0018178 "peptidyl-threonine adenylylation" evidence=IDA] [GO:0034260 "negative regulation of GTPase ac…	387	1	387	100	757.3	1e-217	387/387	100	387/387	100	0/387	0	1
gene1736	NC_004603.1	1800491	1800919	-	protein_coding	VP1687	.	1189194	.	NP_798066.1	type III chaperone	7.12544	4.50109	1.86519e-13	6.23737e-12	5.28563	2.65593	2.65593	5.28563	16	146	10.9474	100.021	429				No hit
gene1737	NC_004603.1	1801133	1801771	-	protein_coding	VP1688	.	1189195	.	NP_798067.1	type III secretion system protein	6.86788	3.94408	3.4955e-10	8.06814e-09	4.71428	2.21583	2.21583	4.71428	11	97	5.05289	44.6133	639	1	613	95.93	UNIPROTKB|Q9I312 - symbol:pscL "Type III export protein PscL" species:208964 "Pseudomonas aeruginosa PAO1" [GO:0030254 "protein secretion by the type III secretion system" evidence=IGC] Pfam:PF02108 PseudoCAP:PA1725 EMBL:AE004091 Proteomes:UP000002438 GO:GO:0030254 eggNOG:COG1317 InterPro:IPR018035 InterPro:IPR012842 TIGRFAMs:TIGR02499 KO:K03223 PIR:E83431 RefSeq:NP_250416.1 RefSeq:WP_003120328.1…	214	1	204	95.33	217.6	2e-55	107/204	52	148/204	72	0/204	0	1
gene1738	NC_004603.1	1801750	1802463	-	protein_coding	VP1689	.	1189196	.	NP_798068.1	hypothetical protein	4.56024	4.1339	3.36091e-08	5.9474e-07	4.82442	2.8002	2.8002	4.82442	18	105	7.39984	43.22	714	88	712	87.54	UNIPROTKB|Q01252 - symbol:yscK "Yop proteins translocation protein K" species:630 "Yersinia enterocolitica" [GO:0005515 "protein binding" evidence=IPI] InterPro:IPR009510 Pfam:PF06578 ProDom:PD023059 GO:GO:0009405 EMBL:M74011 PIR:B40049 RefSeq:WP_010891232.1 IntAct:Q01252 GeneID:31412278 Uniprot:Q01252	209	10	209	95.69	89.4	1e-16	66/212	31	98/212	46	16/212	7	1
gene1739	NC_004603.1	1802408	1803154	-	protein_coding	VP1690	.	1189197	.	NP_798069.1	type III secretion lipoprotein	10.8421	3.89673	7.70184e-13	2.40512e-11	4.72852	1.73112	1.73112	4.72852	7	98	2.75059	38.5567	747	4	730	97.32	UNIPROTKB|P69972 - symbol:yscJ "Yop proteins translocation lipoprotein J" species:632 "Yersinia pestis" [GO:0005515 "protein binding" evidence=IPI] InterPro:IPR003282 PRINTS:PR01338 GO:GO:0016021 GO:GO:0009405 GO:GO:0009279 PROSITE:PS51257 Proteomes:UP000000815 Proteomes:UP000001019 GO:GO:0009306 InterPro:IPR006182 Pfam:PF01514 EMBL:AF074612 EMBL:AF053946 EMBL:AL117189 EMBL:AE017043 PIR:T43566 Re…	244	1	242	99.18	289.7	5e-77	146/242	60	188/242	77	0/242	0	1
gene1740	NC_004603.1	1803154	1803498	-	protein_coding	VP1691	.	1189198	.	NP_798070.1	type III export protein	10.4757	2.25677	7.67958e-05	0.000709025	3.05117	0.73363	0.73363	3.05117	2	28	1.70161	23.8524	345	34	343	89.86	UNIPROTKB|Q9I315 - symbol:pscI "Type III export protein PscI" species:208964 "Pseudomonas aeruginosa PAO1" [GO:0030254 "protein secretion by the type III secretion system" evidence=IGC] InterPro:IPR012670 Pfam:PF17001 PseudoCAP:PA1722 EMBL:AE004091 Proteomes:UP000002438 GO:GO:0030254 TIGRFAMs:TIGR02497 PIR:B83431 RefSeq:NP_250413.1 RefSeq:WP_010895582.1 STRING:208964.PA1722 PaxDb:Q9I315 EnsemblBa…	112	13	112	89.29	88.6	8e-17	48/103	46	61/103	59	3/103	2	1
gene1741	NC_004603.1	1803507	1804133	-	protein_coding	VP1692	.	1189199	.	NP_798071.1	type III export protein	4.76798	4.39715	9.18111e-10	2.01385e-08	5.101	2.99269	2.99269	5.101	21	128	9.83105	59.9979	627	295	622	52.31	UNIPROTKB|Q9I316 - symbol:pscH "Type III export protein PscH" species:208964 "Pseudomonas aeruginosa PAO1" [GO:0030254 "protein secretion by the type III secretion system" evidence=IGC] InterPro:IPR013349 Pfam:PF09025 PseudoCAP:PA1721 GO:GO:0009405 EMBL:AE004091 Proteomes:UP000002438 GO:GO:0030254 GO:GO:0030257 PIR:A83431 RefSeq:NP_250412.1 RefSeq:WP_003100725.1 ProteinModelPortal:Q9I316 SMR:Q9I3…	143	31	141	77.62	55.1	2e-06	40/113	35	53/113	46	6/113	5	1
gene1742	NC_004603.1	1804130	1804489	-	protein_coding	VP1693	.	1189200	.	NP_798072.1	hypothetical protein	8.41167	3.58279	8.89818e-10	1.96826e-08	4.37741	1.73112	1.73112	4.37741	7	76	5.70747	62.0448	360	1	349	96.94	UNIPROTKB|P95435 - symbol:pscG "Type III export protein PscG" species:208964 "Pseudomonas aeruginosa PAO1" [GO:0030254 "protein secretion by the type III secretion system" evidence=IGC] InterPro:IPR013348 Pfam:PF09477 PseudoCAP:PA1720 GO:GO:0005737 GO:GO:0009405 EMBL:AE004091 Proteomes:UP000002438 GO:GO:0030254 EMBL:U56077 PDB:2UWJ PDBsum:2UWJ PIR:H83430 RefSeq:NP_250411.1 RefSeq:WP_003100735.1 P…	115	1	114	99.13	47.8	0.0002	42/119	35	56/119	47	8/119	6	1
gene1743	NC_004603.1	1804493	1804741	-	protein_coding	VP1694	.	1189201	.	NP_798073.1	type III export protein YscF	4.4595	4.03023	5.93988e-08	1.00907e-06	4.71428	2.72987	2.72987	4.71428	17	97	20.04	114.49	249	34	247	85.94	UNIPROTKB|P95434 - symbol:pscF "Type III export protein PscF" species:208964 "Pseudomonas aeruginosa PAO1" [GO:0030254 "protein secretion by the type III secretion system" evidence=IGC] InterPro:IPR011841 InterPro:IPR021123 InterPro:IPR037203 Pfam:PF09392 PseudoCAP:PA1719 GO:GO:0005576 GO:GO:0009405 EMBL:AE004091 Proteomes:UP000002438 GO:GO:0008565 GO:GO:0030254 GO:GO:0030257 EMBL:U56077 PDB:2UWJ…	85	13	85	85.88	92	5e-18	46/73	63	57/73	78	2/73	2	1
gene1744	NC_004603.1	1804949	1806250	-	protein_coding	VP1695	.	1189202	.	NP_798074.1	type III export protein PscD	14.278	6.22509	7.31761e-36	1.07165e-33	7.1159	3.40747	3.40747	7.1159	29	529	6.53786	119.409	1302	10	1300	99.16	UNIPROTKB|Q9I318 - symbol:pscD "Type III export protein PscD" species:208964 "Pseudomonas aeruginosa PAO1" [GO:0030254 "protein secretion by the type III secretion system" evidence=IGC] PseudoCAP:PA1717 GO:GO:0016021 EMBL:AE004091 Proteomes:UP000002438 GO:GO:0030254 InterPro:IPR032030 Pfam:PF16697 HOGENOM:HOG000219615 KO:K03220 InterPro:IPR012843 InterPro:IPR032034 Pfam:PF16693 TIGRFAMs:TIGR02500…	432	3	424	97.69	228.8	2e-58	146/435	33	241/435	55	18/435	4	1
gene1745	NC_004603.1	1806256	1808154	-	protein_coding	VP1696	.	1189203	.	NP_798075.1	type III secretion protein YscC	15.8996	6.8612	7.63705e-44	2.1623e-41	7.76542	3.86669	3.86669	7.76542	41	832	6.33734	128.763	1899	100	1879	93.73	UNIPROTKB|Q56974 - symbol:KIM5 "KIM5" species:632 "Yersinia pestis" [GO:0005515 "protein binding" evidence=IPI] InterPro:IPR003522 InterPro:IPR004845 InterPro:IPR004846 Pfam:PF00263 PRINTS:PR01337 PROSITE:PS00875 GO:GO:0008565 GO:GO:0009279 Proteomes:UP000000815 GO:GO:0009306 InterPro:IPR005644 Pfam:PF03958 EMBL:AF074612 EMBL:AF053946 EMBL:AL117189 EMBL:HQ612242 EMBL:M83225 PIR:T43573 RefSeq:NP_3…	607	26	599	94.56	520.8	4e-146	275/594	46	388/594	65	21/594	3	1
gene1746	NC_004603.1	1808142	1808570	-	protein_coding	VP1697	.	1189204	.	NP_798076.1	type III export apparatus protein NosA	6.60215	2.21986	0.000421961	0.00319442	2.95759	0.995829	0.995829	2.95759	3	26	2.05264	17.8119	429				No hit
gene1747	NC_004603.1	1808583	1809581	-	protein_coding	VP1698	.	1189205	.	NP_798077.1	hypothetical protein	8.1349	7.45386	1.41003e-33	1.71097e-31	8.28215	5.28954	5.28954	8.28215	115	1192	33.7894	350.675	999	181	946	76.68	UNIPROTKB|Q9I321 - symbol:exsD "ExsD" species:208964 "Pseudomonas aeruginosa PAO1" [GO:0005515 "protein binding" evidence=IPI] [GO:0032091 "negative regulation of protein binding" evidence=IDA] [GO:0043392 "negative regulation of DNA binding" evidence=IDA] [GO:0045892 "negative regulation of transcription, DNA-templated" evidence=IMP] [GO:0050709 "negative regulation of protein secretion" evidenc…	276	46	274	82.97	58.2	3e-07	60/261	22	108/261	41	38/261	14	1
gene1750	NC_004603.1	1811999	1812445	+	protein_coding	VP1701	.	1189208	.	NP_798080.1	exoenzyme S synthesis protein C	2.30183	3.3323	0.00878151	0.041439	3.80899	2.72987	2.72987	3.80899	17	50	11.1632	32.8743	447	1	385	86.13	UNIPROTKB|P26995 - symbol:exsC "Exoenzyme S synthesis protein C" species:208964 "Pseudomonas aeruginosa PAO1" [GO:0030254 "protein secretion by the type III secretion system" evidence=IMP] [GO:0045893 "positive regulation of transcription, DNA-templated" evidence=IMP] InterPro:IPR010261 Pfam:PF05932 PseudoCAP:PA1710 GO:GO:0016021 GO:GO:0005886 GO:GO:0005737 GO:GO:0045893 EMBL:AE004091 Proteomes:U…	145	1	129	88.97	76.6	4e-13	44/129	34	65/129	50	1/129	0	1
gene1751	NC_004603.1	1812453	1812764	+	protein_coding	VP1702	.	1189209	.	NP_798081.1	hypothetical protein	2.30754	3.48446	0.00564883	0.0283717	3.96141	2.86726	2.86726	3.96141	19	56	17.8751	52.7506	312				No hit
gene1754	NC_004603.1	1816496	1816690	+	protein_coding	VP1705	.	1189212	.	NP_798084.1	hypothetical protein	-2.11678	6.34156	8.9124e-06	0.000100135	5.72255	6.79046	6.79046	5.72255	331	199	498.244	299.925	195				No hit
gene1755	NC_004603.1	1817168	1817371	+	protein_coding	VP1706	.	1189213	.	NP_798085.1	hypothetical protein	4.91409	10.2201	3.72302e-26	2.87485e-24	10.9524	8.65819	8.65819	10.9524	1216	7608	1749.65	10960.6	204				No hit
gene1756	NC_004603.1	1817856	1818410	-	protein_coding	VP1707	.	1189214	.	NP_798086.1	hypothetical protein	-2.50333	5.43319	1.52419e-06	1.98566e-05	4.67071	5.96141	5.96141	4.67071	185	94	97.8424	49.777	555				No hit
gene1789	NC_004603.1	1855360	1855518	-	protein_coding	VP1740	.	1189247	.	NP_798119.1	hypothetical protein	-2.08085	6.00302	2.9705e-05	0.000301091	5.40566	6.4457	6.4457	5.40566	260	159	479.981	293.896	159				No hit
gene1809	NC_004603.1	1876206	1876751	-	protein_coding	VP1760	.	1189267	.	NP_798139.1	adenylate cyclase	2.42896	4.92585	2.80764e-05	0.000285264	5.42327	4.1885	4.1885	5.42327	52	161	27.955	86.6617	546	4	535	97.44	UNIPROTKB|O69199 - symbol:cyaB "Adenylate cyclase CyaB" species:644 "Aeromonas hydrophila" [GO:0004016 "adenylate cyclase activity" evidence=IDA] Pfam:PF01928 GO:GO:0005524 GO:GO:0005737 InterPro:IPR033469 InterPro:IPR023577 SMART:SM01118 SUPFAM:SSF55154 PROSITE:PS51707 GO:GO:0004016 EMBL:AJ223730 ProteinModelPortal:O69199 SMR:O69199 CDD:cd07890 InterPro:IPR008173 PANTHER:PTHR21028 TIGRFAMs:TIGR0…	191	1	177	92.67	199.1	7e-50	98/177	55	124/177	70	0/177	0	1
gene1810	NC_004603.1	1876839	1877294	-	protein_coding	VP1761	.	1189268	.	NP_798140.1	PRS2 protein	2.08781	4.88066	0.000472556	0.00352096	5.31423	4.28975	4.28975	5.31423	56	149	36.0472	96.0319	456	22	442	92.32	UNIPROTKB|Q4KK91 - symbol:PFL_0196 "Uncharacterized protein" species:220664 "Pseudomonas protegens Pf-5" [GO:0003674 "molecular_function" evidence=ND] [GO:0005575 "cellular_component" evidence=ND] [GO:0008150 "biological_process" evidence=ND] GO:GO:0016021 EMBL:CP000076 Proteomes:UP000008540 InterPro:IPR009305 Pfam:PF06127 HOGENOM:HOG000263779 OMA:HRDPRNI eggNOG:COG4539 eggNOG:ENOG4105NC1 RefSeq:…	174	1	140	80.46	74.7	2e-12	46/144	31	77/144	53	8/144	5	1
gene1813	NC_004603.1	1878387	1879274	+	protein_coding	VP1764	.	1189271	.	NP_798143.1	transmembrane protein	2.73624	6.41142	4.55633e-09	9.29195e-08	6.95873	5.52581	5.52581	6.95873	136	474	44.9546	156.877	888	1	862	97.07	UNIPROTKB|Q8E8X4 - symbol:SO_4527 "10 TMS drug/metabolite efflux pump (DME) family" species:211586 "Shewanella oneidensis MR-1" [GO:0003674 "molecular_function" evidence=ND] [GO:0008150 "biological_process" evidence=ND] InterPro:IPR000620 Pfam:PF00892 GO:GO:0016021 EMBL:AE014299 Proteomes:UP000008186 eggNOG:COG0697 HOGENOM:HOG000275237 KO:K15269 OMA:FWAMLFV OrthoDB:POG091H01US RefSeq:NP_720046.1 …	284	1	276	97.18	135.6	1e-30	88/293	30	152/293	51	23/293	7	1
gene1946	NC_004603.1	1981590	1981823	+	protein_coding	VP1897	.	1189404	.	NP_798276.1	hypothetical protein	-2.00472	6.19229	5.16842e-05	0.00049887	5.62699	6.61622	6.61622	5.62699	293	186	367.536	233.61	234	13	226	91.45	UNIPROTKB|Q8EJM4 - symbol:SO_0439 "Uncharacterized protein" species:211586 "Shewanella oneidensis MR-1" [GO:0003674 "molecular_function" evidence=ND] [GO:0005575 "cellular_component" evidence=ND] [GO:0008150 "biological_process" evidence=ND] EMBL:AE014299 Proteomes:UP000008186 RefSeq:NP_716076.2 RefSeq:WP_011070795.1 PaxDb:Q8EJM4 EnsemblBacteria:AAN53521 GeneID:1168315 KEGG:son:SO_0439 PATRIC:fig…	73	3	71	94.52	71.2	9e-12	32/71	45	44/71	61	2/71	2	1
gene1953	NC_004603.1	1987540	1989423	-	protein_coding	VP1904	.	1189411	.	NP_798283.1	methyl-accepting chemotaxis protein	-2.19301	7.89018	2.58515e-07	3.92111e-06	7.22285	8.35069	8.35069	7.22285	982	570	152.996	88.9176	1884	1	1696	90.02	UNIPROTKB|Q9KSG7 - symbol:VC_1289 "Methyl-accepting chemotaxis protein" species:243277 "Vibrio cholerae O1 biovar El Tor str. N16961" [GO:0004871 "signal transducer activity" evidence=ISS] [GO:0004872 "receptor activity" evidence=ISS] [GO:0006935 "chemotaxis" evidence=ISS] InterPro:IPR003660 InterPro:IPR004089 InterPro:IPR004090 Pfam:PF00015 Pfam:PF00672 PRINTS:PR00260 PROSITE:PS50111 PROSITE:PS5…	631	5	569	89.54	617.5	3e-175	414/565	73	458/565	81	0/565	0	1
gene1956	NC_004603.1	1992131	1992769	-	protein_coding	VP1907	.	1189414	.	NP_798286.1	LuxR family transcriptional regulator	2.14176	5.91133	2.15433e-05	0.000225912	6.35682	5.27726	5.27726	6.35682	114	311	52.3663	143.039	639	1	637	99.69	UNIPROTKB|Q9KSH9 - symbol:VC_1277 "Transcriptional regulator, LuxR family" species:243277 "Vibrio cholerae O1 biovar El Tor str. N16961" [GO:0003700 "DNA binding transcription factor activity" evidence=ISS] [GO:0006355 "regulation of transcription, DNA-templated" evidence=ISS] InterPro:IPR000792 InterPro:IPR001789 InterPro:IPR016032 Pfam:PF00072 Pfam:PF00196 PRINTS:PR00038 PROSITE:PS00622 PROSITE…	216	5	216	98.15	322.4	6e-87	173/212	81	195/212	91	0/212	0	1
gene1957	NC_004603.1	1992753	1994117	-	protein_coding	VP1908	.	1189415	.	NP_798287.1	sensor histidine kinase	2.91759	6.78991	1.39092e-10	3.39497e-09	7.36176	5.8331	5.8331	7.36176	169	628	36.3415	135.214	1365	1	1354	99.19	UNIPROTKB|Q9KSI0 - symbol:VC_1276 "Sensor histidine kinase" species:243277 "Vibrio cholerae O1 biovar El Tor str. N16961" [GO:0000155 "phosphorelay sensor kinase activity" evidence=ISS] [GO:0000160 "phosphorelay signal transduction system" evidence=ISS] InterPro:IPR011712 Pfam:PF07730 InterPro:IPR003594 Pfam:PF02518 InterPro:IPR005467 GO:GO:0016021 EMBL:AE003852 Proteomes:UP000000584 GO:GO:000562…	451	1	451	100	628.2	1e-178	331/451	73	389/451	86	0/451	0	1
gene1968	NC_004603.1	2004407	2005834	-	protein_coding	VP1919	.	1189426	.	NP_798298.1	hypothetical protein	-3.18783	5.15933	1.02403e-08	1.97684e-07	4.16355	5.78188	5.78188	4.16355	163	65	33.5048	13.3776	1428	61	1426	95.66	UNIPROTKB|Q9KSJ1 - symbol:VC_1265 "Uncharacterized protein" species:243277 "Vibrio cholerae O1 biovar El Tor str. N16961" [GO:0003674 "molecular_function" evidence=ND] [GO:0005575 "cellular_component" evidence=ND] [GO:0008150 "biological_process" evidence=ND] InterPro:IPR009056 InterPro:IPR036909 PROSITE:PS51007 GO:GO:0071281 GO:GO:0009055 GO:GO:0046872 EMBL:AE003852 Proteomes:UP000000584 GO:GO:0…	461	7	461	98.7	711.8	8e-204	332/455	72	388/455	85	0/455	0	1
gene1969	NC_004603.1	2005874	2007163	-	protein_coding	VP1920	.	1189427	.	NP_798299.1	iron-regulated protein A	-11.4471	7.7848	6.27514e-45	1.90361e-42	5.18599	8.66762	8.66762	5.18599	1224	136	278.509	30.9844	1290	28	1288	97.75	UNIPROTKB|Q9KSJ2 - symbol:VC_1264 "Iron-regulated protein A, putative" species:243277 "Vibrio cholerae O1 biovar El Tor str. N16961" [GO:0003674 "molecular_function" evidence=ND] [GO:0006879 "cellular iron ion homeostasis" evidence=ISS] GO:GO:0071281 EMBL:AE003852 Proteomes:UP000000584 GO:GO:0006879 GO:GO:0005623 InterPro:IPR018976 Pfam:PF09375 MEROPS:M75.001 eggNOG:ENOG41082PM eggNOG:COG3487 KO:…	435	16	435	96.55	653.7	2e-186	316/420	75	368/420	87	0/420	0	1
gene1975	NC_004603.1	2011340	2012311	-	protein_coding	VP1926	.	1189433	.	NP_798305.1	formate dependent nitrate reductase NrfD	5.48908	5.86029	4.77272e-18	2.15635e-16	6.60848	4.21449	4.21449	6.60848	53	371	16.0051	112.176	972	16	970	98.25	UNIPROTKB|Q8E8T8 - symbol:nrfD "Nitrite reductase quinol dehydrogenase component NrfD" species:211586 "Shewanella oneidensis MR-1" [GO:0006807 "nitrogen compound metabolic process" evidence=ISS] [GO:0050421 "nitrite reductase (NO-forming) activity" evidence=ISS] Pfam:PF03916 GO:GO:0016021 EMBL:AE014299 Proteomes:UP000008186 GO:GO:0006807 GO:GO:0050421 InterPro:IPR005614 eggNOG:ENOG4105DVI eggNOG:…	313	2	313	99.68	300.8	3e-80	154/318	48	212/318	66	6/318	1	1
gene1976	NC_004603.1	2012308	2012994	-	protein_coding	VP1927	.	1189434	.	NP_798306.1	nitrite reductase Fe-S protein NrfC	8.98414	5.84511	2.51965e-25	1.91088e-23	6.67981	3.61682	3.61682	6.67981	34	390	14.5268	166.841	687	7	676	97.53	UNIPROTKB|P45015 - symbol:nrfC "Protein NrfC homolog" species:71421 "Haemophilus influenzae Rd KW20" [GO:0005737 "cytoplasm" evidence=IBA] [GO:0016491 "oxidoreductase activity" evidence=IBA] InterPro:IPR017896 InterPro:IPR006311 Prosite:PS00198 GO:GO:0016491 GO:GO:0046872 EMBL:L42023 Proteomes:UP000000579 GO:GO:0051539 InterPro:IPR017900 PROSITE:PS51379 PROSITE:PS51318 Pfam:PF13247 eggNOG:COG0437…	225	4	222	97.33	312.8	5e-84	140/223	62	175/223	78	4/223	1	1
gene1977	NC_004603.1	2012996	2013574	-	protein_coding	VP1928	.	1189435	.	NP_798307.1	cytochrome c nitrite reductase pentaheme subunit	12.2676	6.67926	3.47118e-37	5.89685e-35	7.55787	4.02191	4.02191	7.55787	46	720	23.3199	365.467	579	40	427	67.01	UNIPROTKB|P0ABL1 - symbol:nrfB "formate-dependent nitrite reductase - penta-heme cytochrome c" species:83333 "Escherichia coli K-12" [GO:0030288 "outer membrane-bounded periplasmic space" evidence=IDA] [GO:0019645 "anaerobic electron transport chain" evidence=IDA] [GO:0020037 "heme binding" evidence=IDA] [GO:0042279 "nitrite reductase (cytochrome, ammonia-forming) activity" evidence=IMP] [GO:0009…	188	16	132	62.23	82.4	1e-14	43/129	33	61/129	47	12/129	9	1
gene1978	NC_004603.1	2014049	2015476	+	protein_coding	VP1929	.	1189436	nrfA	NP_798308.1	cytochrome c552	3.41637	5.53412	4.36041e-10	9.95626e-09	6.15554	4.42944	4.42944	6.15554	62	270	12.7442	55.5686	1428	106	1405	91.04	UNIPROTKB|Q8ZKF5 - symbol:nrfA "Cytochrome c-552" species:99287 "Salmonella enterica subsp. enterica serovar Typhimurium str. LT2" [GO:0019645 "anaerobic electron transport chain" evidence=IBA] [GO:0020037 "heme binding" evidence=IBA] [GO:0030288 "outer membrane-bounded periplasmic space" evidence=IBA] [GO:0042279 "nitrite reductase (cytochrome, ammonia-forming) activity" evidence=IBA] HAMAP:MF_0…	478	38	470	90.59	622.9	5e-177	279/433	64	340/433	78	0/433	0	1
gene1988	NC_004603.1	2027482	2027994	+	protein_coding	VP1939	.	1189446	.	NP_798318.1	hypothetical protein	3.01122	9.16304	1.39172e-13	4.69098e-12	9.7487	8.1616	8.1616	9.7487	861	3301	492.645	1891.13	513	1	511	99.61	UNIPROTKB|Q9KSK7 - symbol:VC_1249 "Uncharacterized protein" species:243277 "Vibrio cholerae O1 biovar El Tor str. N16961" [GO:0003674 "molecular_function" evidence=ND] [GO:0005575 "cellular_component" evidence=ND] [GO:0008150 "biological_process" evidence=ND] InterPro:IPR016867 PIRSF:PIRSF028103 InterPro:IPR002912 GO:GO:0006355 EMBL:AE003852 Proteomes:UP000000584 PROSITE:PS51671 eggNOG:COG2716 PI…	170	1	170	100	259.6	4e-68	124/170	72	150/170	88	0/170	0	1
gene2034	NC_004603.1	2074996	2077092	-	protein_coding	VP1981	.	1189492	.	NP_798360.1	methyl-accepting chemotaxis protein	2.22552	6.56059	1.75641e-06	2.26732e-05	7.02367	5.88256	5.88256	7.02367	175	496	24.4956	69.5148	2097	10	1954	92.75	UNIPROTKB|Q4K7R9 - symbol:PFL_4630 "Methyl-accepting chemotaxis protein" species:220664 "Pseudomonas protegens Pf-5" [GO:0004871 "signal transducer activity" evidence=ISM] [GO:0005737 "cytoplasm" evidence=ISM] [GO:0006935 "chemotaxis" evidence=ISM] [GO:0007165 "signal transduction" evidence=ISM] InterPro:IPR003660 InterPro:IPR004089 Pfam:PF00015 Pfam:PF00672 PROSITE:PS50111 PROSITE:PS50885 SMART:…	714	6	668	92.86	200.7	9e-50	230/666	34	348/666	52	21/666	3	1
gene2038	NC_004603.1	2079712	2080956	-	protein_coding	VP1985	.	1189496	.	NP_798364.1	hypothetical protein	2.00641	3.72373	0.0139437	0.0601329	4.14243	3.21494	3.21494	4.14243	25	64	5.89412	15.1079	1245	4	1228	98.39	UNIPROTKB|Q48AJ6 - symbol:CPS_0149 "Leucine-rich repeat protein" species:167879 "Colwellia psychrerythraea 34H" [GO:0003674 "molecular_function" evidence=ND] [GO:0008150 "biological_process" evidence=ND] InterPro:IPR001611 InterPro:IPR000719 InterPro:IPR017441 Pfam:PF00069 Pfam:PF13855 PROSITE:PS00107 PROSITE:PS50011 PROSITE:PS51450 SMART:SM00220 InterPro:IPR011009 InterPro:IPR003591 GO:GO:000552…	436	15	430	95.41	305.8	1e-81	267/416	64	310/416	74	8/416	1	1
gene2055	NC_004603.1	2096960	2097664	-	protein_coding	VP2002	.	1189513	.	NP_798381.1	hypothetical protein	-2.0164	5.39266	0.000234381	0.00189243	4.83762	5.82468	5.82468	4.83762	168	106	69.9469	44.1886	705	49	697	92.06	UNIPROTKB|Q81QM8 - symbol:GBAA_2396 "Methyltransferase" species:1392 "Bacillus anthracis" [GO:0003674 "molecular_function" evidence=ND] [GO:0005575 "cellular_component" evidence=ND] [GO:0008150 "biological_process" evidence=ND] InterPro:IPR029063 EMBL:AE017334 Proteomes:UP000000594 SUPFAM:SSF53335 eggNOG:ENOG4108I2M eggNOG:ENOG410ZTW6 RefSeq:WP_000871000.1 STRING:260799.BAS2232 EnsemblBacteria:AA…	262	14	242	87.4	104.4	3e-21	72/230	31	109/230	47	15/230	6	1
gene2057	NC_004603.1	2098715	2099248	+	protein_coding	VP2004	.	1189515	.	NP_798383.1	hypothetical protein	-7.60282	6.76553	1.34431e-29	1.18944e-27	4.71428	7.59408	7.59408	4.71428	580	97	318.812	53.3856	534				No hit
gene2077	NC_004603.1	2121568	2121807	+	protein_coding	VP2024	.	1189535	.	NP_798403.1	hypothetical protein	-2.52485	2.34159	0.0425388	0.142703	1.84927	2.93134	2.93134	1.84927	20	10	24.4606	12.2457	240				No hit
gene2082	NC_004603.1	2126683	2126964	-	protein_coding	VP2029	.	1189540	ihfB	NP_798408.1	integration host factor subunit beta	-2.38421	10.0216	2.5111e-09	5.3058e-08	9.26465	10.5168	10.5168	9.26465	4418	2359	4598.59	2458.51	282	1	277	98.23	UNIPROTKB|Q9KQT4 - symbol:ihfB "Integration host factor subunit beta" species:243277 "Vibrio cholerae O1 biovar El Tor str. N16961" [GO:0003677 "DNA binding" evidence=ISM;IBA] [GO:0005829 "cytosol" evidence=IBA] [GO:0006310 "DNA recombination" evidence=ISM] [GO:0006355 "regulation of transcription, DNA-templated" evidence=ISM] [GO:0006417 "regulation of translation" evidence=ISM] [GO:1903506 "reg…	92	1	92	100	182.6	3e-45	88/92	95	92/92	100	0/92	0	1
gene2083	NC_004603.1	2127169	2128839	-	protein_coding	VP2030	.	1189541	rpsA	NP_798409.1	30S ribosomal protein S1	-2.07304	14.5043	3.58112e-07	5.26264e-06	13.8847	14.9364	14.9364	13.8847	94610	58102	16619.2	10219	1671	1	1669	99.88	UNIPROTKB|Q9KQT3 - symbol:VC_1915 "30S ribosomal protein S1" species:243277 "Vibrio cholerae O1 biovar El Tor str. N16961" [GO:0003735 "structural constituent of ribosome" evidence=ISS] [GO:0006412 "translation" evidence=ISS] InterPro:IPR000110 InterPro:IPR003029 Pfam:PF00575 PIRSF:PIRSF002111 PROSITE:PS50126 GO:GO:0003723 GO:GO:0006412 EMBL:AE003852 Proteomes:UP000000584 GO:GO:0005840 GO:GO:0003…	556	1	556	100	1009.6	2e-293	513/556	92	534/556	96	0/556	0	1
gene2089	NC_004603.1	2134179	2137253	+	protein_coding	VP2036	.	1189547	.	NP_798415.1	DNA polymerase III alpha chain	2.74194	7.53209	1.58128e-10	3.81574e-09	8.08187	6.63559	6.63559	8.08187	297	1037	28.3504	99.1123	3075	4	3070	99.74	UNIPROTKB|Q4KAD4 - symbol:dnaE2 "Error-prone DNA polymerase" species:220664 "Pseudomonas protegens Pf-5" [GO:0003887 "DNA-directed DNA polymerase activity" evidence=ISM] [GO:0006260 "DNA replication" evidence=ISM] [GO:0009360 "DNA polymerase III complex" evidence=ISM] HAMAP:MF_01902 InterPro:IPR004013 InterPro:IPR004365 InterPro:IPR004805 InterPro:IPR011708 InterPro:IPR016195 InterPro:IPR023073 P…	1034	3	1033	99.71	936	6e-271	515/1039	49	673/1039	64	25/1039	2	1
gene2093	NC_004603.1	2141703	2142854	-	protein_coding	VP2040	.	1189551	.	NP_798419.1	hypothetical protein	2.90083	9.16567	8.1882e-13	2.53834e-11	9.73775	8.20437	8.20437	9.73775	887	3276	226.006	835.767	1152	4	1117	96.7	UNIPROTKB|Q9KQI9 - symbol:VC_2009 "Uncharacterized protein" species:243277 "Vibrio cholerae O1 biovar El Tor str. N16961" [GO:0003674 "molecular_function" evidence=ND] [GO:0005575 "cellular_component" evidence=ND] [GO:0008150 "biological_process" evidence=ND] [GO:0016787 "hydrolase activity" evidence=IBA] InterPro:IPR002641 InterPro:IPR016035 Pfam:PF01734 PROSITE:PS51635 GO:GO:0016787 GO:GO:00160…	389	5	376	95.63	432.2	1e-119	211/373	56	276/373	73	3/373	0	1
gene2137	NC_004603.1	2192020	2193294	-	protein_coding	VP2084	.	1189595	.	NP_798463.1	hypothetical protein	2.84828	7.08883	1.14819e-10	2.84555e-09	7.65237	6.15499	6.15499	7.65237	212	769	48.8061	177.26	1275				No hit
gene2154	NC_004603.1	2210057	2210206	-	protein_coding	VP2101	.	1189612	.	NP_798480.1	hypothetical protein	2.97483	2.23415	0.0191693	0.077609	2.80473	1.5794	1.5794	2.80473	6	23	11.7411	45.0641	150				No hit
gene2164	NC_004603.1	2218099	2218533	+	protein_coding	VP2110	.	1189622	.	NP_798489.1	hypothetical protein	-15.6726	5.87956	1.57853e-35	2.23467e-33	3.00514	6.80336	6.80336	3.00514	334	27	225.375	18.2418	435	4	433	98.85	UNIPROTKB|Q9KT94 - symbol:VC_1009 "Uncharacterized protein" species:243277 "Vibrio cholerae O1 biovar El Tor str. N16961" [GO:0003674 "molecular_function" evidence=ND] [GO:0005575 "cellular_component" evidence=ND] [GO:0008150 "biological_process" evidence=ND] InterPro:IPR011990 EMBL:AE003852 Proteomes:UP000000584 Gene3D:1.25.40.10 PIR:C82254 RefSeq:NP_230655.1 RefSeq:WP_001884549.1 STRING:243277.…	146	4	146	97.95	211.5	1e-53	95/143	66	120/143	83	0/143	0	1
gene2165	NC_004603.1	2218749	2219630	-	protein_coding	VP2111	.	1189623	.	NP_798490.1	sodium-type flagellar protein MotY	-3.31101	6.78453	7.35797e-13	2.31476e-11	5.70105	7.40955	7.40955	5.70105	510	196	169.727	65.3103	882	1	880	99.77	UNIPROTKB|Q9KT95 - symbol:VC_1008 "Sodium-type flagellar protein MotY" species:243277 "Vibrio cholerae O1 biovar El Tor str. N16961" [GO:0005198 "structural molecule activity" evidence=ISS] [GO:0009288 "bacterial-type flagellum" evidence=ISS] Pfam:PF00691 GO:GO:0016020 EMBL:AE003852 Proteomes:UP000000584 GO:GO:0005198 eggNOG:COG2885 CDD:cd07185 Gene3D:3.30.1330.60 InterPro:IPR006665 InterPro:IPR0…	294	1	294	100	471.5	1e-131	231/294	78	261/294	88	1/294	0	1
gene2173	NC_004603.1	2224169	2224672	+	protein_coding	VP2119	.	1189631	.	NP_798498.1	hypothetical protein	-7.18743	6.09601	8.46439e-25	6.09292e-23	4.14243	6.91851	6.91851	4.14243	362	64	210.827	37.3202	504	1	496	98.41	UNIPROTKB|Q9KQF2 - symbol:VC_2046 "Uncharacterized protein" species:243277 "Vibrio cholerae O1 biovar El Tor str. N16961" [GO:0003674 "molecular_function" evidence=ND] [GO:0005575 "cellular_component" evidence=ND] [GO:0008150 "biological_process" evidence=ND] EMBL:AE003852 Proteomes:UP000000584 PIR:B82124 RefSeq:NP_231680.1 RefSeq:WP_001881770.1 STRING:243277.VC2046 DNASU:2613427 EnsemblBacteria:…	178	12	176	92.7	189.9	4e-47	90/165	54	125/165	75	0/165	0	1
gene2174	NC_004603.1	2224867	2225550	+	protein_coding	VP2120	.	1189632	.	NP_798499.1	short chain dehydrogenase	3.25404	7.29899	3.02628e-13	9.88664e-12	7.90984	6.22058	6.22058	7.90984	222	920	95.2676	395.299	684	1	673	98.39	UNIPROTKB|Q9KQF1 - symbol:VC_2047 "Oxidoreductase, short-chain dehydrogenase/reductase family" species:243277 "Vibrio cholerae O1 biovar El Tor str. N16961" [GO:0016491 "oxidoreductase activity" evidence=ISS] Pfam:PF00106 InterPro:IPR002347 GO:GO:0016491 InterPro:IPR036291 SUPFAM:SSF51735 EMBL:AE003852 Proteomes:UP000000584 PRINTS:PR00081 PIR:C82124 RefSeq:NP_231681.1 RefSeq:WP_001881771.1 Protei…	226	4	225	98.23	206.5	5e-52	100/224	44	151/224	67	2/224	0	1
gene2175	NC_004603.1	2225700	2228402	-	protein_coding	VP2121	.	1189633	.	NP_798500.1	bifunctional acetaldehyde-CoA/alcohol dehydrogenase	2.01416	11.2695	1.14529e-06	1.51527e-05	11.6879	10.6782	10.6782	11.6879	4941	12670	536.558	1377.6	2703	1	2686	99.37	UNIPROTKB|Q9KQG5 - symbol:VC_2033 "Aldehyde-alcohol dehydrogenase" species:243277 "Vibrio cholerae O1 biovar El Tor str. N16961" [GO:0004025 "alcohol dehydrogenase activity, iron-dependent" evidence=ISS] [GO:0004028 "3-chloroallyl aldehyde dehydrogenase activity" evidence=ISS] [GO:0006113 "fermentation" evidence=ISS] InterPro:IPR001670 InterPro:IPR012079 InterPro:IPR015590 InterPro:IPR016161 Inte…	894	1	894	100	1684.5	0	849/895	94	874/895	97	1/895	0	1
gene2217	NC_004603.1	2275644	2276003	+	protein_coding	VP2162	.	1189675	.	NP_798541.1	hypothetical protein	-8.7416	7.88271	4.24328e-38	7.83531e-36	5.62699	8.72976	8.72976	5.62699	1278	186	1042.02	151.846	360	1	358	99.44	UNIPROTKB|Q9KQJ3 - symbol:VC_2005 "Uncharacterized protein" species:243277 "Vibrio cholerae O1 biovar El Tor str. N16961" [GO:0003674 "molecular_function" evidence=ND] [GO:0005575 "cellular_component" evidence=ND] [GO:0008150 "biological_process" evidence=ND] EMBL:AE003852 Proteomes:UP000000584 PIR:G82129 RefSeq:NP_231639.1 RefSeq:WP_001068121.1 STRING:243277.VC2005 DNASU:2613509 EnsemblBacteria:…	118	1	118	100	146.4	3e-34	73/119	61	96/119	80	1/119	0	1
gene2231	NC_004603.1	2286686	2287384	+	protein_coding	VP2176	.	1189689	.	NP_798555.1	aquaporin Z	2.22165	7.87461	1.95976e-07	3.03763e-06	8.33777	7.19138	7.19138	8.33777	438	1239	183.927	520.94	699	1	697	99.71	TIGR_CMR|CPS_4099 - symbol:CPS_4099 "aquaporin Z" species:167879 "Colwellia psychrerythraea 34H" [GO:0006833 "water transport" evidence=ISS] [GO:0015250 "water channel activity" evidence=ISS] HAMAP:MF_01146 InterPro:IPR000425 InterPro:IPR023743 Pfam:PF00230 PRINTS:PR00783 InterPro:IPR022357 GO:GO:0016021 GO:GO:0005886 EMBL:CP000083 Proteomes:UP000000547 Gene3D:1.20.1080.10 InterPro:IPR023271 SUPF…	232	1	231	99.57	371.3	1e-101	178/232	76	203/232	87	1/232	0	1
gene2271	NC_004603.1	2331439	2331924	-	protein_coding	VP2216	.	1189729	.	NP_798595.1	cytochrome c-type biogenesis protein	3.88214	2.69892	0.00059626	0.00429206	3.33787	1.73112	1.73112	3.33787	7	35	4.22776	21.1654	486	34	382	71.81	UNIPROTKB|P0ABM9 - symbol:ccmH "holocytochrome c synthetase - thiol:disulfide oxidoreductase CcmH" species:83333 "Escherichia coli K-12" [GO:0055114 "oxidation-reduction process" evidence=IEA] [GO:0015035 "protein disulfide oxidoreductase activity" evidence=ISM] [GO:0031237 "intrinsic component of periplasmic side of plasma membrane" evidence=ISS;IDA] [GO:0005515 "protein binding" evidence=IPI] […	350	10	125	33.14	136	6e-31	66/116	56	87/116	75	0/116	0	1
gene2284	NC_004603.1	2341550	2343784	-	protein_coding	VP2229	.	1189742	.	NP_798608.1	chemotaxis protein CheA	-3.06345	9.97472	2.82279e-14	9.99031e-13	8.95455	10.5678	10.5678	8.95455	4577	1902	601.107	250.108	2235	1	2233	99.91	UNIPROTKB|Q9KQD7 - symbol:VC_2063 "Chemotaxis protein CheA" species:243277 "Vibrio cholerae O1 biovar El Tor str. N16961" [GO:0004871 "signal transducer activity" evidence=ISS] [GO:0006935 "chemotaxis" evidence=ISS] [GO:0016301 "kinase activity" evidence=ISS] InterPro:IPR002545 InterPro:IPR004105 InterPro:IPR004358 InterPro:IPR008207 InterPro:IPR036061 InterPro:IPR036097 InterPro:IPR036641 InterP…	785	1	785	100	913.3	3e-264	578/787	73	620/787	78	45/787	5	1
gene2285	NC_004603.1	2343794	2344534	-	protein_coding	VP2230	.	1189743	.	NP_798609.1	chemotaxis protein CheZ	-2.24262	8.07473	1.03099e-07	1.6522e-06	7.38441	8.54498	8.54498	7.38441	1124	638	445.242	253.044	741	1	739	99.73	UNIPROTKB|Q9KQD6 - symbol:VC_2064 "Protein phosphatase CheZ" species:243277 "Vibrio cholerae O1 biovar El Tor str. N16961" [GO:0006935 "chemotaxis" evidence=ISS] InterPro:IPR007439 Pfam:PF04344 PIRSF:PIRSF002884 GO:GO:0005737 GO:GO:0004721 EMBL:AE003852 Proteomes:UP000000584 GO:GO:0006935 GO:GO:0050920 GO:GO:0097588 eggNOG:ENOG4108KCC eggNOG:COG3143 KO:K03414 GO:GO:0009288 OMA:GPQIHAD PIR:B82123 …	239	1	239	100	327	3e-88	170/246	69	195/246	79	7/246	2	1
gene2287	NC_004603.1	2345067	2345801	-	protein_coding	VP2232	.	1189745	fliA	NP_798611.1	flagellar biosynthesis sigma factor	-2.45427	8.00332	4.04653e-09	8.34254e-08	7.22285	8.51262	8.51262	7.22285	1099	570	438.893	227.919	735	1	733	99.73	UNIPROTKB|Q9KQD4 - symbol:fliA "RNA polymerase sigma factor FliA" species:243277 "Vibrio cholerae O1 biovar El Tor str. N16961" [GO:0006352 "DNA-templated transcription, initiation" evidence=ISS] [GO:0006355 "regulation of transcription, DNA-templated" evidence=IBA] [GO:0016987 "bacterial sigma factor activity" evidence=ISS] HAMAP:MF_00962 InterPro:IPR000943 InterPro:IPR007624 InterPro:IPR007627 …	244	1	244	100	410.6	2e-113	201/244	82	228/244	93	0/244	0	1
gene2288	NC_004603.1	2345794	2346681	-	protein_coding	VP2233	.	1189746	.	NP_798612.1	flagellar biosynthesis protein FlhG	-4.14597	9.64977	2.13444e-21	1.17727e-19	8.29057	10.3389	10.3389	8.29057	3905	1199	1290.79	396.826	888	1	886	99.77	UNIPROTKB|Q9KQD3 - symbol:VC_2067 "Site-determining protein" species:243277 "Vibrio cholerae O1 biovar El Tor str. N16961" [GO:0006276 "plasmid maintenance" evidence=ISS] InterPro:IPR027417 SUPFAM:SSF52540 GO:GO:0005524 EMBL:AE003852 Proteomes:UP000000584 GO:GO:0006276 InterPro:IPR033756 Pfam:PF10609 eggNOG:COG0455 InterPro:IPR025501 PIRSF:PIRSF003092 eggNOG:ENOG4107R21 KO:K04562 CDD:cd02038 Inte…	313	19	313	94.25	533.9	2e-150	271/295	91	286/295	96	0/295	0	1
gene2289	NC_004603.1	2346696	2348207	-	protein_coding	VP2234	.	1189747	flhF	NP_798613.2	flagellar biosynthesis regulator FlhF	-3.38402	9.21632	3.08542e-16	1.27221e-14	8.08879	9.84393	9.84393	8.08879	2770	1042	537.745	202.54	1512	1	1504	99.47	TIGR_CMR|VC_2068 - symbol:VC_2068 "flagellar biosynthetic protein FlhF, putative" species:686 "Vibrio cholerae O1 biovar El Tor" [GO:0001539 "cilium or flagellum-dependent cell motility" evidence=ISS] [GO:0009296 "obsolete flagellum assembly" evidence=ISS] InterPro:IPR000897 InterPro:IPR020006 Pfam:PF00448 SMART:SM00962 InterPro:IPR003593 InterPro:IPR027417 GO:GO:0005525 SUPFAM:SSF52540 EMBL:AE00…	495	1	493	99.6	689.9	3e-197	371/507	73	415/507	81	20/507	3	1
gene2297	NC_004603.1	2354525	2355571	-	protein_coding	VP2242	.	1189755	fliM	NP_798621.1	flagellar motor switch protein FliM	-2.12136	7.0707	2.28294e-06	2.88561e-05	6.44136	7.51787	7.51787	6.44136	550	330	154.193	92.632	1047	1	1036	98.95	UNIPROTKB|Q9KQ75 - symbol:VC_2126 "Flagellar motor switch protein FliM" species:243277 "Vibrio cholerae O1 biovar El Tor str. N16961" [GO:0009288 "bacterial-type flagellum" evidence=ISS] [GO:0050918 "positive chemotaxis" evidence=IBA] InterPro:IPR001689 Pfam:PF02154 PIRSF:PIRSF002888 PRINTS:PR00955 Pfam:PF01052 GO:GO:0005886 EMBL:AE003852 Proteomes:UP000000584 GO:GO:0050918 GO:GO:0003774 GO:GO:00…	349	1	345	98.85	605.9	5e-172	301/345	87	326/345	94	0/345	0	1
gene2299	NC_004603.1	2356132	2358063	-	protein_coding	VP2244	.	1189757	.	NP_798623.1	polar flagellar hook-length control protein FliK	-4.74623	8.16691	5.07858e-23	3.1259e-21	6.65766	8.89354	8.89354	6.65766	1432	384	217.563	58.4141	1932	1	1930	99.9	TIGR_CMR|VC_2128 - symbol:VC_2128 "flagellar hook-length control protein FliK, putative" species:686 "Vibrio cholerae O1 biovar El Tor" [GO:0001539 "cilium or flagellum-dependent cell motility" evidence=ISS] [GO:0009296 "obsolete flagellum assembly" evidence=ISS] InterPro:IPR001635 PRINTS:PR01007 Pfam:PF02120 EMBL:AE003852 Proteomes:UP000000584 GO:GO:0009424 GO:GO:0044780 KO:K02414 InterPro:IPR02…	674	6	674	99.26	167.9	6e-40	215/700	30	300/700	42	88/700	12	1
gene2309	NC_004603.1	2368533	2368943	-	protein_coding	VP2254	.	1189767	fliS	NP_798633.1	flagellar protein FliS	-6.81643	7.61859	9.90139e-31	9.77935e-29	5.67923	8.42491	8.42491	5.67923	1034	193	738.46	138.01	411	1	409	99.51	UNIPROTKB|Q9KQ65 - symbol:fliS "Flagellar protein FliS" species:243277 "Vibrio cholerae O1 biovar El Tor str. N16961" [GO:0005198 "structural molecule activity" evidence=ISS] InterPro:IPR003713 InterPro:IPR036584 Pfam:PF02561 PIRSF:PIRSF039090 GO:GO:0005829 EMBL:AE003852 Proteomes:UP000000584 GO:GO:0005198 GO:GO:0044780 eggNOG:ENOG4105MQ3 eggNOG:COG1516 KO:K02422 CDD:cd16098 PANTHER:PTHR34773 SUP…	136	1	136	100	240	3e-62	118/136	86	128/136	94	0/136	0	1
gene2310	NC_004603.1	2368956	2369261	-	protein_coding	VP2255	.	1189768	.	NP_798634.1	polar flagellar rod protein FlaI	-3.23079	3.5106	6.36389e-05	0.000597952	2.63374	4.16204	4.16204	2.63374	51	20	48.9212	19.2089	306	1	304	99.35	UNIPROTKB|Q9KQ64 - symbol:VC_2139 "Flagellar rod protein FlaI, putative" species:243277 "Vibrio cholerae O1 biovar El Tor str. N16961" [GO:0005198 "structural molecule activity" evidence=ISS] [GO:0009425 "bacterial-type flagellum basal body" evidence=ISS] EMBL:AE003852 Proteomes:UP000000584 GO:GO:0005198 GO:GO:0009425 PIR:F82111 RefSeq:NP_231770.1 RefSeq:WP_000248446.1 STRING:243277.VC2139 DNASU:…	104	4	104	97.12	88.6	7e-17	43/101	42	71/101	70	0/101	0	1
gene2311	NC_004603.1	2369265	2371277	-	protein_coding	VP2256	.	1189769	fliD	NP_798635.1	flagellar capping protein	-3.94334	10.0152	2.94556e-20	1.47174e-18	8.71283	10.6898	10.6898	8.71283	4981	1608	726.308	234.767	2013	1	2011	99.9	UNIPROTKB|Q9KQ63 - symbol:fliD "Flagellar hook-associated protein 2" species:243277 "Vibrio cholerae O1 biovar El Tor str. N16961" [GO:0005198 "structural molecule activity" evidence=ISS] [GO:0009421 "bacterial-type flagellum filament cap" evidence=IBA] [GO:0009424 "bacterial-type flagellum hook" evidence=ISS] [GO:0071973 "bacterial-type flagellum-dependent cell motility" evidence=IBA] InterPro:I…	666	1	665	99.85	702.6	7e-201	410/672	61	484/672	72	9/672	1	1
gene2312	NC_004603.1	2371298	2371732	-	protein_coding	VP2257	.	1189770	.	NP_798636.1	flagellar protein FlaG	-4.21948	10.0682	4.98692e-22	2.82393e-20	8.68755	10.762	10.762	8.68755	5237	1580	3533.8	1067.49	435	1	433	99.54	TIGR_CMR|VC_2141 - symbol:VC_2141 "flagellin FlaG" species:686 "Vibrio cholerae O1 biovar El Tor" [GO:0001539 "cilium or flagellum-dependent cell motility" evidence=ISS] [GO:0005198 "structural molecule activity" evidence=ISS] [GO:0009420 "bacterial-type flagellum filament" evidence=ISS] Pfam:PF03646 EMBL:CP000627 EMBL:CP001235 Proteomes:UP000000249 EMBL:AF007122 RefSeq:WP_000405330.1 ProteinMode…	153	1	153	100	139.4	5e-32	81/154	52	101/154	65	11/154	7	1
gene2313	NC_004603.1	2371813	2372943	-	protein_coding	VP2258	.	1189771	.	NP_798637.1	flagellin	-3.46844	10.6309	2.97382e-17	1.30204e-15	9.47294	11.2658	11.2658	9.47294	7427	2726	1927.52	708.365	1131	1	1129	99.82	TIGR_CMR|VC_2142 - symbol:VC_2142 "flagellin FlaB" species:686 "Vibrio cholerae O1 biovar El Tor" [GO:0001539 "cilium or flagellum-dependent cell motility" evidence=ISS] [GO:0005198 "structural molecule activity" evidence=ISS] [GO:0009420 "bacterial-type flagellum filament" evidence=ISS] InterPro:IPR001029 InterPro:IPR001492 InterPro:IPR010810 Pfam:PF00669 Pfam:PF00700 Pfam:PF07196 PRINTS:PR00207…	376	1	376	100	610.5	2e-173	311/376	82	349/376	92	0/376	0	1
gene2314	NC_004603.1	2373231	2374367	-	protein_coding	VP2259	.	1189772	.	NP_798638.1	flagellin	-9.38891	8.65992	7.96871e-43	1.99077e-40	6.30076	9.51587	9.51587	6.30076	2206	299	569.499	77.2867	1137	1	1135	99.82	TIGR_CMR|VC_2143 - symbol:VC_2143 "flagellin FlaD" species:686 "Vibrio cholerae O1 biovar El Tor" [GO:0001539 "cilium or flagellum-dependent cell motility" evidence=ISS] [GO:0005198 "structural molecule activity" evidence=ISS] [GO:0009420 "bacterial-type flagellum filament" evidence=ISS] InterPro:IPR001029 InterPro:IPR001492 InterPro:IPR010810 Pfam:PF00669 Pfam:PF00700 Pfam:PF07196 PRINTS:PR00207…	377	1	377	100	610.1	3e-173	318/378	84	342/378	90	1/378	0	1
gene2315	NC_004603.1	2374358	2374630	-	protein_coding	VP2260	.	1189773	.	NP_798639.1	hypothetical protein	-21.3408	1.86281	2.59951e-05	0.000266027	0.333786	2.86726	2.86726	0.333786	19	1	20.4286	1.07654	273				No hit
gene2316	NC_004603.1	2374631	2375764	-	protein_coding	VP2261	.	1189774	.	NP_798640.1	flagellin	-11.2655	8.36219	3.39369e-47	1.31027e-44	5.7715	9.24196	9.24196	5.7715	1824	206	472.128	53.3885	1134	1	1129	99.56	TIGR_CMR|VC_2144 - symbol:VC_2144 "flagellin FlaE" species:686 "Vibrio cholerae O1 biovar El Tor" [GO:0001539 "cilium or flagellum-dependent cell motility" evidence=ISS] [GO:0005198 "structural molecule activity" evidence=ISS] [GO:0009420 "bacterial-type flagellum filament" evidence=ISS] InterPro:IPR001029 InterPro:IPR001492 InterPro:IPR010810 Pfam:PF00669 Pfam:PF00700 Pfam:PF07196 PRINTS:PR00207…	378	1	376	99.47	553.1	4e-156	278/376	73	329/376	87	0/376	0	1
gene2320	NC_004603.1	2377852	2378184	+	protein_coding	VP2265	.	1189778	.	NP_798644.1	hypothetical protein	2.27233	2.74479	0.0335099	0.119093	3.2219	2.21583	2.21583	3.2219	11	32	9.69609	28.2423	333	34	274	72.37	UNIPROTKB|Q60CC0 - symbol:MCA0188 "Uncharacterized protein" species:243233 "Methylococcus capsulatus str. Bath" [GO:0003674 "molecular_function" evidence=ND] [GO:0005575 "cellular_component" evidence=ND] [GO:0008150 "biological_process" evidence=ND] EMBL:AE017282 Proteomes:UP000006821 eggNOG:ENOG4108ZVF eggNOG:ENOG4111NYT HOGENOM:HOG000286601 InterPro:IPR025294 Pfam:PF13698 STRING:243233.MCA0188 …	151	40	114	49.67	50.8	2e-05	28/80	35	48/80	60	5/80	6	1
gene2326	NC_004603.1	2381039	2381242	+	protein_coding	VP2271	.	1189784	.	NP_798650.1	hypothetical protein	2.62196	5.8408	1.58132e-07	2.48736e-06	6.3705	5.00686	5.00686	6.3705	94	314	135.253	452.37	204	4	91	43.14	UNIPROTKB|Q9KQ50 - symbol:VC_2154 "Uncharacterized protein" species:243277 "Vibrio cholerae O1 biovar El Tor str. N16961" [GO:0003674 "molecular_function" evidence=ND] [GO:0005575 "cellular_component" evidence=ND] [GO:0008150 "biological_process" evidence=ND] GO:GO:0016021 EMBL:AE003852 Proteomes:UP000000584 PIR:E82113 RefSeq:NP_231785.1 RefSeq:WP_001881847.1 STRING:243277.VC2154 DNASU:2613290 En…	74	5	33	39.19	46.2	0.0003	20/29	68	26/29	89	0/29	0	1
gene2335	NC_004603.1	2388473	2389045	+	protein_coding	VP2280	.	1189793	.	NP_798659.1	Trp repressor-binding protein	2.21167	7.42371	4.25138e-07	6.16233e-06	7.88464	6.74661	6.74661	7.88464	321	904	164.437	463.669	573	13	562	95.99	UNIPROTKB|Q9KQ38 - symbol:VC_2166 "Trp repressor-binding protein" species:243277 "Vibrio cholerae O1 biovar El Tor str. N16961" [GO:0006568 "tryptophan metabolic process" evidence=ISS] InterPro:IPR001226 InterPro:IPR005025 InterPro:IPR008254 Pfam:PF03358 PROSITE:PS00201 PROSITE:PS50902 InterPro:IPR029039 GO:GO:0016491 GO:GO:0009055 GO:GO:0055114 EMBL:AE003852 Proteomes:UP000000584 GO:GO:0006568 G…	186	4	185	97.85	278.1	1e-73	134/183	73	158/183	86	1/183	0	1
gene2336	NC_004603.1	2389098	2389541	+	protein_coding	VP2281	.	1189794	.	NP_798660.1	hypothetical protein	2.22376	6.33	3.07911e-06	3.77948e-05	6.79251	5.65478	5.65478	6.79251	149	422	98.5035	279.334	444	52	439	87.39	UNIPROTKB|Q9KQ37 - symbol:VC_2167 "Uncharacterized protein" species:243277 "Vibrio cholerae O1 biovar El Tor str. N16961" [GO:0003674 "molecular_function" evidence=ND] [GO:0005575 "cellular_component" evidence=ND] [GO:0008150 "biological_process" evidence=ND] GO:GO:0016021 EMBL:AE003852 Proteomes:UP000000584 PIR:H82110 RefSeq:NP_231798.1 RefSeq:WP_000213731.1 STRING:243277.VC2167 DNASU:2613303 En…	145	15	143	88.97	205.7	6e-52	98/129	75	109/129	84	0/129	0	1
gene2381	NC_004603.1	2438015	2438521	-	protein_coding	VP2326	.	1189839	.	NP_798705.1	acetyltransferase-like protein	-2.6086	8.34157	2.22223e-10	5.27252e-09	7.4968	8.87533	8.87533	7.4968	1414	690	818.634	399.977	507	1	478	94.28	UNIPROTKB|Q9KTL8 - symbol:VC_0884 "Acetyltransferase-related protein" species:243277 "Vibrio cholerae O1 biovar El Tor str. N16961" [GO:0006474 "N-terminal protein amino acid acetylation" evidence=IBA] [GO:0008080 "N-acetyltransferase activity" evidence=IBA] [GO:0008150 "biological_process" evidence=ND] InterPro:IPR000182 Pfam:PF13302 EMBL:AE003852 Proteomes:UP000000584 GO:GO:0008080 InterPro:IPR…	207	31	190	77.29	176.4	4e-43	80/160	50	117/160	73	1/160	0	1
gene2386	NC_004603.1	2442470	2442730	-	protein_coding	VP2331	.	1189844	rpmE2	NP_798710.1	50S ribosomal protein L31 type B	-2.48183	3.43885	0.0023906	0.0137947	2.80473	3.99217	3.99217	2.80473	45	23	50.6081	25.8989	261	1	259	99.23	UNIPROTKB|Q9KTM4 - symbol:rpmE2 "50S ribosomal protein L31 type B" species:243277 "Vibrio cholerae O1 biovar El Tor str. N16961" [GO:0003735 "structural constituent of ribosome" evidence=ISS] [GO:0006412 "translation" evidence=ISS] HAMAP:MF_00502 InterPro:IPR002150 InterPro:IPR027493 Pfam:PF01197 PRINTS:PR01249 PROSITE:PS01143 GO:GO:0006412 EMBL:AE003852 Proteomes:UP000000584 GO:GO:0005840 GO:GO:…	85	1	85	100	146.7	2e-34	68/86	79	75/86	87	1/86	1	1
gene2390	NC_004603.1	2446319	2446525	+	protein_coding	VP2335	.	1189848	.	NP_798714.1	hypothetical protein	-2.2324	7.06303	4.75741e-07	6.75743e-06	6.38406	7.53343	7.53343	6.38406	556	317	788.411	450.073	207	1	202	97.58	UNIPROTKB|Q9KTN0 - symbol:VC_0872 "UPF0253 protein VC_0872" species:243277 "Vibrio cholerae O1 biovar El Tor str. N16961" [GO:0003674 "molecular_function" evidence=ND] [GO:0005575 "cellular_component" evidence=ND] [GO:0008150 "biological_process" evidence=ND] EMBL:AE003852 Proteomes:UP000000584 PIR:E82268 RefSeq:NP_230519.1 RefSeq:WP_000870111.1 SMR:Q9KTN0 STRING:243277.VC0872 DNASU:2614539 Ensem…	67	1	67	100	115.9	3e-25	56/67	83	61/67	91	0/67	0	1
gene2398	NC_004603.1	2455718	2455951	-	protein_coding	VP2343	.	1189856	.	NP_798722.1	hypothetical protein	-2.7077	5.61662	8.9385e-08	1.45448e-06	4.77041	6.17498	6.17498	4.77041	215	101	269.694	126.853	234	1	229	97.86	UNIPROTKB|Q4KKD4 - symbol:PFL_0152 "Uncharacterized protein" species:220664 "Pseudomonas protegens Pf-5" [GO:0003674 "molecular_function" evidence=ND] [GO:0005575 "cellular_component" evidence=ND] [GO:0008150 "biological_process" evidence=ND] EMBL:CP000076 Proteomes:UP000008540 eggNOG:ENOG4105YZV eggNOG:ENOG41125G0 HOGENOM:HOG000273777 OrthoDB:POG091H03WA InterPro:IPR021250 Pfam:PF10982 RefSeq:WP…	81	1	76	93.83	73.6	2e-12	36/76	47	47/76	61	0/76	0	1
gene2399	NC_004603.1	2456128	2456361	-	protein_coding	VP2344	.	1189857	.	NP_798723.1	hypothetical protein	-2.10749	4.8434	0.000342162	0.00266636	4.2647	5.30171	5.30171	4.2647	116	70	145.509	87.9177	234	1	232	99.15	UNIPROTKB|Q9KPS4 - symbol:VC_2288 "Uncharacterized protein" species:243277 "Vibrio cholerae O1 biovar El Tor str. N16961" [GO:0003674 "molecular_function" evidence=ND] [GO:0005575 "cellular_component" evidence=ND] [GO:0008150 "biological_process" evidence=ND] EMBL:AE003852 Proteomes:UP000000584 KO:K05952 InterPro:IPR007495 PANTHER:PTHR40691 Pfam:PF04400 eggNOG:COG2991 PIR:H82093 RefSeq:NP_231919.…	77	1	77	100	144.4	8e-34	68/77	88	74/77	96	0/77	0	1
gene2440	NC_004603.1	2500433	2501287	+	protein_coding	VP2385	.	1189898	.	NP_798764.1	glycerol uptake facilitator protein GlpF	4.34208	5.07745	2.10031e-11	5.68153e-10	5.7646	3.72924	3.72924	5.7646	37	205	12.7023	70.4663	855	22	784	89.24	UNIPROTKB|P44826 - symbol:glpF "Glycerol uptake facilitator protein" species:71421 "Haemophilus influenzae Rd KW20" [GO:0005887 "integral component of plasma membrane" evidence=IBA] [GO:0009992 "cellular water homeostasis" evidence=IBA] [GO:0015250 "water channel activity" evidence=IBA] [GO:0015254 "glycerol channel activity" evidence=IBA] [GO:0034220 "ion transmembrane transport" evidence=IBA] I…	264	4	258	96.59	364.8	1e-99	177/255	69	208/255	81	1/255	0	1
gene2443	NC_004603.1	2503985	2505544	+	protein_coding	VP2388	.	1189901	glpD	NP_798767.1	glycerol-3-phosphate dehydrogenase	2.81346	7.46444	7.01841e-11	1.79561e-09	8.02389	6.5412	6.5412	8.02389	278	996	52.308	187.641	1560	43	1522	94.87	UNIPROTKB|Q9KLT4 - symbol:VC_A0657 "Glycerol-3-phosphate dehydrogenase" species:243277 "Vibrio cholerae O1 biovar El Tor str. N16961" [GO:0004368 "glycerol-3-phosphate dehydrogenase activity" evidence=ISS] [GO:0006071 "glycerol metabolic process" evidence=ISS] InterPro:IPR000447 InterPro:IPR006076 Pfam:PF01266 PRINTS:PR01001 PROSITE:PS00977 Gene3D:3.50.50.60 InterPro:IPR036188 SUPFAM:SSF51905 Pro…	512	13	501	95.51	659.1	7e-188	327/494	66	390/494	78	6/494	1	1
gene2462	NC_004603.1	2526622	2527761	+	protein_coding	VP2407	.	1189920	.	NP_798786.1	chromate resistance protein-like protein	-3.16381	3.18244	0.000577021	0.00416062	2.36879	3.83353	3.83353	2.36879	40	16	10.2992	4.12486	1140	1	1138	99.82	UNIPROTKB|Q9KPM8 - symbol:VC_2339 "Chromate resistance protein-related protein" species:243277 "Vibrio cholerae O1 biovar El Tor str. N16961" [GO:0005215 "transporter activity" evidence=ISS] [GO:0006810 "transport" evidence=ISS] InterPro:IPR003370 Pfam:PF02417 GO:GO:0016021 EMBL:AE003852 Proteomes:UP000000584 GO:GO:0006810 GO:GO:0005215 GO:GO:0015109 InterPro:IPR014047 PANTHER:PTHR33567 eggNOG:CO…	380	1	380	100	496.9	3e-139	252/380	66	302/380	79	1/380	0	1
gene2463	NC_004603.1	2527875	2528987	+	protein_coding	VP2408	.	1189921	.	NP_798787.1	hypothetical protein	-2.48695	3.55594	0.00206394	0.0121156	2.90841	4.10761	4.10761	2.90841	49	25	12.9226	6.60144	1113				No hit
gene2464	NC_004603.1	2529135	2530151	-	protein_coding	VP2409	.	1189922	.	NP_798788.1	hypothetical protein	-2.095	7.02323	3.67058e-06	4.46675e-05	6.40637	7.46472	7.46472	6.40637	530	322	152.969	93.0527	1017				No hit
gene2467	NC_004603.1	2532094	2533545	-	protein_coding	VP2412	.	1189925	.	NP_798791.1	pilus assembly protein	-2.03711	8.18052	2.33171e-06	2.93851e-05	7.58355	8.60638	8.60638	7.58355	1173	733	237.126	148.365	1452	85	1435	93.04	UNIPROTKB|Q5LNW3 - symbol:SPO3090 "Type II/IV secretion system protein, TadA subfamily" species:246200 "Ruegeria pomeroyi DSS-3" [GO:0009297 "pilus assembly" evidence=ISS] [GO:0016887 "ATPase activity" evidence=ISS] InterPro:IPR001482 Pfam:PF00437 InterPro:IPR027417 SUPFAM:SSF52540 GO:GO:0005524 EMBL:CP000031 Proteomes:UP000001023 GO:GO:0016887 GO:GO:0006810 GO:GO:0009297 RefSeq:WP_011048783.1 Pr…	479	26	474	93.74	455.7	1e-126	232/450	51	318/450	70	1/450	0	1
gene2468	NC_004603.1	2533558	2534766	-	protein_coding	VP2413	.	1189926	.	NP_798792.1	pilus assembly protein	-2.48528	5.31523	2.98483e-06	3.67436e-05	4.56362	5.84146	5.84146	4.56362	170	87	41.2735	21.1489	1209	286	1174	73.53	UNIPROTKB|Q4KIU5 - symbol:PFL_0696 "Uncharacterized protein" species:220664 "Pseudomonas protegens Pf-5" [GO:0003674 "molecular_function" evidence=ND] [GO:0005575 "cellular_component" evidence=ND] [GO:0008150 "biological_process" evidence=ND] InterPro:IPR027417 SUPFAM:SSF52540 EMBL:CP000076 Proteomes:UP000008540 eggNOG:COG4963 KO:K02282 RefSeq:WP_011059065.1 ProteinModelPortal:Q4KIU5 STRING:22066…	395	81	378	75.44	80.5	8e-14	67/300	22	123/300	41	6/300	2	1
gene2473	NC_004603.1	2537056	2537280	-	protein_coding	VP2418	.	1189931	.	NP_798797.1	hypothetical protein	-2.34255	7.15141	8.33706e-08	1.36709e-06	6.42397	7.64274	7.64274	6.42397	600	326	782.739	425.823	225				No hit
gene2478	NC_004603.1	2541397	2541570	-	protein_coding	VP2423	.	1189936	.	NP_798802.1	fimbrial protein	-2.39273	5.89525	1.01213e-06	1.36895e-05	5.16521	6.40114	6.40114	5.16521	252	134	425.108	226.334	174				No hit
gene2479	NC_004603.1	2541870	2542625	+	protein_coding	VP2424	.	1189937	.	NP_798803.1	hypothetical protein	-2.39895	6.94623	6.19802e-08	1.04456e-06	6.19708	7.44839	7.44839	6.19708	524	278	203.45	108.073	756	448	754	40.61	UNIPROTKB|Q7CG42 - symbol:araC7 "Putative AraC-type regulatory protein" species:632 "Yersinia pestis" [GO:0000987 "proximal promoter sequence-specific DNA binding" evidence=IBA] [GO:0003700 "DNA binding transcription factor activity" evidence=IBA] [GO:0005829 "cytosol" evidence=IBA] [GO:0006355 "regulation of transcription, DNA-templated" evidence=IBA] [GO:0019172 "glyoxalase III activity" eviden…	291	181	281	34.71	73.9	4e-12	38/102	37	58/102	56	1/102	0	1
gene2485	NC_004603.1	2549778	2552126	+	protein_coding	VP2430	.	1189943	.	NP_798809.1	hypothetical protein	-2.38693	6.91504	7.47231e-08	1.23964e-06	6.17126	7.41516	7.41516	6.17126	512	273	63.9787	34.1565	2349	1	2344	99.79	UNIPROTKB|Q9KPM3 - symbol:VC_2344 "Uncharacterized protein" species:243277 "Vibrio cholerae O1 biovar El Tor str. N16961" [GO:0003674 "molecular_function" evidence=ND] [GO:0005575 "cellular_component" evidence=ND] [GO:0008150 "biological_process" evidence=ND] InterPro:IPR009875 Pfam:PF07238 EMBL:AE003852 Proteomes:UP000000584 GO:GO:0035438 PIR:A82089 RefSeq:NP_231974.1 RefSeq:WP_001187860.1 Prote…	779	1	779	100	971.5	9e-282	464/783	59	615/783	78	6/783	0	1
gene2493	NC_004603.1	2560355	2561128	-	protein_coding	VP2439	.	1189951	.	NP_798817.1	hydrolase	-2.17771	4.93449	0.000165676	0.00140725	4.32215	5.40688	5.40688	4.32215	125	73	47.4043	27.7189	774	10	772	98.58	UNIPROTKB|Q9KPL4 - symbol:VC_2353 "Uncharacterized protein" species:243277 "Vibrio cholerae O1 biovar El Tor str. N16961" [GO:0003674 "molecular_function" evidence=ND] [GO:0004536 "deoxyribonuclease activity" evidence=IBA] [GO:0005575 "cellular_component" evidence=ND] [GO:0006308 "DNA catabolic process" evidence=IBA] [GO:0008150 "biological_process" evidence=ND] InterPro:IPR001130 InterPro:IPR018…	283	23	277	90.11	277.7	2e-73	134/255	52	178/255	69	1/255	0	1
gene2504	NC_004603.1	2570131	2571477	-	protein_coding	VP2449	.	1189962	vmrA	NP_798828.1	multidrug efflux pump VmrA	2.3082	8.92	1.67419e-08	3.09142e-07	9.40033	8.19625	8.19625	9.40033	882	2592	192.198	565.537	1347	1	1306	96.96	UNIPROTKB|Q9KU73 - symbol:VC_0650 "Uncharacterized protein" species:243277 "Vibrio cholerae O1 biovar El Tor str. N16961" [GO:0003674 "molecular_function" evidence=ND] [GO:0005575 "cellular_component" evidence=ND] [GO:0006855 "drug transmembrane transport" evidence=IBA] [GO:0008150 "biological_process" evidence=ND] [GO:0015238 "drug transmembrane transporter activity" evidence=IBA] InterPro:IPR00…	445	2	436	97.75	638.6	8e-182	305/435	70	373/435	85	0/435	0	1
gene2547	NC_004603.1	2625266	2626891	-	protein_coding	VP2490	.	1190005	.	NP_798869.1	iron(III) ABC transporter permease	-4.37785	6.19041	2.63064e-16	1.09533e-14	4.81111	6.90261	6.90261	4.81111	358	104	64.6265	18.7978	1626	1	1624	99.88	UNIPROTKB|Q9KUB4 - symbol:VC_0609 "Iron(III) ABC transporter, permease protein" species:243277 "Vibrio cholerae O1 biovar El Tor str. N16961" [GO:0005381 "iron ion transmembrane transporter activity" evidence=ISS] [GO:0005886 "plasma membrane" evidence=IBA] [GO:0006826 "iron ion transport" evidence=ISS] [GO:0042626 "ATPase activity, coupled to transmembrane movement of substances" evidence=ISS] I…	541	1	541	100	833.9	2e-240	413/541	76	473/541	87	0/541	0	1
gene2548	NC_004603.1	2626991	2628004	-	protein_coding	VP2491	.	1190006	.	NP_798870.1	iron(III) ABC transporter periplasmic iron-compound-binding protein	-12.4134	9.71715	2.4013e-54	1.69972e-51	6.98268	10.6064	10.6064	6.98268	4701	482	1360.82	139.702	1014	1	1012	99.8	UNIPROTKB|Q9KUB5 - symbol:VC_0608 "Iron(III) ABC transporter, periplasmic iron-compound-binding protein" species:243277 "Vibrio cholerae O1 biovar El Tor str. N16961" [GO:0005381 "iron ion transmembrane transporter activity" evidence=ISS] [GO:0006826 "iron ion transport" evidence=ISS] [GO:0042626 "ATPase activity, coupled to transmembrane movement of substances" evidence=ISS] GO:GO:0071281 GO:GO:…	352	16	352	95.74	556.2	4e-157	269/337	79	308/337	91	0/337	0	1
gene2556	NC_004603.1	2640574	2641290	+	protein_coding	VP2499	.	1190014	.	NP_798878.1	sugar fermentation stimulation protein A	2.20208	7.00228	1.04686e-06	1.40697e-05	7.46101	6.3316	6.3316	7.46101	240	673	98.2518	275.861	717	1	709	98.88	UNIPROTKB|Q9KUC5 - symbol:sfsA "Sugar fermentation stimulation protein homolog" species:243277 "Vibrio cholerae O1 biovar El Tor str. N16961" [GO:0003677 "DNA binding" evidence=ISS] [GO:0005975 "carbohydrate metabolic process" evidence=ISS] Pfam:PF03749 GO:GO:0005975 GO:GO:0003677 EMBL:AE003852 Proteomes:UP000000584 eggNOG:ENOG4105PW4 eggNOG:COG1489 KO:K06206 OMA:AHCPNTG HAMAP:MF_00095 InterPro:I…	244	1	237	97.13	337	3e-91	166/237	70	193/237	81	1/237	0	1
gene2595	NC_004603.1	2676227	2676838	-	protein_coding	VP2538	.	1190053	.	NP_798917.1	hypothetical protein	2.39273	6.58333	2.17373e-07	3.34487e-06	7.07749	5.8331	5.8331	7.07749	169	515	81.0557	247.315	612	16	604	96.24	UNIPROTKB|Q47WU0 - symbol:CPS_4077 "Putative lipoprotein" species:167879 "Colwellia psychrerythraea 34H" [GO:0003674 "molecular_function" evidence=ND] [GO:0008150 "biological_process" evidence=ND] EMBL:CP000083 Proteomes:UP000000547 InterPro:IPR023346 SUPFAM:SSF53955 CAZy:GH23 eggNOG:ENOG4108UVB eggNOG:COG4764 HOGENOM:HOG000271906 OMA:FMGWFIY OrthoDB:POG091H0555 ProteinModelPortal:Q47WU0 STRING:1…	206	5	201	95.63	228	2e-58	102/197	51	139/197	70	1/197	0	1
gene2647	NC_004603.1	2726787	2727221	-	protein_coding	VP2581	.	1190105	.	NP_798960.1	hypothetical protein	2.03467	3.0487	0.0340935	0.120362	3.47928	2.578	2.578	3.47928	15	39	10.1216	26.3493	435	4	400	91.26	UNIPROTKB|Q9KPA3 - symbol:VC_2470 "Uncharacterized protein" species:243277 "Vibrio cholerae O1 biovar El Tor str. N16961" [GO:0003674 "molecular_function" evidence=ND] [GO:0005575 "cellular_component" evidence=ND] [GO:0008150 "biological_process" evidence=ND] GO:GO:0016021 EMBL:AE003852 Proteomes:UP000000584 PIR:C82074 STRING:243277.VC2470 DNASU:2613012 EnsemblBacteria:AAF95612 OMA:IAICIIW BioCyc…	148	6	136	88.51	55.1	1e-06	48/133	36	65/133	48	3/133	2	1
gene2651	NC_004603.1	2729927	2730133	+	protein_coding	VP2585	.	1190109	.	NP_798964.1	hypothetical protein	-2.83376	8.74288	3.93383e-12	1.13653e-10	7.80962	9.30832	9.30832	7.80962	1910	858	2708.39	1218.18	207	1	205	99.03	UNIPROTKB|Q9KPA0 - symbol:VC_2473 "Uncharacterized protein" species:243277 "Vibrio cholerae O1 biovar El Tor str. N16961" [GO:0003674 "molecular_function" evidence=ND] [GO:0005575 "cellular_component" evidence=ND] [GO:0008150 "biological_process" evidence=ND] EMBL:AE003852 Proteomes:UP000000584 PIR:C82071 RefSeq:NP_232102.1 RefSeq:WP_001882146.1 ProteinModelPortal:Q9KPA0 STRING:243277.VC2473 DNAS…	77	10	77	88.31	127.5	9e-29	58/68	85	65/68	95	0/68	0	1
gene2669	NC_004603.1	2747164	2748057	+	protein_coding	VP2603	.	1190127	.	NP_798982.1	iron-regulated virulence regulatory protein	-12.3473	7.53986	2.79071e-45	9.11702e-43	4.85069	8.43185	8.43185	4.85069	1039	107	341.135	35.1755	894	1	889	99.44	TIGR_CMR|VC_0474 - symbol:VC_0474 "iron-regulated virulence regulatory protein IrgB" species:686 "Vibrio cholerae O1 biovar El Tor" [GO:0003700 "DNA binding transcription factor activity" evidence=ISS] [GO:0006355 "regulation of transcription, DNA-templated" evidence=ISS] InterPro:IPR000847 Pfam:PF00126 PROSITE:PS50931 Pfam:PF03466 GO:GO:0009405 GO:GO:0003700 GO:GO:0003677 Gene3D:1.10.10.10 Inter…	298	1	298	100	330.9	2e-89	163/298	54	209/298	70	2/298	0	1
gene2718	NC_004603.1	2783178	2784188	-	protein_coding	VP2632	.	1190176	.	NP_799011.1	LacI family transcription regulator	2.37068	6.45038	3.77175e-07	5.52367e-06	6.9405	5.71062	5.71062	6.9405	155	468	45.0017	136.047	1011	1	1000	98.91	UNIPROTKB|Q9KSH0 - symbol:VC_1286 "Transcriptional regulator, LacI family" species:243277 "Vibrio cholerae O1 biovar El Tor str. N16961" [GO:0003700 "DNA binding transcription factor activity" evidence=ISS] [GO:0006355 "regulation of transcription, DNA-templated" evidence=ISS] InterPro:IPR000843 InterPro:IPR010982 Pfam:PF00356 PRINTS:PR00036 PROSITE:PS50932 SMART:SM00354 GO:GO:0006355 GO:GO:00037…	340	1	333	97.94	514.2	2e-144	257/333	77	290/333	87	0/333	0	1
gene2735	NC_004603.1	2802058	2802576	+	protein_coding	VP2648	.	1190193	.	NP_799027.1	acetyltransferase	2.29021	3.06857	0.0133442	0.0584256	3.5451	2.49562	2.49562	3.5451	14	41	7.91788	23.2172	519	4	517	99.04	TIGR_CMR|SO_0916 - symbol:SO_0916 "transcriptional regulator, MarR family" species:211586 "Shewanella oneidensis MR-1" [GO:0006355 "regulation of transcription, DNA-templated" evidence=ISS] [GO:0016564 "obsolete transcription repressor activity" evidence=ISS] InterPro:IPR000182 InterPro:IPR000835 Pfam:PF00583 Pfam:PF01047 PRINTS:PR00598 PROSITE:PS50995 PROSITE:PS51186 SMART:SM00347 GO:GO:0003700 …	309	136	306	55.34	209.9	4e-53	100/171	58	122/171	71	0/171	0	1
gene2747	NC_004603.1	2811631	2811951	-	protein_coding	VP2660	.	1190205	.	NP_799039.1	anti-sigma B factor antagonist	2.1203	5.51756	6.24625e-05	0.00059082	5.95825	4.89882	4.89882	5.95825	87	235	79.5541	215.158	321	10	304	91.9	UNIPROTKB|Q9KP60 - symbol:VC_2516 "Anti-sigma B factor antagonist, putative" species:243277 "Vibrio cholerae O1 biovar El Tor str. N16961" [GO:0006355 "regulation of transcription, DNA-templated" evidence=ISS] GO:GO:0006355 EMBL:AE003852 Proteomes:UP000000584 Gene3D:3.30.750.24 InterPro:IPR002645 InterPro:IPR036513 SUPFAM:SSF52091 PROSITE:PS50801 eggNOG:COG3113 KO:K07122 Pfam:PF13466 PIR:F82067 R…	109	2	100	90.83	131.7	8e-30	59/99	59	79/99	79	1/99	1	1
gene2802	NC_004603.1	2873845	2874222	-	protein_coding	VP2716	.	1190260	.	NP_799094.1	hypothetical protein	-2.56287	6.65084	1.49261e-08	2.79256e-07	5.83866	7.18153	7.18153	5.83866	435	216	337.789	167.941	378	186	3	48.68	UNIPROTKB|Q9KUW8 - symbol:VC_0391 "Aspartokinase" species:243277 "Vibrio cholerae O1 biovar El Tor str. N16961" [GO:0004072 "aspartate kinase activity" evidence=ISS] [GO:0009089 "lysine biosynthetic process via diaminopimelate" evidence=ISS] InterPro:IPR001341 InterPro:IPR005260 InterPro:IPR018042 PIRSF:PIRSF000726 PROSITE:PS00324 UniPathway:UPA00034 UniPathway:UPA00050 InterPro:IPR002912 InterPr…	479	20	80	12.73	101.3	1e-20	51/61	83	53/61	86	0/61	0	-2
gene2817	NC_004603.1	2893318	2893533	-	protein_coding	VP2725	.	1190275	pspG	NP_799104.2	phage shock protein G	-2.74096	6.75369	9.51207e-10	2.07168e-08	5.8711	7.31062	7.31062	5.8711	476	221	646.847	300.699	216	1	160	74.07	UNIPROTKB|P32696 - symbol:pspG "phage shock protein G" species:83333 "Escherichia coli K-12" [GO:0009271 "phage shock" evidence=IEP] [GO:0005886 "plasma membrane" evidence=RCA] GO:GO:0016021 GO:GO:0005886 EMBL:U00096 EMBL:AP009048 Proteomes:UP000000318 Proteomes:UP000000625 EMBL:U00006 GO:GO:0009271 PIR:A65213 RefSeq:NP_418474.4 RefSeq:WP_000891404.1 ProteinModelPortal:P32696 BioGrid:4263114 STRI…	80	1	53	66.25	57.8	9e-08	24/53	45	40/53	75	0/53	0	1
gene2845	NC_004603.1	2918352	2919080	+	protein_coding	VP2753	.	1190303	.	NP_799132.1	peroxiredoxin family protein/glutaredoxin	3.93122	6.65422	2.40431e-15	9.15578e-14	7.32241	5.37267	5.37267	7.32241	122	611	49.1225	246.325	729	1	724	99.31	TIGR_CMR|VC_2637 - symbol:VC_2637 "peroxiredoxin family protein/glutaredoxin" species:686 "Vibrio cholerae O1 biovar El Tor" [GO:0008152 "metabolic process" evidence=ISS] [GO:0030508 "obsolete thiol-disulfide exchange intermediate activity" evidence=ISS] InterPro:IPR002109 InterPro:IPR011767 InterPro:IPR013740 Pfam:PF00462 Pfam:PF08534 PROSITE:PS00195 PROSITE:PS51354 GO:GO:0009055 EMBL:AE003852 P…	247	5	245	97.57	451.4	1e-125	209/241	86	228/241	94	0/241	0	1
gene2854	NC_004603.1	2929909	2930448	+	protein_coding	VP2762	.	1190312	.	NP_799141.1	hypothetical protein	-2.21599	10.6365	3.84974e-08	6.70076e-07	9.95234	11.0995	11.0995	9.95234	6618	3802	3597.34	2069.25	540	1	535	99.07	UNIPROTKB|Q9X399 - symbol:aphA "Putative uncharacterized protein aphA" species:666 "Vibrio cholerae" [GO:0003674 "molecular_function" evidence=ND] [GO:0005575 "cellular_component" evidence=ND] [GO:0008150 "biological_process" evidence=ND] Pfam:PF03551 Gene3D:1.10.10.10 InterPro:IPR036388 InterPro:IPR036390 SUPFAM:SSF46785 eggNOG:COG1695 InterPro:IPR005149 EMBL:CP024162 Proteomes:UP000043247 Prote…	179	1	178	99.44	313.2	3e-84	153/178	85	164/178	92	0/178	0	1
gene2860	NC_004603.1	2937425	2937901	-	protein_coding	VP2768	.	1190318	.	NP_799147.1	bacterioferritin	-5.70882	6.39285	7.23808e-22	4.04475e-20	4.69991	7.16829	7.16829	4.69991	431	96	265.221	59.1489	477	1	475	99.58	UNIPROTKB|Q9KUZ3 - symbol:VC_0365 "Ferroxidase" species:243277 "Vibrio cholerae O1 biovar El Tor str. N16961" [GO:0006880 "intracellular sequestering of iron ion" evidence=ISS] [GO:0008199 "ferric iron binding" evidence=ISS] InterPro:IPR002024 InterPro:IPR008331 Pfam:PF00210 PIRSF:PIRSF002560 PRINTS:PR00601 PROSITE:PS00549 InterPro:IPR009078 EMBL:AE003852 Proteomes:UP000000584 GO:GO:0005623 Gene3…	158	1	158	100	298.9	5e-80	140/158	88	154/158	97	0/158	0	1
gene2861	NC_004603.1	2937994	2938182	-	protein_coding	VP2769	.	1190319	.	NP_799148.1	bacterioferritin-associated ferredoxin	-48.1619	5.51191	3.41874e-43	9.07461e-41	1.49683	6.49953	6.49953	1.49683	270	7	419.324	10.885	189	1	187	98.94	UNIPROTKB|Q9KUZ4 - symbol:VC_0364 "Bacterioferritin-associated ferredoxin" species:243277 "Vibrio cholerae O1 biovar El Tor str. N16961" [GO:0006880 "intracellular sequestering of iron ion" evidence=ISS] [GO:0051537 "2 iron, 2 sulfur cluster binding" evidence=IBA] Pfam:PF04324 GO:GO:0071281 EMBL:AE003852 Proteomes:UP000000584 GO:GO:0005623 GO:GO:0051537 eggNOG:ENOG4105W53 eggNOG:COG2906 KO:K02192…	62	1	62	100	99.8	2e-20	43/62	69	54/62	87	0/62	0	1
gene2864	NC_004603.1	2942090	2942560	-	protein_coding	VP2772	.	1190322	.	NP_799151.1	30S ribosomal protein S7	-2.27239	12.0181	1.20812e-08	2.29058e-07	11.3082	12.4921	12.4921	11.3082	17380	9737	10831.2	6075.73	471	1	469	99.58	UNIPROTKB|Q9KUZ8 - symbol:rpsG "30S ribosomal protein S7" species:243277 "Vibrio cholerae O1 biovar El Tor str. N16961" [GO:0000028 "ribosomal small subunit assembly" evidence=IBA] [GO:0003729 "mRNA binding" evidence=IBA] [GO:0003735 "structural constituent of ribosome" evidence=ISS;IBA] [GO:0006412 "translation" evidence=ISS;IBA] [GO:0019843 "rRNA binding" evidence=IBA] [GO:0022627 "cytosolic sm…	156	1	156	100	299.3	4e-80	151/156	96	155/156	99	0/156	0	1
gene2865	NC_004603.1	2942662	2943036	-	protein_coding	VP2773	.	1190323	rpsL	NP_799152.1	30S ribosomal protein S12	-2.54466	12.2916	1.0246e-10	2.55968e-09	11.4664	12.8136	12.8136	11.4664	21719	10866	17000.3	8515.94	375	1	373	99.47	UNIPROTKB|Q9KUZ9 - symbol:rpsL "30S ribosomal protein S12" species:243277 "Vibrio cholerae O1 biovar El Tor str. N16961" [GO:0003735 "structural constituent of ribosome" evidence=ISS;IBA] [GO:0005840 "ribosome" evidence=IBA] [GO:0006412 "translation" evidence=ISS;IBA] InterPro:IPR005679 InterPro:IPR006032 Pfam:PF00164 PIRSF:PIRSF002133 PRINTS:PR01034 PROSITE:PS00055 GO:GO:0006412 EMBL:AE003852 Pr…	124	1	124	100	250	2e-65	122/124	98	122/124	98	0/124	0	1
gene2901	NC_004603.1	2973455	2974639	+	protein_coding	VP2809	.	1190359	.	NP_799188.1	nitric oxide dioxygenase	-2.71208	5.68752	5.97299e-08	1.01065e-06	4.83762	6.246	6.246	4.83762	226	106	55.9807	26.2894	1185	1	1183	99.83	UNIPROTKB|P24232 - symbol:hmp "nitric oxide dioxygenase" species:83333 "Escherichia coli K-12" [GO:0071500 "cellular response to nitrosative stress" evidence=IBA] [GO:0046210 "nitric oxide catabolic process" evidence=IBA] [GO:0005622 "intracellular" evidence=IBA] [GO:0032843 "hydroperoxide reductase activity" evidence=IDA] [GO:0005504 "fatty acid binding" evidence=IDA] [GO:0071949 "FAD binding" e…	396	1	396	100	497.7	2e-139	245/396	61	291/396	73	2/396	0	1
gene2902	NC_004603.1	2974722	2975357	-	protein_coding	VP2811	.	1190360	.	NP_799189.1	sodium-type polar flagellar protein MotX	-11.9926	10.7368	7.85881e-55	6.67527e-52	8.04253	11.6218	11.6218	8.04253	9506	1009	4387.22	466.26	636	1	634	99.69	UNIPROTKB|Q9KNX9 - symbol:VC_2601 "Sodium-type flagellar protein MotX" species:243277 "Vibrio cholerae O1 biovar El Tor str. N16961" [GO:0005198 "structural molecule activity" evidence=ISS] [GO:0009288 "bacterial-type flagellum" evidence=ISS] EMBL:AE003852 Proteomes:UP000000584 GO:GO:0005198 eggNOG:COG0790 InterPro:IPR006597 SMART:SM00671 GO:GO:0009288 Pfam:PF08238 PIR:E82055 RefSeq:NP_232229.1 R…	211	1	211	100	271.6	1e-71	164/211	77	181/211	85	0/211	0	1
gene2932	NC_004603.1	2994794	2996674	+	protein_coding	VP2827	.	1190390	.	NP_799206.1	methyl-accepting chemotaxis protein	-2.80378	7.41868	6.73611e-11	1.73383e-09	6.50477	7.98226	7.98226	6.50477	760	345	118.597	53.9044	1881	1	1774	94.31	UNIPROTKB|Q9KSG7 - symbol:VC_1289 "Methyl-accepting chemotaxis protein" species:243277 "Vibrio cholerae O1 biovar El Tor str. N16961" [GO:0004871 "signal transducer activity" evidence=ISS] [GO:0004872 "receptor activity" evidence=ISS] [GO:0006935 "chemotaxis" evidence=ISS] InterPro:IPR003660 InterPro:IPR004089 InterPro:IPR004090 Pfam:PF00015 Pfam:PF00672 PRINTS:PR00260 PROSITE:PS50111 PROSITE:PS5…	631	5	596	93.82	264.6	4e-69	271/595	45	347/595	58	7/595	1	1
gene2945	NC_004603.1	3007943	3009742	+	protein_coding	VP2840	.	1190403	.	NP_799219.1	fumarate reductase flavoprotein subunit	6.24163	10.6851	1.97154e-33	2.26301e-31	11.4702	8.83087	8.83087	11.4702	1371	10895	223.57	1778.89	1800	1	1795	99.72	UNIPROTKB|Q9KNS5 - symbol:VC_2656 "Fumarate reductase flavoprotein subunit" species:243277 "Vibrio cholerae O1 biovar El Tor str. N16961" [GO:0000104 "succinate dehydrogenase activity" evidence=ISS] [GO:0009061 "anaerobic respiration" evidence=ISS] InterPro:IPR003952 InterPro:IPR005884 InterPro:IPR014006 InterPro:IPR015939 InterPro:IPR037099 Pfam:PF02910 PROSITE:PS00504 Pfam:PF00890 InterPro:IPR0…	602	1	601	99.83	1135.2	0	559/601	93	574/601	95	3/601	0	1
gene2946	NC_004603.1	3009742	3010482	+	protein_coding	VP2841	.	1190404	.	NP_799220.1	fumarate reductase iron-sulfur subunit	8.86977	9.13087	7.73909e-42	1.826e-39	9.97528	6.83721	6.83721	9.97528	342	3863	135.474	1532.15	741	1	730	98.52	UNIPROTKB|Q9KNS4 - symbol:VC_2657 "Succinate dehydrogenase iron-sulfur subunit" species:243277 "Vibrio cholerae O1 biovar El Tor str. N16961" [GO:0000104 "succinate dehydrogenase activity" evidence=ISS] [GO:0009061 "anaerobic respiration" evidence=ISS] InterPro:IPR001041 InterPro:IPR004489 InterPro:IPR006058 InterPro:IPR009051 InterPro:IPR025192 InterPro:IPR036010 Pfam:PF13085 PROSITE:PS00197 PRO…	252	1	243	96.43	479.2	5e-134	225/243	92	234/243	96	0/243	0	1
gene2947	NC_004603.1	3010485	3010868	+	protein_coding	VP2842	.	1190405	.	NP_799221.1	fumarate reductase subunit C	6.67939	6.2283	4.24777e-23	2.65298e-21	7.01788	4.33783	4.33783	7.01788	58	494	44.3348	378.085	384	1	382	99.48	UNIPROTKB|Q9KNS3 - symbol:frdC "Fumarate reductase subunit C" species:243277 "Vibrio cholerae O1 biovar El Tor str. N16961" [GO:0000104 "succinate dehydrogenase activity" evidence=ISS] [GO:0009061 "anaerobic respiration" evidence=ISS] HAMAP:MF_00708 InterPro:IPR003510 InterPro:IPR034804 Pfam:PF02300 PIRSF:PIRSF000180 ProDom:PD015900 GO:GO:0016021 GO:GO:0005886 EMBL:AE003852 Proteomes:UP000000584 …	127	1	127	100	230.3	2e-59	112/127	88	119/127	93	0/127	0	1
gene2948	NC_004603.1	3010880	3011257	+	protein_coding	VP2843	.	1190406	.	NP_799222.1	fumarate reductase subunit D	6.75644	8.29244	6.05859e-32	6.43271e-30	9.09096	6.3493	6.3493	9.09096	243	2091	188.696	1625.76	378	19	376	94.71	UNIPROTKB|Q9KNS2 - symbol:frdD "Fumarate reductase subunit D" species:243277 "Vibrio cholerae O1 biovar El Tor str. N16961" [GO:0000104 "succinate dehydrogenase activity" evidence=ISS] [GO:0009061 "anaerobic respiration" evidence=ISS] InterPro:IPR003418 HAMAP:MF_00709 InterPro:IPR034804 Pfam:PF02313 PIRSF:PIRSF000179 ProDom:PD015693 GO:GO:0016021 GO:GO:0005886 EMBL:AE003852 Proteomes:UP000000584 …	130	12	130	91.54	226.9	2e-58	104/119	87	114/119	95	0/119	0	1
gene2958	NC_004603.1	3020404	3020619	-	protein_coding	VP2854	.	1190416	.	NP_799232.1	hypothetical protein	-2.52251	2.20634	0.048953	0.158584	1.74108	2.8002	2.8002	1.74108	18	9	24.4606	12.2457	216				No hit
gene2962	NC_004603.1	3024258	3024770	-	protein_coding	VP2857	.	1190420	cpxP	NP_799236.1	periplasmic repressor CpxP	-4.51932	9.84055	9.01631e-24	5.89112e-22	8.38009	10.5529	10.5529	8.38009	4530	1276	2591.96	731.017	513	1	499	97.27	TIGR_CMR|VC_2691 - symbol:VC_2691 "periplasmic protein cpxP, putative" species:686 "Vibrio cholerae O1 biovar El Tor" [GO:0006950 "response to stress" evidence=ISS] InterPro:IPR012899 Pfam:PF07813 PIRSF:PIRSF034445 EMBL:AE003852 Proteomes:UP000000584 GO:GO:0042597 eggNOG:COG3678 KO:K06006 CDD:cd09916 PIR:A82046 RefSeq:NP_232319.1 RefSeq:WP_000761521.1 STRING:243277.VC2691 DNASU:2615519 EnsemblBac…	167	1	162	97.01	147.5	2e-34	80/166	48	109/166	65	4/166	2	1
gene2964	NC_004603.1	3025650	3027053	+	protein_coding	VP2859	.	1190422	cpxA	NP_799238.1	two-component sensor protein	2.16835	6.87534	1.92477e-06	2.45481e-05	7.3271	6.22058	6.22058	7.3271	222	613	46.4124	128.318	1404	13	1387	97.93	UNIPROTKB|Q9KNN8 - symbol:VC_2693 "Sensor protein CpxA" species:243277 "Vibrio cholerae O1 biovar El Tor str. N16961" [GO:0000155 "phosphorelay sensor kinase activity" evidence=ISS] [GO:0000160 "phosphorelay signal transduction system" evidence=ISS] InterPro:IPR003660 InterPro:IPR003661 InterPro:IPR004358 InterPro:IPR036097 Pfam:PF00512 Pfam:PF00672 PRINTS:PR00344 PROSITE:PS50885 SMART:SM00304 SM…	464	2	461	99.14	599.7	4e-170	310/460	67	377/460	81	2/460	0	1
gene2965	NC_004603.1	3027126	3027734	+	protein_coding	VP2860	.	1190423	.	NP_799239.1	superoxide dismutase, Mn	-7.16591	5.82124	6.57241e-23	3.93141e-21	3.88721	6.64517	6.64517	3.88721	299	53	144.113	25.5772	609	1	604	99.18	TIGR_CMR|VC_2694 - symbol:VC_2694 "superoxide dismutase, Mn" species:686 "Vibrio cholerae O1 biovar El Tor" [GO:0006801 "superoxide metabolic process" evidence=ISS] InterPro:IPR001189 InterPro:IPR019831 InterPro:IPR019832 InterPro:IPR019833 Pfam:PF00081 Pfam:PF02777 PIRSF:PIRSF000349 PRINTS:PR01703 PROSITE:PS00088 GO:GO:0071281 GO:GO:0046872 EMBL:AE003852 Proteomes:UP000000584 GO:GO:0004784 KO:K0…	222	18	218	90.54	324.3	2e-87	148/201	73	166/201	82	0/201	0	1
gene2968	NC_004603.1	3029374	3030825	+	protein_coding	VP2863	.	1190426	aspA	NP_799242.1	aspartate ammonia-lyase	2.03095	11.2941	8.56948e-07	1.17782e-05	11.7164	10.6947	10.6947	11.7164	4998	12923	1010.36	2615.72	1452	1	1450	99.86	UNIPROTKB|Q9KNN3 - symbol:VC_2698 "Aspartate ammonia-lyase" species:243277 "Vibrio cholerae O1 biovar El Tor str. N16961" [GO:0005829 "cytosol" evidence=IBA] [GO:0006520 "cellular amino acid metabolic process" evidence=ISS] [GO:0006531 "aspartate metabolic process" evidence=IBA] [GO:0008652 "cellular amino acid biosynthetic process" evidence=IBA] [GO:0008797 "aspartate ammonia-lyase activity" evi…	483	1	483	100	881.3	8e-255	433/483	89	464/483	96	0/483	0	1
gene2971	NC_004603.1	3034505	3035134	+	protein_coding	VP2866	.	1190429	.	NP_799245.1	LuxR family transcriptional regulator	2.08994	8.22817	1.06037e-06	1.42063e-05	8.66367	7.60394	7.60394	8.66367	584	1554	272.095	724.944	630	1	628	99.68	UNIPROTKB|Q9KNN0 - symbol:VC_2702 "Transcriptional regulator, LuxR family" species:243277 "Vibrio cholerae O1 biovar El Tor str. N16961" [GO:0003700 "DNA binding transcription factor activity" evidence=ISS] [GO:0006355 "regulation of transcription, DNA-templated" evidence=ISS] InterPro:IPR000792 InterPro:IPR001789 InterPro:IPR016032 Pfam:PF00072 Pfam:PF00196 PRINTS:PR00038 PROSITE:PS00622 PROSITE…	209	1	209	100	361.7	9e-99	183/209	87	196/209	93	0/209	0	1
gene2973	NC_004603.1	3037330	3037593	+	protein_coding	VP2868	.	1190431	.	NP_799247.1	hypothetical protein	-5.159	9.27951	1.07771e-26	8.63591e-25	7.66353	10.0251	10.0251	7.66353	3141	775	3492.31	862.763	264	1	262	99.24	UNIPROTKB|Q9KNM8 - symbol:VC_2704 "Uncharacterized protein" species:243277 "Vibrio cholerae O1 biovar El Tor str. N16961" [GO:0003674 "molecular_function" evidence=ND] [GO:0005575 "cellular_component" evidence=ND] [GO:0008150 "biological_process" evidence=ND] GO:GO:0016021 EMBL:AE003852 Proteomes:UP000000584 eggNOG:COG4327 InterPro:IPR019886 Pfam:PF13937 TIGRFAMs:TIGR03647 eggNOG:ENOG4105NW6 OMA:…	88	1	87	98.86	114	1e-24	49/87	56	65/87	74	0/87	0	1
gene2974	NC_004603.1	3037789	3039333	+	protein_coding	VP2869	.	1190432	.	NP_799248.1	sodium/solute symporter	-2.36278	10.1471	3.47869e-09	7.24215e-08	9.39921	10.6385	10.6385	9.39921	4807	2590	913.259	492.68	1545	1	1543	99.87	UNIPROTKB|Q47UD2 - symbol:CPS_4952 "Sodium/solute symporter family protein" species:167879 "Colwellia psychrerythraea 34H" [GO:0006810 "transport" evidence=ISM] [GO:0015370 "solute:sodium symporter activity" evidence=ISM] InterPro:IPR001734 Pfam:PF00474 PROSITE:PS50283 GO:GO:0016021 GO:GO:0055085 GO:GO:0005215 EMBL:CP000083 Proteomes:UP000000547 eggNOG:ENOG4107QN1 eggNOG:COG4147 KO:K14393 OMA:IAN…	596	63	596	89.6	743	4e-213	379/534	70	434/534	81	20/534	3	1
gene2977	NC_004603.1	3040102	3040479	+	protein_coding	VP2872	.	1190435	.	NP_799251.1	hypothetical protein	-10.2922	6.44164	1.48803e-33	1.75546e-31	4.03198	7.31663	7.31663	4.03198	478	59	371.18	45.8727	378	1	376	99.47	UNIPROTKB|Q9KRR4 - symbol:VC_1572 "Uncharacterized protein" species:243277 "Vibrio cholerae O1 biovar El Tor str. N16961" [GO:0003674 "molecular_function" evidence=ND] [GO:0005575 "cellular_component" evidence=ND] [GO:0008150 "biological_process" evidence=ND] GO:GO:0071281 EMBL:AE003852 Proteomes:UP000000584 PIR:E82184 RefSeq:NP_231212.1 RefSeq:WP_000431625.1 DNASU:2613951 EnsemblBacteria:AAF9472…	126	1	126	100	140.6	2e-32	68/126	53	93/126	73	1/126	0	1
gene2978	NC_004603.1	3040497	3041882	+	protein_coding	VP2873	.	1190436	fumC	NP_799252.1	fumarate hydratase	-8.95108	8.00352	2.59405e-39	5.24616e-37	5.71542	8.85379	8.85379	5.71542	1393	198	295.01	41.9852	1386	1	1381	99.64	UNIPROTKB|Q9KRR3 - symbol:fumC "Fumarate hydratase class II" species:243277 "Vibrio cholerae O1 biovar El Tor str. N16961" [GO:0004333 "fumarate hydratase activity" evidence=ISS;IBA] [GO:0005829 "cytosol" evidence=IBA] [GO:0006099 "tricarboxylic acid cycle" evidence=ISS;IBA] [GO:0006106 "fumarate metabolic process" evidence=IBA] [GO:0006108 "malate metabolic process" evidence=IBA] [GO:0051262 "pr…	461	1	460	99.78	715.7	5e-205	365/460	79	407/460	88	0/460	0	1
gene2981	NC_004603.1	3046943	3048769	+	protein_coding	VP2876	.	1190439	.	NP_799255.1	hypothetical protein	-2.33037	8.22815	2.20435e-08	4.01797e-07	7.49888	8.71504	8.71504	7.49888	1265	691	203.236	111.156	1827	1	1825	99.89	UNIPROTKB|Q9KV57 - symbol:VC_0300 "Uncharacterized protein" species:243277 "Vibrio cholerae O1 biovar El Tor str. N16961" [GO:0003674 "molecular_function" evidence=ND] [GO:0005575 "cellular_component" evidence=ND] [GO:0008150 "biological_process" evidence=ND] InterPro:IPR005105 InterPro:IPR006669 Pfam:PF03445 InterPro:IPR000595 Pfam:PF00027 InterPro:IPR000644 Gene3D:2.60.120.10 InterPro:IPR014710…	607	1	607	100	899.4	3e-260	446/608	73	527/608	86	1/608	0	1
gene2982	NC_004603.1	3048802	3049431	+	protein_coding	VP2877	.	1190440	.	NP_799256.1	DNA polymerase III subunit epsilon	-2.07691	7.06746	4.14917e-06	4.96381e-05	6.45854	7.50476	7.50476	6.45854	545	334	253.924	155.812	630	1	622	98.73	UNIPROTKB|Q9KV58 - symbol:VC_0299 "DNA polymerase III, epsilon subunit, putative" species:243277 "Vibrio cholerae O1 biovar El Tor str. N16961" [GO:0003887 "DNA-directed DNA polymerase activity" evidence=ISS] [GO:0006260 "DNA replication" evidence=ISS] [GO:0009360 "DNA polymerase III complex" evidence=ISS] InterPro:IPR036397 InterPro:IPR012337 Pfam:PF00929 GO:GO:0005829 EMBL:AE003852 Proteomes:UP…	223	15	221	92.83	353.6	2e-96	170/207	82	188/207	90	0/207	0	1
gene2983	NC_004603.1	3049669	3051621	+	protein_coding	VP2878	.	1190441	.	NP_799257.1	acetyl-CoA synthetase	-2.26103	9.74651	2.26792e-08	4.0818e-07	9.04336	10.2189	10.2189	9.04336	3593	2023	540.012	304.43	1953	1	1948	99.74	UNIPROTKB|Q9KV59 - symbol:acsA "Acetyl-coenzyme A synthetase" species:243277 "Vibrio cholerae O1 biovar El Tor str. N16961" [GO:0003987 "acetate-CoA ligase activity" evidence=ISS] [GO:0019427 "acetyl-CoA biosynthetic process from acetate" evidence=ISS] HAMAP:MF_01123 InterPro:IPR000873 InterPro:IPR011904 Pfam:PF00501 Prosite:PS00455 GO:GO:0005524 GO:GO:0046872 InterPro:IPR025110 InterPro:IPR02084…	649	1	648	99.85	1201.4	0	579/649	89	615/649	94	1/649	0	1
gene3063	NC_004603.1	3138996	3139451	+	protein_coding	VP2935	.	1190521	.	NP_799314.1	RNA-binding protein	3.29826	6.48052	5.59969e-12	1.60688e-10	7.09408	5.39557	5.39557	7.09408	124	521	79.8188	335.789	456	1	454	99.56	UNIPROTKB|Q9KVI6 - symbol:VC_0159 "RNA-binding protein" species:243277 "Vibrio cholerae O1 biovar El Tor str. N16961" [GO:0003723 "RNA binding" evidence=ISS] [GO:0016070 "RNA metabolic process" evidence=ISS] InterPro:IPR000504 InterPro:IPR035979 Pfam:PF00076 PROSITE:PS50102 SMART:SM00360 GO:GO:0003723 EMBL:AE003852 Proteomes:UP000000584 SUPFAM:SSF54928 GO:GO:0016070 eggNOG:COG0724 eggNOG:ENOG4105…	152	1	152	100	173.3	3e-42	93/153	60	116/153	75	3/153	1	1
gene3072	NC_004603.1	3148707	3149561	-	protein_coding	VP2944	.	1190530	.	NP_799323.1	O-methyltransferase-like protein	-11.2139	8.48331	1.64279e-47	7.75216e-45	5.89654	9.36235	9.36235	5.89654	1983	225	680.777	77.3411	855	1	853	99.77	UNIPROTKB|Q9KVQ0 - symbol:VC_0091 "O-methyltransferase-related protein" species:243277 "Vibrio cholerae O1 biovar El Tor str. N16961" [GO:0003674 "molecular_function" evidence=ND] [GO:0005575 "cellular_component" evidence=ND] [GO:0005829 "cytosol" evidence=IBA] [GO:0008150 "biological_process" evidence=ND] [GO:0008757 "S-adenosylmethionine-dependent methyltransferase activity" evidence=IBA] [GO:0…	289	5	289	98.62	300.4	3e-80	150/285	52	187/285	65	1/285	0	1
gene3091	NC_004603.1	3164266	3164445	+	protein_coding	VP2963	.	1190549	.	NP_799342.1	hypothetical protein	-5.07339	6.2648	4.17963e-19	1.97232e-17	4.71428	7.01408	7.01408	4.71428	387	97	631.083	158.377	180				No hit
gene3095	NC_004603.1	3166714	3167094	+	protein_coding	VP2967	.	1190553	.	NP_799346.1	hypothetical protein	2.01662	4.19148	0.00438897	0.0230978	4.61049	3.65527	3.65527	4.61049	35	90	26.9644	69.4243	381				No hit
gene3110	NC_004603.1	3181707	3182411	-	protein_coding	VP2982	.	1190568	.	NP_799361.1	hypothetical protein	2.08067	7.5482	2.49514e-06	3.12591e-05	7.98143	6.93031	6.93031	7.98143	365	967	151.968	403.117	705	1	700	99.29	UNIPROTKB|Q9KVL5 - symbol:VC_0127 "Uncharacterized protein" species:243277 "Vibrio cholerae O1 biovar El Tor str. N16961" [GO:0003674 "molecular_function" evidence=ND] [GO:0005575 "cellular_component" evidence=ND] [GO:0008150 "biological_process" evidence=ND] EMBL:AE003852 Proteomes:UP000000584 Gene3D:3.30.450.40 InterPro:IPR029016 eggNOG:ENOG4105CT0 eggNOG:COG3159 KO:K09921 OMA:FQVPFVS InterPro:…	232	1	232	100	301.6	1e-80	149/233	63	181/233	77	1/233	0	1
gene3144	NC_004603.1	3213009	3213668	+	protein_coding	VP3010	.	1190602	.	NP_799389.1	hypothetical protein	2.12788	6.1772	1.32113e-05	0.000143499	6.61998	5.54641	5.54641	6.61998	138	374	61.3739	166.541	660	1	637	96.52	UNIPROTKB|Q9KVF5 - symbol:VC_0191 "Uncharacterized protein" species:243277 "Vibrio cholerae O1 biovar El Tor str. N16961" [GO:0003674 "molecular_function" evidence=ND] [GO:0005575 "cellular_component" evidence=ND] [GO:0005886 "plasma membrane" evidence=IBA] [GO:0006865 "amino acid transport" evidence=IBA] [GO:0008150 "biological_process" evidence=ND] [GO:0015171 "amino acid transmembrane transpor…	222	1	210	94.59	255	1e-66	131/212	61	162/212	76	2/212	0	1
gene3145	NC_004603.1	3213779	3215539	+	protein_coding	VP3011	.	1190603	.	NP_799390.1	gamma-glutamyltranspeptidase	2.82169	6.15418	4.60487e-09	9.31279e-08	6.71241	5.23979	5.23979	6.71241	111	399	18.5017	66.5898	1761	1	1759	99.89	UNIPROTKB|Q9KVF2 - symbol:VC_0194 "Gamma-glutamyltranspeptidase" species:243277 "Vibrio cholerae O1 biovar El Tor str. N16961" [GO:0003840 "obsolete gamma-glutamyltransferase activity" evidence=ISS] [GO:0006750 "glutathione biosynthetic process" evidence=ISS] InterPro:IPR000101 EMBL:AE003852 Proteomes:UP000000584 InterPro:IPR029055 SUPFAM:SSF56235 GO:GO:0006751 GO:GO:0006750 eggNOG:COG0405 GO:GO:…	588	5	588	99.32	877.5	1e-253	431/586	73	492/586	83	2/586	0	1
gene3146	NC_004603.1	3216021	3216203	-	protein_coding	VP3012	.	1190604	.	NP_799391.1	hypothetical protein	-3.16307	14.3353	2.41452e-15	9.15578e-14	13.2778	14.939	14.939	13.2778	94778	38147	152021	61263.7	183				No hit
gene3152	NC_004603.1	3221258	3221542	-	protein_coding	VP3018	.	1190610	.	NP_799397.1	hypothetical protein	-2.63945	7.85762	2.92082e-10	6.81579e-09	7.00332	8.39681	8.39681	7.00332	1014	489	1044.34	504.264	285	1	283	99.3	UNIPROTKB|Q9KVR9 - symbol:VC_0070 "Uncharacterized protein" species:243277 "Vibrio cholerae O1 biovar El Tor str. N16961" [GO:0003674 "molecular_function" evidence=ND] [GO:0005575 "cellular_component" evidence=ND] [GO:0008150 "biological_process" evidence=ND] InterPro:IPR027454 EMBL:AE003852 Proteomes:UP000000584 GO:GO:0046983 Gene3D:1.10.287.1050 PIR:F82367 RefSeq:NP_229729.1 RefSeq:WP_000060371…	94	1	94	100	159.1	4e-38	80/94	85	90/94	95	0/94	0	1
gene3158	NC_004603.1	3227966	3228169	-	protein_coding	VP3024	.	1190616	.	NP_799403.1	sulfur carrier protein ThiS	4.07647	1.71603	0.0384743	0.131881	2.36879	0.995829	0.995829	2.36879	3	16	4.31658	23.0507	204	1	202	99.02	UNIPROTKB|Q9KVS5 - symbol:VC_0064 "ThiS protein" species:243277 "Vibrio cholerae O1 biovar El Tor str. N16961" [GO:0003824 "catalytic activity" evidence=ISS] [GO:0009228 "thiamine biosynthetic process" evidence=ISS] Pfam:PF02597 InterPro:IPR003749 Gene3D:3.10.20.30 InterPro:IPR012675 GO:GO:0003824 EMBL:AE003852 Proteomes:UP000000584 GO:GO:0009228 InterPro:IPR016155 SUPFAM:SSF54285 InterPro:IPR010…	85	19	85	78.82	78.2	6e-14	37/67	55	48/67	71	0/67	0	1
gene3160	NC_004603.1	3229021	3230355	-	protein_coding	VP3026	.	1190618	thiE	NP_799405.1	thiamine-phosphate pyrophosphorylase	2.85741	2.70706	0.00916578	0.0430133	3.2616	1.99374	1.99374	3.2616	9	33	1.97883	7.26485	1335	1	1270	95.13	UNIPROTKB|Q9KVS7 - symbol:VC_0062 "Thiamine-phosphate synthase" species:243277 "Vibrio cholerae O1 biovar El Tor str. N16961" [GO:0004789 "thiamine-phosphate diphosphorylase activity" evidence=ISS;IBA] [GO:0005737 "cytoplasm" evidence=IBA] [GO:0009228 "thiamine biosynthetic process" evidence=ISS;IBA] HAMAP:MF_00097 InterPro:IPR013785 InterPro:IPR034291 UniPathway:UPA00060 Pfam:PF02581 GO:GO:00057…	440	1	402	91.36	335.1	2e-90	202/424	47	253/424	59	23/424	5	1
gene3187	NC_004603.1	3253189	3254634	+	protein_coding	VP3046	.	1190645	.	NP_799425.1	potassium uptake protein TrkH	2.2255	5.71944	1.49916e-05	0.000161188	6.18164	5.05079	5.05079	6.18164	97	275	19.6903	55.8931	1446	1	1441	99.65	UNIPROTKB|Q9KVU7 - symbol:VC_0042 "Trk system potassium uptake protein" species:243277 "Vibrio cholerae O1 biovar El Tor str. N16961" [GO:0006813 "potassium ion transport" evidence=ISS] [GO:0015079 "potassium ion transmembrane transporter activity" evidence=ISS] InterPro:IPR003445 InterPro:IPR004772 Pfam:PF02386 PIRSF:PIRSF006247 GO:GO:0016021 GO:GO:0005886 GO:GO:0046872 EMBL:AE003852 Proteomes:U…	481	1	480	99.79	822	5e-237	401/480	83	447/480	93	0/480	0	1
gene3188	NC_004603.1	3254600	3255244	+	protein_coding	VP3047	.	1190646	.	NP_799426.1	hypothetical protein	2.1518	4.40385	0.00105436	0.00699663	4.85069	3.7996	3.7996	4.85069	39	107	17.7482	48.7549	645	46	643	92.71	UNIPROTKB|Q9KVU8 - symbol:VC_0041 "Uncharacterized protein" species:243277 "Vibrio cholerae O1 biovar El Tor str. N16961" [GO:0003674 "molecular_function" evidence=ND] [GO:0005575 "cellular_component" evidence=ND] [GO:0008150 "biological_process" evidence=ND] EMBL:AE003852 Proteomes:UP000000584 PIR:D82372 RefSeq:NP_229700.1 RefSeq:WP_001884376.1 STRING:243277.VC0041 DNASU:2614554 EnsemblBacteria:…	218	29	218	87.16	143.7	4e-33	78/199	39	121/199	60	9/199	4	1
gene3191	NC_004603.1	3257141	3257308	+	protein_coding	VP3050	.	1190649	.	NP_799429.1	hypothetical protein	-3.4959	13.832	1.07578e-17	4.80929e-16	12.6636	14.4691	14.4691	12.6636	68430	24920	119560	43594.6	168	1	166	98.81	UNIPROTKB|Q9KVV1 - symbol:VC_0038 "Uncharacterized protein" species:243277 "Vibrio cholerae O1 biovar El Tor str. N16961" [GO:0003674 "molecular_function" evidence=ND] [GO:0005575 "cellular_component" evidence=ND] [GO:0008150 "biological_process" evidence=ND] EMBL:AE003852 Proteomes:UP000000584 PIR:A82372 RefSeq:NP_229697.1 RefSeq:WP_001889768.1 STRING:243277.VC0038 DNASU:2614548 EnsemblBacteria:…	55	1	55	100	69.3	2e-11	35/55	63	43/55	78	0/55	0	1
gene3198	NC_004603.1	3263159	3264682	-	protein_coding	VP3057	.	1190656	.	NP_799436.1	ComM-like protein	2.08151	4.69044	0.000807521	0.00555842	5.12272	4.10761	4.10761	5.12272	49	130	9.43755	25.0699	1524	1	1522	99.87	UNIPROTKB|Q9KVV6 - symbol:VC_0032 "ComM-related protein" species:243277 "Vibrio cholerae O1 biovar El Tor str. N16961" [GO:0008150 "biological_process" evidence=ND] InterPro:IPR001208 PRINTS:PR01657 PROSITE:PS50051 InterPro:IPR003593 InterPro:IPR000523 InterPro:IPR027417 Pfam:PF01078 SUPFAM:SSF52540 GO:GO:0005524 GO:GO:0003677 EMBL:AE003852 Proteomes:UP000000584 SMART:SM00382 Gene3D:3.30.230.10 I…	507	1	507	100	845.5	5e-244	430/507	84	467/507	92	0/507	0	1
gene3224	NC_004605.1	3876	4808	-	protein_coding	VPA0003	.	1190682	.	NP_799513.1	peptide ABC transporter ATP-binding protein	-5.23753	4.66896	1.76084e-12	5.22957e-11	3.18107	5.4403	5.4403	3.18107	128	31	40.2695	9.76504	933	1	787	84.35	UNIPROTKB|Q9KUA7 - symbol:VC_0616 "Peptide ABC transporter, ATP-binding protein" species:243277 "Vibrio cholerae O1 biovar El Tor str. N16961" [GO:0015833 "peptide transport" evidence=ISS] [GO:0042626 "ATPase activity, coupled to transmembrane movement of substances" evidence=ISS] InterPro:IPR003439 InterPro:IPR013563 InterPro:IPR017871 Pfam:PF00005 Pfam:PF08352 PROSITE:PS00211 PROSITE:PS50893 In…	331	1	270	81.57	311.6	2e-83	158/270	58	201/270	74	8/270	2	1
gene3225	NC_004605.1	4805	5698	-	protein_coding	VPA0004	.	1190683	.	NP_799514.1	peptide ABC transporter ATP-binding protein	-5.24596	4.11904	3.37333e-10	7.82871e-09	2.69302	4.89882	4.89882	2.69302	87	21	28.5647	6.9036	894	79	844	85.68	UNIPROTKB|Q9KUA6 - symbol:VC_0617 "Peptide ABC transporter, ATP-binding protein" species:243277 "Vibrio cholerae O1 biovar El Tor str. N16961" [GO:0015833 "peptide transport" evidence=ISS] [GO:0042626 "ATPase activity, coupled to transmembrane movement of substances" evidence=ISS] InterPro:IPR003439 InterPro:IPR013563 InterPro:IPR017871 Pfam:PF00005 Pfam:PF08352 PROSITE:PS00211 PROSITE:PS50893 In…	327	4	258	77.98	357.8	2e-97	173/255	67	211/255	82	0/255	0	1
gene3226	NC_004605.1	6022	6222	+	protein_coding	VPA0005	.	1190684	.	NP_799515.1	hypothetical protein	2.06174	10.6818	5.50412e-07	7.7404e-06	11.1112	10.068	10.068	11.1112	3236	8494	4725.64	12419.7	201	1	199	99	UNIPROTKB|Q9KNG0 - symbol:VC_A0004 "Uncharacterized protein" species:243277 "Vibrio cholerae O1 biovar El Tor str. N16961" [GO:0003674 "molecular_function" evidence=ND] [GO:0005575 "cellular_component" evidence=ND] [GO:0008150 "biological_process" evidence=ND] Proteomes:UP000000584 EMBL:AE003853 PIR:E82512 RefSeq:NP_232405.1 RefSeq:WP_000026548.1 STRING:243277.VCA0004 DNASU:2612838 EnsemblBacteri…	65	1	65	100	95.1	5e-19	48/66	72	58/66	87	1/66	1	1
gene3235	NC_004605.1	13135	13803	+	protein_coding	VPA0014	.	1190693	.	NP_799524.1	hypothetical protein	2.14955	2.80609	0.0387935	0.132577	3.2616	2.31525	2.31525	3.2616	12	33	5.26506	14.4971	669	64	664	89.84	UNIPROTKB|Q9KL90 - symbol:VC_A0856 "Uncharacterized protein" species:243277 "Vibrio cholerae O1 biovar El Tor str. N16961" [GO:0003674 "molecular_function" evidence=ND] [GO:0005575 "cellular_component" evidence=ND] [GO:0008150 "biological_process" evidence=ND] Proteomes:UP000000584 EMBL:AE003853 PIR:F82408 RefSeq:NP_233242.1 RefSeq:WP_000702730.1 STRING:243277.VCA0856 DNASU:2612845 EnsemblBacteri…	223	18	222	91.93	223	5e-57	111/205	54	150/205	73	5/205	2	1
gene3243	NC_004605.1	19809	20444	+	protein_coding	VPA0022	.	1190701	.	NP_799532.1	hypothetical protein	-2.21939	3.14273	0.0119749	0.0532539	2.63374	3.65527	3.65527	2.63374	35	20	16.1532	9.24202	636				No hit
gene3260	NC_004605.1	33057	33308	+	protein_coding	VPA0039	.	1190718	.	NP_799549.1	hypothetical protein	2.1344	7.41084	1.37761e-06	1.80577e-05	7.85574	6.7687	6.7687	7.85574	326	886	379.722	1033.3	252	1	250	99.21	UNIPROTKB|Q9KKS6 - symbol:VC_A1024 "Uncharacterized protein" species:243277 "Vibrio cholerae O1 biovar El Tor str. N16961" [GO:0003674 "molecular_function" evidence=ND] [GO:0005575 "cellular_component" evidence=ND] [GO:0008150 "biological_process" evidence=ND] Proteomes:UP000000584 EMBL:AE003853 PIR:G82387 STRING:243277.VCA1024 DNASU:2612436 EnsemblBacteria:AAF96920 eggNOG:ENOG410XUWY OMA:MKNELDP…	113	31	113	73.45	151.8	6e-36	66/83	79	79/83	95	0/83	0	1
gene3265	NC_004605.1	36354	36494	-	protein_coding	VPA0044	.	1190723	.	NP_799554.1	hypothetical protein	-3.36307	8.46778	1.91503e-15	7.58083e-14	7.3503	9.09408	9.09408	7.3503	1646	623	3426.57	1298.56	141				No hit
gene3272	NC_004605.1	40956	42221	-	protein_coding	VPA0051	.	1190730	.	NP_799561.1	NhaD	2.95068	7.22457	1.99798e-11	5.43938e-10	7.80122	6.25228	6.25228	7.80122	227	853	52.6309	198.02	1266	1	1264	99.84	UNIPROTKB|H9L4S4 - symbol:VC_A1015 "Na+/H+ antiporter" species:243277 "Vibrio cholerae O1 biovar El Tor str. N16961" [GO:0005215 "transporter activity" evidence=IBA] [GO:0016021 "integral component of membrane" evidence=IBA] [GO:0098656 "anion transmembrane transport" evidence=IBA] InterPro:IPR004680 Pfam:PF03600 GO:GO:0016021 Proteomes:UP000000584 GO:GO:0055085 EMBL:AE003853 eggNOG:COG1055 PIR:D…	477	57	477	88.26	664.5	1e-189	324/421	76	367/421	87	0/421	0	1
gene3277	NC_004605.1	48678	49181	-	protein_coding	VPA0056	.	1190735	.	NP_799566.1	hypothetical protein	2.60428	4.94172	7.66563e-06	8.72813e-05	5.46638	4.13508	4.13508	5.46638	50	166	29.1198	96.7991	504	85	496	81.75	UNIPROTKB|Q9KKX9 - symbol:VC_A0971 "Uncharacterized protein" species:243277 "Vibrio cholerae O1 biovar El Tor str. N16961" [GO:0003674 "molecular_function" evidence=ND] [GO:0005575 "cellular_component" evidence=ND] [GO:0008150 "biological_process" evidence=ND] GO:GO:0016021 Proteomes:UP000000584 EMBL:AE003853 InterPro:IPR021271 Pfam:PF11012 PIR:B82395 RefSeq:NP_233355.1 RefSeq:WP_000032253.1 STRI…	146	8	144	93.84	155.2	1e-36	79/137	57	95/137	69	0/137	0	1
gene3301	NC_004605.1	70611	71246	+	protein_coding	VPA0080	.	1190759	.	NP_799590.1	hypothetical protein	-2.41551	3.28808	0.00481765	0.0248912	2.69302	3.83353	3.83353	2.69302	40	21	18.4608	9.70412	636				No hit
gene3308	NC_004605.1	79174	80946	+	protein_coding	VPA0087	.	1190766	.	NP_799597.1	transporter	2.24305	6.82244	8.36484e-07	1.15342e-05	7.28918	6.13472	6.13472	7.28918	209	597	34.6008	98.96	1773	10	1324	74.17	UNIPROTKB|Q9KZY9 - symbol:SCO4437 "Putative sodium-coupled permease" species:100226 "Streptomyces coelicolor A3(2)" [GO:0005887 "integral component of plasma membrane" evidence=IBA] [GO:0015293 "symporter activity" evidence=IBA] InterPro:IPR001734 Pfam:PF00474 PROSITE:PS50283 GO:GO:0016021 Proteomes:UP000001973 GO:GO:0055085 GO:GO:0005215 EMBL:AL939120 eggNOG:COG0591 OMA:YIAQRMM OrthoDB:POG091H03…	527	5	444	83.49	129.4	2e-28	113/465	24	208/465	44	52/465	11	1
gene3311	NC_004605.1	83209	83793	-	protein_coding	VPA0090	.	1190769	.	NP_799600.1	hypothetical protein	2.11789	5.65611	5.51309e-05	0.00052973	6.09639	5.03629	5.03629	6.09639	96	259	48.1686	130.118	585	1	583	99.66	UNIPROTKB|Q9KRD0 - symbol:VC_1712 "Uncharacterized protein" species:243277 "Vibrio cholerae O1 biovar El Tor str. N16961" [GO:0003674 "molecular_function" evidence=ND] [GO:0008150 "biological_process" evidence=ND] InterPro:IPR001123 Pfam:PF01810 GO:GO:0016021 GO:GO:0005886 GO:GO:0006865 EMBL:AE003852 Proteomes:UP000000584 GO:GO:0015171 PANTHER:PTHR30086 eggNOG:COG1280 eggNOG:ENOG4108VP3 OMA:KAWIM…	204	11	204	95.1	236.1	5e-61	114/194	58	140/194	72	0/194	0	1
gene3319	NC_004605.1	89885	91375	+	protein_coding	VPA0098	.	1190777	.	NP_799608.1	efflux pump protein	2.03629	6.48995	2.21821e-05	0.000230901	6.91271	5.89868	5.89868	6.91271	177	459	34.8453	90.4751	1491	7	1483	99.06	TIGR_CMR|CBU_0797 - symbol:CBU_0797 "drug resistance transporter, EmrB/QacA family" species:227377 "Coxiella burnetii RSA 493" [GO:0006855 "drug transmembrane transport" evidence=ISS] [GO:0042493 "response to drug" evidence=ISS] InterPro:IPR004638 InterPro:IPR011701 Pfam:PF07690 GO:GO:0005887 GO:GO:0022857 CDD:cd06174 InterPro:IPR020846 InterPro:IPR036259 SUPFAM:SSF103473 EMBL:AE016828 Proteomes:…	526	9	500	93.54	335.1	2e-90	175/492	35	276/492	56	0/492	0	1
gene3343	NC_004605.1	114561	115088	-	protein_coding	VPA0122	.	1190801	.	NP_799632.1	hypothetical protein	2.43787	4.01775	0.000576244	0.00416062	4.51517	3.31441	3.31441	4.51517	27	84	15.0099	46.7562	528	1	430	81.44	UNIPROTKB|Q8RH56 - symbol:FN0055 "Ribosomal-protein-alanine acetyltransferase" species:190304 "Fusobacterium nucleatum subsp. nucleatum ATCC 25586" [GO:0004596 "peptide alpha-N-acetyltransferase activity" evidence=IBA] [GO:0006474 "N-terminal protein amino acid acetylation" evidence=IBA] [GO:0031248 "protein acetyltransferase complex" evidence=IBA] InterPro:IPR000182 Pfam:PF00583 PROSITE:PS51186 …	168	4	146	85.12	55.8	9e-07	43/149	28	72/149	48	12/149	8	1
gene3346	NC_004605.1	116207	116938	-	protein_coding	VPA0125	.	1190804	.	NP_799635.1	short chain dehydrogenase/reductase family oxidoreductase	2.39364	3.37033	0.00525818	0.0268168	3.8616	2.72987	2.72987	3.8616	17	52	6.81689	20.8779	732	1	727	99.32	UNIPROTKB|Q9KMN0 - symbol:VC_A0301 "Oxidoreductase, short-chain dehydrogenase/reductase family" species:243277 "Vibrio cholerae O1 biovar El Tor str. N16961" [GO:0016491 "oxidoreductase activity" evidence=ISS] InterPro:IPR002347 GO:GO:0016491 InterPro:IPR036291 SUPFAM:SSF51735 Proteomes:UP000000584 PRINTS:PR00081 PRINTS:PR00080 EMBL:AE003853 OMA:VHCDVAE eggNOG:ENOG4105CYX eggNOG:ENOG410XNUN PIR:E…	250	3	249	98.8	285.8	7e-76	141/247	57	184/247	74	5/247	2	1
gene3353	NC_004605.1	123765	124427	-	protein_coding	VPA0132	.	1190811	.	NP_799642.1	transcriptional activator	10.1381	2.71261	1.50761e-06	1.9701e-05	3.51256	0.995829	0.995829	3.51256	3	40	1.32818	17.7313	663	25	652	94.72	UNIPROTKB|Q5LWK6 - symbol:SPO0051 "TENA/THI-4 family protein" species:246200 "Ruegeria pomeroyi DSS-3" [GO:0003674 "molecular_function" evidence=ND] [GO:0008150 "biological_process" evidence=ND] InterPro:IPR027574 UniPathway:UPA00060 InterPro:IPR016084 EMBL:CP000031 Proteomes:UP000001023 GO:GO:0009228 Gene3D:1.20.910.10 SUPFAM:SSF48613 GO:GO:0009229 InterPro:IPR004305 Pfam:PF03070 GO:GO:0050334 e…	214	4	212	97.66	163.3	5e-39	89/214	41	129/214	60	10/214	4	1
gene3355	NC_004605.1	125419	126219	-	protein_coding	VPA0134	.	1190813	.	NP_799644.1	ABC transporter permease	2.77119	2.67671	0.0126641	0.0559673	3.2219	1.99374	1.99374	3.2219	9	32	3.29806	11.7412	801	70	784	89.26	UNIPROTKB|Q57306 - symbol:HI_0355 "Probable ABC transporter permease protein HI_0355" species:71421 "Haemophilus influenzae Rd KW20" [GO:0005215 "transporter activity" evidence=IBA] [GO:0005886 "plasma membrane" evidence=IBA] InterPro:IPR000515 Pfam:PF00528 PROSITE:PS50928 GO:GO:0016021 GO:GO:0005886 EMBL:L42023 Proteomes:UP000000579 GO:GO:0006810 GO:GO:0005215 CDD:cd06261 Gene3D:1.10.3720.10 Int…	245	5	242	97.14	254.2	2e-66	129/238	54	167/238	70	0/238	0	1
gene3377	NC_004605.1	143183	143848	+	protein_coding	VPA0148	.	1190835	.	NP_799658.1	transcriptional regulator CpxR	-2.41493	4.49843	8.34791e-05	0.000760806	3.80899	5.02165	5.02165	3.80899	95	50	41.8695	22.0643	666	1	640	96.1	UNIPROTKB|Q9KNN9 - symbol:VC_2692 "Transcriptional regulator CpxR" species:243277 "Vibrio cholerae O1 biovar El Tor str. N16961" [GO:0003700 "DNA binding transcription factor activity" evidence=ISS] [GO:0006355 "regulation of transcription, DNA-templated" evidence=ISS] InterPro:IPR001789 InterPro:IPR001867 InterPro:IPR016032 Pfam:PF00072 Pfam:PF00486 PROSITE:PS50110 PROSITE:PS51755 SMART:SM00448 …	228	1	222	97.37	172.9	6e-42	98/223	43	137/223	61	11/223	4	1
gene3378	NC_004605.1	143845	145221	+	protein_coding	VPA0149	.	1190836	.	NP_799659.1	two-component system sensor kinase	-2.01845	5.36642	0.00022219	0.00181819	4.81111	5.79915	5.79915	4.81111	165	104	35.1721	22.197	1377	481	1357	63.69	UNIPROTKB|Q484N5 - symbol:cpxA "Sensor protein CpxA" species:167879 "Colwellia psychrerythraea 34H" [GO:0000155 "phosphorelay sensor kinase activity" evidence=ISM] [GO:0000160 "phosphorelay signal transduction system" evidence=ISM] InterPro:IPR003660 InterPro:IPR003661 InterPro:IPR004358 InterPro:IPR036097 Pfam:PF00512 Pfam:PF00672 PRINTS:PR00344 PROSITE:PS50885 SMART:SM00304 SMART:SM00388 InterP…	472	169	457	61.23	146	2e-33	88/294	29	154/294	52	7/294	2	1
gene3379	NC_004605.1	145430	147523	+	protein_coding	VPA0150	.	1190837	.	NP_799660.1	ferrichrome-iron receptor	-17.8161	9.63256	3.64514e-66	5.1603e-63	6.41519	10.5548	10.5548	6.41519	4536	324	635.835	45.4739	2094	13	2092	99.33	UNIPROTKB|Q47UC5 - symbol:CPS_4959 "TonB-dependent receptor" species:167879 "Colwellia psychrerythraea 34H" [GO:0005215 "transporter activity" evidence=ISM] [GO:0006810 "transport" evidence=ISM] InterPro:IPR010105 InterPro:IPR000531 InterPro:IPR012910 Pfam:PF00593 Pfam:PF07715 GO:GO:0005506 GO:GO:0009279 GO:GO:0004872 EMBL:CP000083 Proteomes:UP000000547 Gene3D:2.170.130.10 Gene3D:2.40.170.20 Inte…	706	4	706	99.58	568.5	2e-160	313/713	43	429/713	60	30/713	4	1
gene3380	NC_004605.1	147607	148365	+	protein_coding	VPA0151	.	1190838	.	NP_799661.1	hypothetical protein	-8.52943	7.04065	1.35814e-33	1.69648e-31	4.83762	7.8865	7.8865	4.83762	711	106	274.964	41.0448	759	1	757	99.74	UNIPROTKB|Q9ZHW2 - symbol:ERS013140_01894 "TonB system biopolymer transport component" species:666 "Vibrio cholerae" [GO:0003674 "molecular_function" evidence=ND] [GO:0005575 "cellular_component" evidence=ND] [GO:0008150 "biological_process" evidence=ND] EMBL:AF047974 EMBL:CP024162 Proteomes:UP000040416 Proteomes:UP000043247 Proteomes:UP000045183 Proteomes:UP000045578 Proteomes:UP000192124 Proteo…	252	1	252	100	267.3	3e-70	136/252	53	177/252	70	0/252	0	1
gene3381	NC_004605.1	148366	149733	+	protein_coding	VPA0152	.	1190839	.	NP_799662.1	biopolymer transport protein ExbB-like protein	-5.40503	7.53344	8.35578e-25	6.09292e-23	5.87751	8.29241	8.29241	5.87751	943	222	202.336	47.6937	1368	4	1318	96.13	UNIPROTKB|Q9KRT8 - symbol:VC_1547 "Biopolymer transport protein ExbB-related protein" species:243277 "Vibrio cholerae O1 biovar El Tor str. N16961" [GO:0015078 "proton transmembrane transporter activity" evidence=ISS] [GO:0016020 "membrane" evidence=ISS] Pfam:PF01618 GO:GO:0016020 GO:GO:0005887 GO:GO:0008565 EMBL:AE003852 Proteomes:UP000000584 GO:GO:0015992 GO:GO:0017038 GO:GO:0015078 eggNOG:COG0…	457	3	443	96.5	525	1e-147	275/441	62	343/441	77	3/441	0	1
gene3382	NC_004605.1	149733	150287	+	protein_coding	VPA0153	.	1190840	.	NP_799663.1	TonB system transport protein ExbB2	-6.49551	6.49105	7.0685e-25	5.26666e-23	4.64092	7.29243	7.29243	4.64092	470	92	248.573	48.7179	555	43	550	91.53	UNIPROTKB|Q9KRT9 - symbol:VC_1546 "TonB system transport protein ExbB2" species:243277 "Vibrio cholerae O1 biovar El Tor str. N16961" [GO:0005215 "transporter activity" evidence=ISS] [GO:0006810 "transport" evidence=ISS] Pfam:PF01618 GO:GO:0005887 GO:GO:0008565 EMBL:AE003852 Proteomes:UP000000584 GO:GO:0006810 GO:GO:0005215 GO:GO:0017038 eggNOG:COG0811 KO:K03561 InterPro:IPR002898 PIR:F82187 RefS…	180	11	179	93.89	231.9	9e-60	112/169	66	136/169	80	0/169	0	1
gene3383	NC_004605.1	150284	150688	+	protein_coding	VPA0154	.	1190841	.	NP_799664.1	TonB system transport protein ExbD2	-7.10283	6.01208	6.86546e-24	4.6437e-22	4.07718	6.83302	6.83302	4.07718	341	61	247.143	44.2658	405	1	403	99.51	UNIPROTKB|Q9ZHV9 - symbol:exbD2 "Biopolymer transport protein exbD2" species:243277 "Vibrio cholerae O1 biovar El Tor str. N16961" [GO:0005215 "transporter activity" evidence=ISS] [GO:0006810 "transport" evidence=ISS] InterPro:IPR003400 Pfam:PF02472 GO:GO:0016021 GO:GO:0005886 GO:GO:0015031 EMBL:AE003852 Proteomes:UP000000584 GO:GO:0006810 GO:GO:0005215 eggNOG:COG0848 PANTHER:PTHR30558 EMBL:AF047…	134	1	134	100	226.5	3e-58	114/134	85	129/134	96	0/134	0	1
gene3384	NC_004605.1	150688	151308	+	protein_coding	VPA0155	.	1190842	.	NP_799665.1	TonB2 protein	-5.65622	6.62884	1.24318e-22	7.23261e-21	4.93904	7.40109	7.40109	4.93904	507	114	239.643	53.952	621	1	619	99.68	UNIPROTKB|Q9KRU0 - symbol:VC_1544 "Protein TonB" species:243277 "Vibrio cholerae O1 biovar El Tor str. N16961" [GO:0003674 "molecular_function" evidence=ND] [GO:0006810 "transport" evidence=ISS] InterPro:IPR003538 InterPro:IPR006260 PRINTS:PR01374 GO:GO:0016021 GO:GO:0005886 GO:GO:0015031 EMBL:AE003852 Proteomes:UP000000584 GO:GO:0006810 GO:GO:0030288 GO:GO:0015343 GO:GO:0031992 eggNOG:COG0810 KO…	206	1	206	100	199.5	6e-50	108/206	52	140/206	67	0/206	0	1
gene3385	NC_004605.1	151305	152477	+	protein_coding	VPA0156	.	1190843	.	NP_799666.1	hypothetical protein	-5.10007	7.67416	8.70501e-24	5.77659e-22	6.08537	8.41933	8.41933	6.08537	1030	257	257.743	64.3916	1173	1	1171	99.83	UNIPROTKB|Q9KRU1 - symbol:VC_1543 "Uncharacterized protein" species:243277 "Vibrio cholerae O1 biovar El Tor str. N16961" [GO:0003674 "molecular_function" evidence=ND] [GO:0005575 "cellular_component" evidence=ND] [GO:0008150 "biological_process" evidence=ND] InterPro:IPR011990 EMBL:AE003852 Proteomes:UP000000584 Gene3D:1.25.40.10 SUPFAM:SSF48452 eggNOG:COG0457 PIR:C82187 RefSeq:NP_231183.1 RefSe…	392	1	392	100	446.4	5e-124	213/392	54	296/392	75	2/392	0	1
gene3412	NC_004605.1	180581	181936	+	protein_coding	VPA0183	.	1190870	.	NP_799693.1	C4-dicarboxylate transport transcriptional regulatory protein	4.77592	7.1081	2.29246e-20	1.15906e-18	7.82957	5.59668	5.59668	7.82957	143	870	30.9546	188.562	1356	25	1348	97.64	UNIPROTKB|Q9KN24 - symbol:VC_A0142 "C4-dicarboxylate transport transcriptional regulatory protein" species:243277 "Vibrio cholerae O1 biovar El Tor str. N16961" [GO:0000156 "phosphorelay response regulator activity" evidence=ISS] [GO:0000160 "phosphorelay signal transduction system" evidence=ISS] [GO:0015740 "C4-dicarboxylate transport" evidence=ISS] InterPro:IPR001789 InterPro:IPR002078 InterPro…	450	6	446	98	617.1	2e-175	315/441	71	362/441	82	0/441	0	1
gene3422	NC_004605.1	192335	192946	-	protein_coding	VPA0193	.	1190880	.	NP_799703.1	hypothetical protein	-2.03891	6.20845	3.21783e-05	0.000323841	5.62699	6.64039	6.64039	5.62699	298	186	142.927	89.3214	612				No hit
gene3425	NC_004605.1	193626	194834	+	protein_coding	VPA0195	.	1190883	.	NP_799705.1	NupC family protein	-2.62101	3.90688	0.00027273	0.00215294	3.18107	4.47315	4.47315	3.18107	64	31	15.5382	7.5358	1209	1	1207	99.83	UNIPROTKB|Q9KMY7 - symbol:VC_A0179 "Nucleoside permease" species:243277 "Vibrio cholerae O1 biovar El Tor str. N16961" [GO:0005337 "nucleoside transmembrane transporter activity" evidence=ISS;IBA] [GO:0005887 "integral component of plasma membrane" evidence=IBA] [GO:0015858 "nucleoside transport" evidence=ISS] InterPro:IPR008276 InterPro:IPR018270 InterPro:IPR002668 Pfam:PF01773 Pfam:PF07670 GO:G…	402	1	402	100	673.3	3e-192	341/402	84	379/402	94	0/402	0	1
gene3431	NC_004605.1	202416	203000	+	protein_coding	VPA0201	.	1190889	.	NP_799711.1	malate synthase	-2.12212	8.54143	4.51096e-07	6.42887e-06	7.90358	8.98602	8.98602	7.90358	1527	916	766.181	460.186	585	4	577	98.12	UNIPROTKB|Q9KKZ3 - symbol:VC_A0957 "Malate synthase-related protein" species:243277 "Vibrio cholerae O1 biovar El Tor str. N16961" [GO:0003674 "molecular_function" evidence=ND] [GO:0005575 "cellular_component" evidence=ND] [GO:0008150 "biological_process" evidence=ND] InterPro:IPR011076 GO:GO:0003824 Proteomes:UP000000584 EMBL:AE003853 eggNOG:COG2225 SUPFAM:SSF51645 KO:K01638 PIR:E82396 RefSeq:NP…	202	10	201	95.05	260	3e-68	123/192	64	150/192	78	1/192	0	1
gene3435	NC_004605.1	207342	208049	+	protein_coding	VPA0205	.	1190893	.	NP_799715.1	C factor cell-cell signaling protein	9.2986	1.3611	0.00444385	0.0233	2.13229	0.412954	0.412954	2.13229	1	13	0.414586	5.3964	708	1	706	99.72	UNIPROTKB|Q9KR32 - symbol:VC_1815 "C-factor, putative" species:243277 "Vibrio cholerae O1 biovar El Tor str. N16961" [GO:0007267 "cell-cell signaling" evidence=ISS] Pfam:PF00106 InterPro:IPR002347 InterPro:IPR036291 SUPFAM:SSF51735 EMBL:AE003852 Proteomes:UP000000584 GO:GO:0007267 eggNOG:COG1028 PRINTS:PR00081 OMA:TGGWYSY PIR:C82155 RefSeq:NP_231449.1 RefSeq:WP_001028258.1 ProteinModelPortal:Q9KR…	235	1	235	100	315.1	1e-84	151/235	64	181/235	77	0/235	0	1
gene3449	NC_004605.1	221020	221454	-	protein_coding	VPA0219	.	1190907	.	NP_799729.1	hypothetical protein	2.11927	5.39826	0.000105413	0.000932681	5.83866	4.78203	4.78203	5.83866	80	216	53.982	145.935	435				No hit
gene3466	NC_004605.1	241026	242036	+	protein_coding	VPA0236	.	1190924	.	NP_799746.1	ABC transporter periplasmic substrate-binding protein	-5.16011	4.55643	6.12964e-12	1.74715e-10	3.09579	5.32576	5.32576	3.09579	118	29	34.2593	8.43026	1011	1	1009	99.8	UNIPROTKB|Q9KLY8 - symbol:VC_A0603 "ABC transporter, periplasmic substrate-binding protein" species:243277 "Vibrio cholerae O1 biovar El Tor str. N16961" [GO:0006810 "transport" evidence=ISS] [GO:0042626 "ATPase activity, coupled to transmembrane movement of substances" evidence=ISS] Proteomes:UP000000584 GO:GO:0006810 GO:GO:0042626 EMBL:AE003853 KO:K02012 InterPro:IPR026045 PIRSF:PIRSF002825 egg…	339	4	339	99.12	563.1	3e-159	270/336	80	298/336	88	0/336	0	1
gene3482	NC_004605.1	256295	256531	+	protein_coding	VPA0252	.	1190940	.	NP_799762.1	hypothetical protein	4.01813	2.31116	0.00429585	0.0228056	2.95759	1.40982	1.40982	2.95759	5	26	6.19256	32.2418	237				No hit
gene3494	NC_004605.1	265846	266208	+	protein_coding	VPA0264	.	1190952	flgB	NP_799774.1	flagellar basal-body rod protein FlgB	-2.17335	4.01006	0.00230502	0.0133735	3.4452	4.49452	4.49452	3.4452	65	38	52.56	30.766	363	1	361	99.45	UNIPROTKB|Q7CGK5 - symbol:lfgB "Flagellar basal body rod protein FlgB" species:632 "Yersinia pestis" [GO:0009424 "bacterial-type flagellum hook" evidence=IBA] [GO:0071978 "bacterial-type flagellum-dependent swarming motility" evidence=IBA] InterPro:IPR001444 InterPro:IPR006300 Pfam:PF00460 PIRSF:PIRSF002889 Prosite:PS00588 EMBL:AL590842 Proteomes:UP000000815 GO:GO:0071978 eggNOG:COG1815 KO:K02387…	148	1	148	100	109	6e-23	62/148	41	84/148	56	28/148	18	1
gene3501	NC_004605.1	270795	271931	+	protein_coding	VPA0271	.	1190959		NP_799781.1	hypothetical protein	2.66944	3.82849	0.000464327	0.00348409	4.35922	3.05155	3.05155	4.35922	22	75	5.6795	19.3863	1137	40	1135	96.39	UNIPROTKB|Q4KG91 - symbol:flgI "Flagellar P-ring protein" species:220664 "Pseudomonas protegens Pf-5" [GO:0005198 "structural molecule activity" evidence=ISM] [GO:0009428 "bacterial-type flagellum basal body, distal rod, P ring" evidence=ISM] HAMAP:MF_00416 InterPro:IPR001782 Pfam:PF02119 PRINTS:PR01010 EMBL:CP000076 Proteomes:UP000008540 GO:GO:0030288 GO:GO:0005198 GO:GO:0071973 eggNOG:ENOG4105D…	369	10	369	97.56	332.8	8e-90	179/367	48	249/367	67	9/367	2	1
gene3502	NC_004605.1	271942	272481	+	protein_coding	VPA0272	.	1190960	.	NP_799782.1	hypothetical protein	2.91918	2.57721	0.00778622	0.0373651	3.13906	1.8684	1.8684	3.13906	8	30	4.34855	16.3276	540	37	523	90.19	UNIPROTKB|Q8ECA3 - symbol:flgJ "Flagellar rod cap protein and peptidoglycan hydrolase FlgJ" species:211586 "Shewanella oneidensis MR-1" [GO:0003824 "catalytic activity" evidence=ISS] [GO:0030288 "outer membrane-bounded periplasmic space" evidence=ISS] InterPro:IPR002901 InterPro:IPR013377 Pfam:PF01832 SMART:SM00047 GO:GO:0003824 GO:GO:0008152 EMBL:AE014299 Proteomes:UP000008186 GO:GO:0004040 GO:G…	384	6	161	40.63	69.7	6e-11	49/164	29	87/164	53	10/164	6	1
gene3524	NC_004605.1	292928	294370	-	protein_coding	VPA0294	.	1190982	.	NP_799804.1	hypothetical protein	2.01721	5.45306	0.000224403	0.00182925	5.8711	4.8827	4.8827	5.8711	86	221	17.4936	45.0111	1443	16	1099	75.12	UNIPROTKB|Q9KNB3 - symbol:VC_A0052 "Uncharacterized protein" species:243277 "Vibrio cholerae O1 biovar El Tor str. N16961" [GO:0003674 "molecular_function" evidence=ND] [GO:0005575 "cellular_component" evidence=ND] [GO:0008150 "biological_process" evidence=ND] Proteomes:UP000000584 Gene3D:1.10.10.10 InterPro:IPR036388 EMBL:AE003853 PIR:B82505 STRING:243277.VCA0052 DNASU:2612167 EnsemblBacteria:AA…	520	45	418	71.92	62.8	2e-08	93/401	23	157/401	39	67/401	16	1
gene3525	NC_004605.1	294404	295969	-	protein_coding	VPA0295	.	1190983	.	NP_799805.1	hypothetical protein	2.81775	3.75388	0.000187747	0.00156653	4.30325	2.93134	2.93134	4.30325	20	72	3.74875	13.5125	1566	34	1555	97.19	UNIPROTKB|K7GSR6 - symbol:NT5E "Uncharacterized protein" species:9823 "Sus scrofa" [GO:0000166 "nucleotide binding" evidence=IEA] [GO:0005737 "cytoplasm" evidence=IEA] [GO:0005886 "plasma membrane" evidence=IEA] [GO:0006196 "AMP catabolic process" evidence=IEA] [GO:0007159 "leukocyte cell-cell adhesion" evidence=IEA] [GO:0008253 "5'-nucleotidase activity" evidence=IEA] [GO:0009986 "cell surface" …	574	10	549	94.08	169.5	2e-40	156/563	27	251/563	44	79/563	14	1
gene3535	NC_004605.1	304869	306410	+	protein_coding	VPA0305	.	1190993	.	NP_799815.1	catalase	2.39046	5.98261	1.16932e-06	1.54227e-05	6.47552	5.23979	5.23979	6.47552	111	338	21.1294	64.4208	1542	28	1540	98.12	UNIPROTKB|Q9KRQ1 - symbol:VC_1585 "Catalase" species:243277 "Vibrio cholerae O1 biovar El Tor str. N16961" [GO:0004096 "catalase activity" evidence=IBA] [GO:0005737 "cytoplasm" evidence=IBA] [GO:0020037 "heme binding" evidence=IBA] [GO:0042542 "response to hydrogen peroxide" evidence=IBA] [GO:0042744 "hydrogen peroxide catabolic process" evidence=IBA] InterPro:IPR002226 InterPro:IPR011614 InterPr…	503	1	503	100	879.8	2e-254	423/504	83	470/504	93	1/504	0	1
gene3536	NC_004605.1	306512	306979	+	protein_coding	VPA0306	.	1190994	.	NP_799816.1	AnkB protein	4.80159	3.74987	2.79526e-07	4.20973e-06	4.44793	2.40825	2.40825	4.44793	13	80	8.15353	50.2387	468	10	220	45.09	UNIPROTKB|Q9KRQ2 - symbol:VC_1584 "AnkB protein" species:243277 "Vibrio cholerae O1 biovar El Tor str. N16961" [GO:0008150 "biological_process" evidence=ND] InterPro:IPR002110 PROSITE:PS50088 SMART:SM00248 EMBL:AE003852 Proteomes:UP000000584 GO:GO:0005622 eggNOG:COG0666 CDD:cd00204 Gene3D:1.25.40.20 InterPro:IPR020683 InterPro:IPR036770 Pfam:PF12796 SUPFAM:SSF48403 PROSITE:PS50297 KO:K06867 PIR:B…	188	23	92	37.23	68.6	1e-10	36/70	51	46/70	65	0/70	0	1
gene3563	NC_004605.1	326797	328005	-	protein_coding	VPA0333	.	1191021	.	NP_799843.1	hypothetical protein	4.47349	4.11199	4.45826e-08	7.69684e-07	4.79767	2.8002	2.8002	4.79767	18	103	4.37013	25.0383	1209	25	1144	92.64	UNIPROTKB|Q81QY7 - symbol:GBAA_2277 "MFS transporter" species:1392 "Bacillus anthracis" [GO:0006810 "transport" evidence=ISS] InterPro:IPR011701 Pfam:PF07690 GO:GO:0016021 EMBL:AE017334 Proteomes:UP000000594 GO:GO:0006810 GO:GO:0055085 CDD:cd06174 InterPro:IPR020846 InterPro:IPR036259 SUPFAM:SSF103473 RefSeq:WP_001275519.1 STRING:260799.BAS2123 DNASU:1089232 EnsemblBacteria:AAT31402 EnsemblBacter…	409	14	388	91.69	128.6	2e-28	97/386	25	187/386	48	24/386	6	1
gene3575	NC_004605.1	338323	338589	+	protein_coding	VPA0345	.	1191033	.	NP_799855.1	hypothetical protein	-4.85632	5.68104	3.68189e-16	1.50355e-14	4.20486	6.42359	6.42359	4.20486	256	67	281.434	73.7492	267				No hit
gene3576	NC_004605.1	338584	338907	-	protein_coding	VPA0346	.	1191034	.	NP_799856.1	hypothetical protein	-3.49481	1.77688	0.0250426	0.095989	1.20263	2.49562	2.49562	1.20263	14	5	12.6833	4.53543	324				No hit
gene3585	NC_004605.1	346936	347664	+	protein_coding	VPA0355	.	1191043	.	NP_799865.1	transcriptional regulator	-2.16806	3.37022	0.0101916	0.0465697	2.8575	3.86669	3.86669	2.8575	41	24	16.5084	9.67559	729	46	727	93.55	UNIPROTKB|Q48L82 - symbol:PSPPH_1595 "Transcriptional regulator, GntR family" species:264730 "Pseudomonas savastanoi pv. phaseolicola 1448A" [GO:0003700 "DNA binding transcription factor activity" evidence=ISM] [GO:0006355 "regulation of transcription, DNA-templated" evidence=ISM] InterPro:IPR000524 InterPro:IPR011663 Pfam:PF00392 Pfam:PF07702 PRINTS:PR00035 PROSITE:PS50949 SMART:SM00345 SMART:SM…	240	12	238	94.58	213	6e-54	107/227	47	155/227	68	0/227	0	1
gene3591	NC_004605.1	355004	355258	-	protein_coding	VPA0361	.	1191049	.	NP_799871.1	hypothetical protein	-2.14832	4.13952	0.00212081	0.0123997	3.57692	4.61648	4.61648	3.57692	71	42	81.7272	48.4064	255				No hit
gene3594	NC_004605.1	360015	361136	-	protein_coding	VPA0364	.	1191052	.	NP_799874.1	efflux protein	2.02753	3.93701	0.00640699	0.0316033	4.35922	3.40747	3.40747	4.35922	29	75	7.58671	19.6455	1122	64	1087	91.27	UNIPROTKB|Q89SH8 - symbol:blr2422 "Blr2422 protein" species:224911 "Bradyrhizobium diazoefficiens USDA 110" [GO:0006855 "drug transmembrane transport" evidence=IBA] [GO:0015238 "drug transmembrane transporter activity" evidence=IBA] [GO:0031226 "intrinsic component of plasma membrane" evidence=IBA] [GO:0046677 "response to antibiotic" evidence=IBA] InterPro:IPR006143 EMBL:BA000040 Proteomes:UP000…	368	18	357	92.39	110.9	5e-23	80/342	23	142/342	41	3/342	0	1
gene3600	NC_004605.1	366206	366985	-	protein_coding	VPA0371	.	1191058	.	NP_799880.1	hypothetical protein	2.22063	6.1772	4.95348e-06	5.82754e-05	6.63894	5.5049	5.5049	6.63894	134	379	50.4265	142.803	780	301	772	60.51	UNIPROTKB|Q607C2 - symbol:MCA1839 "Putative lipoprotein" species:243233 "Methylococcus capsulatus str. Bath" [GO:0003674 "molecular_function" evidence=ND] [GO:0008150 "biological_process" evidence=ND] EMBL:AE017282 Proteomes:UP000006821 InterPro:IPR007461 Pfam:PF04366 RefSeq:WP_010961091.1 STRING:243233.MCA1839 EnsemblBacteria:AAU91939 KEGG:mca:MCA1839 eggNOG:ENOG4105S6C eggNOG:ENOG4111XQS OMA:SA…	193	32	193	83.94	102.8	9e-21	55/162	33	85/162	52	5/162	3	1
gene3628	NC_004605.1	395795	395902	-	protein_coding	VPA0398	.	1191086	.	NP_799908.1	hypothetical protein	-4.37704	2.22113	0.00182283	0.0109809	1.35721	2.99269	2.99269	1.35721	21	6	57.0747	16.3276	108				No hit
gene3648	NC_004605.1	412475	412747	+	protein_coding	VPA0418	.	1191106	.	NP_799928.1	hypothetical protein	2.67412	6.30086	1.46585e-08	2.75462e-07	6.83918	5.4403	5.4403	6.83918	128	436	137.624	469.373	273	28	259	84.98	UNIPROTKB|Q9KR98 - symbol:VC_1744 "Uncharacterized protein" species:243277 "Vibrio cholerae O1 biovar El Tor str. N16961" [GO:0003674 "molecular_function" evidence=ND] [GO:0005575 "cellular_component" evidence=ND] [GO:0008150 "biological_process" evidence=ND] EMBL:AE003852 Proteomes:UP000000584 PIR:D82161 RefSeq:NP_231380.1 RefSeq:WP_001259524.1 STRING:243277.VC1744 DNASU:2613749 EnsemblBacteria:…	93	3	78	81.72	72	6e-12	37/77	48	49/77	63	1/77	1	1
gene3651	NC_004605.1	414221	415003	-	protein_coding	VPA0421	.	1191109	hmuV	NP_799931.2	hemin importer ATP-binding subunit	-3.01496	4.75391	3.93391e-07	5.74134e-06	3.83553	5.36108	5.36108	3.83553	121	51	45.3599	19.1427	783	1	778	99.36	UNIPROTKB|Q9KL34 - symbol:hmuV "Hemin import ATP-binding protein HmuV" species:243277 "Vibrio cholerae O1 biovar El Tor str. N16961" [GO:0006826 "iron ion transport" evidence=ISS] [GO:0042626 "ATPase activity, coupled to transmembrane movement of substances" evidence=ISS] InterPro:IPR003439 InterPro:IPR015863 Pfam:PF00005 PROSITE:PS50893 PROSITE:PS51261 InterPro:IPR003593 InterPro:IPR027417 SUPFA…	259	1	259	100	364.8	1e-99	176/259	67	209/259	80	0/259	0	1
gene3653	NC_004605.1	416050	416919	-	protein_coding	VPA0423	.	1191111	.	NP_799933.1	hemin ABC transporter periplasmic hemin-binding protein HutB	-3.76058	6.16009	1.2147e-13	4.12707e-12	4.95123	6.82882	6.82882	4.95123	340	115	114.712	38.8483	870	46	868	94.6	UNIPROTKB|Q9KL36 - symbol:VC_A0913 "Hemin ABC transporter, periplasmic hemin-binding protein HutB" species:243277 "Vibrio cholerae O1 biovar El Tor str. N16961" [GO:0006810 "transport" evidence=IBA] [GO:0006826 "iron ion transport" evidence=ISS] [GO:0030288 "outer membrane-bounded periplasmic space" evidence=IBA] [GO:0036094 "small molecule binding" evidence=IBA] [GO:0042626 "ATPase activity, cou…	277	8	277	97.47	330.9	2e-89	173/274	63	208/274	75	4/274	1	1
gene3654	NC_004605.1	416947	417360	-	protein_coding	VPA0424	.	1191112	.	NP_799934.1	TonB system transport protein ExbD1	-57.7708	4.0368	7.0939e-23	4.18441e-21	0.604672	5.05079	5.05079	0.604672	97	2	68.7733	1.41979	414	1	409	98.79	UNIPROTKB|O52044 - symbol:exbD1 "Biopolymer transport protein exbD1" species:243277 "Vibrio cholerae O1 biovar El Tor str. N16961" [GO:0005215 "transporter activity" evidence=ISS] [GO:0006810 "transport" evidence=ISS] InterPro:IPR003400 Pfam:PF02472 GO:GO:0016021 GO:GO:0005886 GO:GO:0015031 Proteomes:UP000000584 GO:GO:0006810 GO:GO:0005215 EMBL:AE003853 EMBL:AF016580 PIR:D82400 RefSeq:NP_233297.1…	138	1	136	98.55	181.8	8e-45	92/136	67	112/136	82	0/136	0	1
gene3655	NC_004605.1	417357	418049	-	protein_coding	VPA0425	.	1191113	.	NP_799935.1	ExbB-like protein	-11.487	5.91567	1.49543e-31	1.51216e-29	3.4103	6.80764	6.80764	3.4103	335	37	141.893	15.6914	693	1	655	94.52	UNIPROTKB|O52043 - symbol:exbB1 "Biopolymer transport protein exbB1" species:243277 "Vibrio cholerae O1 biovar El Tor str. N16961" [GO:0005215 "transporter activity" evidence=ISS] [GO:0006810 "transport" evidence=ISS] Pfam:PF01618 GO:GO:0005887 GO:GO:0008565 Proteomes:UP000000584 GO:GO:0006810 GO:GO:0005215 EMBL:AE003853 GO:GO:0017038 EMBL:AF016580 PIR:C82400 RefSeq:NP_233296.1 RefSeq:WP_00044508…	228	1	224	98.25	292	9e-78	156/224	69	184/224	82	6/224	2	1
gene3656	NC_004605.1	418049	418792	-	protein_coding	VPA0426	.	1191114	.	NP_799936.1	TonB-like protein	-4.51784	6.24104	5.22944e-17	2.26627e-15	4.82442	6.96134	6.96134	4.82442	373	105	147.158	41.4773	744	1	742	99.73	UNIPROTKB|O52042 - symbol:tonB "Protein TonB" species:243277 "Vibrio cholerae O1 biovar El Tor str. N16961" [GO:0003674 "molecular_function" evidence=ND] [GO:0006810 "transport" evidence=ISS] InterPro:IPR003538 InterPro:IPR006260 PRINTS:PR01374 GO:GO:0016021 GO:GO:0005886 GO:GO:0071281 GO:GO:0015031 Proteomes:UP000000584 GO:GO:0006810 EMBL:AE003853 GO:GO:0030288 GO:GO:0015343 EMBL:AF016580 GO:GO:…	244	1	244	100	124	4e-27	158/247	63	174/247	70	3/247	1	1
gene3657	NC_004605.1	418955	420325	+	protein_coding	VPA0427	.	1191115	.	NP_799937.1	coproporphyrinogen III oxidase	-9.65519	6.64457	7.00765e-34	9.01863e-32	4.30325	7.51002	7.51002	4.30325	547	72	117.111	15.4344	1371	13	1327	95.92	UNIPROTKB|Q9KL39 - symbol:VC_A0909 "Oxygen-independent coproporphyrinogen III oxidase, putative" species:243277 "Vibrio cholerae O1 biovar El Tor str. N16961" [GO:0003674 "molecular_function" evidence=ND] [GO:0008150 "biological_process" evidence=ND] InterPro:IPR006638 InterPro:IPR007197 InterPro:IPR013785 Pfam:PF04055 SMART:SM00729 GO:GO:0003824 Gene3D:3.20.20.70 Proteomes:UP000000584 GO:GO:0051…	455	6	443	96.26	652.9	4e-186	305/438	69	365/438	83	0/438	0	1
gene3658	NC_004605.1	420347	420862	+	protein_coding	VPA0428	.	1191116	.	NP_799938.1	hypothetical protein	-3.99314	6.93561	9.80231e-17	4.16304e-15	5.64211	7.61862	7.61862	5.64211	590	188	335.622	107.078	516	1	514	99.61	UNIPROTKB|Q9KL40 - symbol:VC_A0908 "Uncharacterized protein" species:243277 "Vibrio cholerae O1 biovar El Tor str. N16961" [GO:0003674 "molecular_function" evidence=ND] [GO:0008150 "biological_process" evidence=ND] Proteomes:UP000000584 EMBL:AE003853 PIR:B82403 PDB:5EXV PDBsum:5EXV ProteinModelPortal:Q9KL40 SMR:Q9KL40 STRING:243277.VCA0908 DNASU:2612247 EnsemblBacteria:AAF96805 eggNOG:ENOG41090JE…	193	23	193	88.6	253.4	3e-66	125/171	73	144/171	84	0/171	0	1
gene3659	NC_004605.1	420981	421511	+	protein_coding	VPA0429	.	1191117	.	NP_799939.1	hypothetical protein	-3.27715	6.04373	3.86371e-11	1.0067e-09	4.9872	6.66886	6.66886	4.9872	304	118	168.046	65.3103	531	1	526	99.06	UNIPROTKB|Q9KL41 - symbol:VC_A0907 "Uncharacterized protein" species:243277 "Vibrio cholerae O1 biovar El Tor str. N16961" [GO:0015886 "heme transport" evidence=ISS] [GO:0020037 "heme binding" evidence=ISS] InterPro:IPR012349 InterPro:IPR011576 Pfam:PF01243 GO:GO:0071281 Proteomes:UP000000584 GO:GO:0020037 GO:GO:0015886 GO:GO:0048037 EMBL:AE003853 Gene3D:2.30.110.10 SUPFAM:SSF50475 eggNOG:COG0748…	176	1	175	99.43	288.9	6e-77	141/175	80	160/175	91	0/175	0	1
gene3680	NC_004605.1	443196	444689	-	protein_coding	VPA0450	.	1191138	.	NP_799960.1	hypothetical protein	2.76767	4.38152	2.22822e-05	0.000231375	4.92675	3.53669	3.53669	4.92675	32	113	6.28706	22.2291	1494				No hit
gene3700	NC_004605.1	467580	468722	+	protein_coding	VPA0470	.	1191158	.	NP_799980.1	multidrug efflux system transmembrane protein	2.24313	3.65575	0.00433438	0.0228672	4.12101	3.05155	3.05155	4.12101	22	63	5.64969	16.199	1143	25	1099	94.05	UNIPROTKB|Q8EBL8 - symbol:mexE "HAE1 family efflux pump MFP component MexE" species:211586 "Shewanella oneidensis MR-1" [GO:0006855 "drug transmembrane transport" evidence=IBA] [GO:0015238 "drug transmembrane transporter activity" evidence=IBA] [GO:0031226 "intrinsic component of plasma membrane" evidence=IBA] [GO:0046677 "response to antibiotic" evidence=IBA] InterPro:IPR006143 EMBL:AE014299 Pro…	412	10	367	86.89	196.8	7e-49	122/360	33	191/360	53	4/360	1	1
gene3711	NC_004605.1	483621	485336	-	protein_coding	VPA0481	.	1191169	.	NP_799991.1	cation efflux system transmembrane protein	2.25253	3.77843	0.00337949	0.0184719	4.24503	3.1625	3.1625	4.24503	24	69	4.10527	11.8175	1716	121	1468	78.55	UNIPROTKB|Q47UM6 - symbol:cusB "Cation efflux system protein CusB" species:167879 "Colwellia psychrerythraea 34H" [GO:0005375 "copper ion transmembrane transporter activity" evidence=ISA] [GO:0006825 "copper ion transport" evidence=ISA] [GO:0010038 "response to metal ion" evidence=ISA] [GO:0015080 "silver ion transmembrane transporter activity" evidence=ISA] [GO:0015673 "silver ion transport" evi…	529	53	510	86.58	369.4	1e-100	191/459	41	277/459	60	11/459	2	1
gene3712	NC_004605.1	485440	486819	-	protein_coding	VPA0482	.	1191170	.	NP_799992.1	outer membrane cation efflux protein	2.27038	4.0458	0.00174499	0.0107095	4.51517	3.40747	3.40747	4.51517	29	84	6.16832	17.8893	1380	172	1267	79.42	UNIPROTKB|Q47UM7 - symbol:CPS_4856 "Putative cation efflux protein" species:167879 "Colwellia psychrerythraea 34H" [GO:0006812 "cation transport" evidence=ISA] [GO:0008324 "cation transmembrane transporter activity" evidence=ISA] [GO:0015562 "efflux transmembrane transporter activity" evidence=ISA] InterPro:IPR003423 Pfam:PF02321 GO:GO:0006810 GO:GO:0005215 EMBL:CP000083 Proteomes:UP000000547 Ref…	496	61	455	79.64	196.1	1e-48	121/396	30	203/396	51	32/396	8	1
gene3715	NC_004605.1	487745	492013	+	protein_coding	VPA0485	.	1191173	.	NP_799995.1	formate dehydrogenase subunit alpha	2.80891	8.0243	2.141e-11	5.75496e-10	8.5837	7.10023	7.10023	8.5837	411	1470	28.2595	101.201	4269	1	4213	98.69	TIGR_CMR|SO_0988 - symbol:SO_0988 "formate dehydrogenase, alpha subunit" species:211586 "Shewanella oneidensis MR-1" [GO:0008152 "metabolic process" evidence=ISS] [GO:0016491 "oxidoreductase activity" evidence=ISS] InterPro:IPR001041 InterPro:IPR006478 InterPro:IPR006656 InterPro:IPR006657 InterPro:IPR006963 InterPro:IPR009051 InterPro:IPR023753 InterPro:IPR036010 Pfam:PF00384 Pfam:PF01568 Pfam:P…	1428	1	1418	99.3	1642.9	0	840/1445	58	1044/1445	72	68/1445	4	1
gene3740	NC_004605.1	515727	516164	+	protein_coding	VPA0510	.	1191198	.	NP_800020.1	hypothetical protein	2.03162	6.96478	1.04921e-05	0.000116344	7.38666	6.37257	6.37257	7.38666	247	639	165.528	428.766	438				No hit
gene3750	NC_004605.1	526902	528095	+	protein_coding	VPA0520	.	1191208	.	NP_800030.1	multidrug resistance protein D	-2.53617	8.89965	3.57442e-10	8.20572e-09	8.08187	9.42141	9.42141	8.08187	2066	1037	507.895	255.252	1194	4	1177	98.32	UNIPROTKB|Q9KN82 - symbol:VC_A0083 "Multidrug resistance protein D" species:243277 "Vibrio cholerae O1 biovar El Tor str. N16961" [GO:0006855 "drug transmembrane transport" evidence=ISS] [GO:0042493 "response to drug" evidence=ISS] InterPro:IPR011701 Pfam:PF07690 GO:GO:0016021 GO:GO:0042493 Proteomes:UP000000584 GO:GO:0006855 CDD:cd06174 InterPro:IPR020846 InterPro:IPR036259 SUPFAM:SSF103473 EMBL…	403	10	400	97.02	516.9	3e-145	251/391	64	321/391	82	0/391	0	1
gene3757	NC_004605.1	532581	533630	+	protein_coding	VPA0527	.	1191215	.	NP_800037.1	outer membrane protein N	2.46185	5.41767	3.92086e-06	4.71725e-05	5.92154	4.65494	4.65494	5.92154	73	229	20.4071	64.0974	1050	1	1000	95.24	UNIPROTKB|Q8EFZ3 - symbol:SO_1821 "Outer membrane porin" species:211586 "Shewanella oneidensis MR-1" [GO:0006810 "transport" evidence=ISS] [GO:0015288 "porin activity" evidence=ISS] InterPro:IPR001702 InterPro:IPR001897 InterPro:IPR033900 Pfam:PF00267 PRINTS:PR00183 GO:GO:0016020 EMBL:AE014299 Proteomes:UP000008186 GO:GO:0006810 GO:GO:0015288 CDD:cd00342 eggNOG:COG3203 RefSeq:NP_717429.1 RefSeq:W…	398	1	360	90.45	107.8	4e-22	100/368	27	156/368	42	43/368	11	1
gene3765	NC_004605.1	537839	539533	-	protein_coding	VPA0535	.	1191223	.	NP_800045.1	phosphomannomutase	-2.29537	9.56649	1.35965e-08	2.56642e-07	8.84856	10.0456	10.0456	8.84856	3186	1767	551.727	306.38	1695	1	1693	99.88	UNIPROTKB|Q9KKR1 - symbol:VC_A1041 "Phosphomannomutase, putative" species:243277 "Vibrio cholerae O1 biovar El Tor str. N16961" [GO:0004615 "phosphomannomutase activity" evidence=ISS] [GO:0005829 "cytosol" evidence=IBA] [GO:0005975 "carbohydrate metabolic process" evidence=ISS] InterPro:IPR005841 InterPro:IPR005843 InterPro:IPR005844 InterPro:IPR005845 InterPro:IPR005846 InterPro:IPR016055 InterP…	567	1	567	100	848.6	7e-245	419/567	73	474/567	83	3/567	0	1
gene3767	NC_004605.1	541024	542661	+	protein_coding	VPA0537	.	1191225	.	NP_800047.1	cytochrome c oxidase subunit I	-2.53151	7.68816	1.99212e-09	4.25151e-08	6.87801	8.21084	8.21084	6.87801	891	448	159.666	80.3819	1638	52	1633	96.58	UNIPROTKB|Q8E8Q4 - symbol:coxA "Cytochrome c oxidase subunit 1" species:211586 "Shewanella oneidensis MR-1" [GO:0004129 "cytochrome-c oxidase activity" evidence=ISS] InterPro:IPR000883 InterPro:IPR014241 InterPro:IPR023615 InterPro:IPR023616 InterPro:IPR033944 InterPro:IPR036927 Pfam:PF00115 PRINTS:PR01165 PROSITE:PS00077 PROSITE:PS50855 UniPathway:UPA00705 GO:GO:0016021 GO:GO:0005886 GO:GO:00055…	530	3	529	99.43	978.4	5e-284	463/527	87	494/527	93	0/527	0	1
gene3770	NC_004605.1	544166	544507	-	protein_coding	VPA0541	.	1191228	.	NP_800050.1	hypothetical protein	-2.09974	5.39025	9.8553e-05	0.000879317	4.79767	5.84146	5.84146	4.79767	170	103	145.905	88.5126	342				No hit
gene3778	NC_004605.1	549139	549765	+	protein_coding	VPA0548	.	1191236	.	NP_800058.1	hypothetical protein	-7.29197	8.2298	1.9493e-34	2.58708e-32	6.19708	9.04695	9.04695	6.19708	1593	278	745.756	130.308	627	1	619	98.72	UNIPROTKB|Q9KLT2 - symbol:VC_A0659 "Protein F-related protein" species:243277 "Vibrio cholerae O1 biovar El Tor str. N16961" [GO:0008150 "biological_process" evidence=ND] [GO:0009279 "cell outer membrane" evidence=ISS] InterPro:IPR006664 PRINTS:PR01021 Pfam:PF00691 GO:GO:0016021 Proteomes:UP000000584 GO:GO:0009279 EMBL:AE003853 eggNOG:COG2885 CDD:cd07185 Gene3D:3.30.1330.60 InterPro:IPR006665 Int…	207	4	204	97.1	172.9	6e-42	82/206	39	127/206	61	5/206	2	1
gene3785	NC_004605.1	553839	554057	+	protein_coding	VPA0555	.	1191243	.	NP_800065.1	hypothetical protein	-2.87582	4.959	4.44309e-07	6.36004e-06	4.07718	5.54641	5.54641	4.07718	138	61	184.962	81.8615	219				No hit
gene3796	NC_004605.1	565869	567017	-	protein_coding	VPA0566	.	1191254	.	NP_800076.1	alcohol dehydrogenase	2.1616	9.59251	1.35123e-07	2.13334e-06	10.0438	8.9332	8.9332	10.0438	1472	4051	376.042	1036.18	1149	1	1147	99.83	UNIPROTKB|Q8EGV1 - symbol:adhB "Alcohol dehydrogenase II AdhB" species:211586 "Shewanella oneidensis MR-1" [GO:0004025 "alcohol dehydrogenase activity, iron-dependent" evidence=ISS] [GO:0005506 "iron ion binding" evidence=ISS] [GO:0006113 "fermentation" evidence=ISS] InterPro:IPR001670 InterPro:IPR018211 Pfam:PF00465 PROSITE:PS00060 PROSITE:PS00913 GO:GO:0005506 EMBL:AE014299 Proteomes:UP00000818…	382	1	382	100	570.5	2e-161	285/382	74	321/382	84	0/382	0	1
gene3800	NC_004605.1	569384	569872	-	protein_coding	VPA0570	.	1191258	.	NP_800080.1	hypothetical protein	2.47646	6.82308	3.62489e-08	6.36154e-07	7.33177	6.03617	6.03617	7.33177	195	615	117.051	369.624	489				No hit
gene3802	NC_004605.1	571441	572337	-	protein_coding	VPA0572	.	1191260	.	NP_800082.1	cation efflux system component	5.32728	9.23089	2.56057e-27	2.0913e-25	9.98161	7.57415	7.57415	9.98161	572	3880	187.177	1271.26	897	1	889	99.11	UNIPROTKB|Q9KLB2 - symbol:VC_A0834 "Uncharacterized protein" species:243277 "Vibrio cholerae O1 biovar El Tor str. N16961" [GO:0003674 "molecular_function" evidence=ND] [GO:0005385 "zinc ion transmembrane transporter activity" evidence=IBA] [GO:0005575 "cellular_component" evidence=ND] [GO:0008150 "biological_process" evidence=ND] [GO:0010043 "response to zinc ion" evidence=IBA] [GO:0016020 "memb…	317	20	316	93.69	341.3	2e-92	174/297	58	226/297	76	1/297	0	1
gene3807	NC_004605.1	577226	577564	+	protein_coding	VPA0577	.	1191265	phhB	NP_800087.1	4a-hydroxytetrahydrobiopterin dehydratase	-2.58858	6.35859	2.2682e-08	4.0818e-07	5.54088	6.89459	6.89459	5.54088	356	175	308.247	151.716	339	1	325	95.87	UNIPROTKB|Q9KLB9 - symbol:VC_A0827 "Putative pterin-4-alpha-carbinolamine dehydratase" species:243277 "Vibrio cholerae O1 biovar El Tor str. N16961" [GO:0006729 "tetrahydrobiopterin biosynthetic process" evidence=ISS] [GO:0008124 "4-alpha-hydroxytetrahydrobiopterin dehydratase activity" evidence=ISS] HAMAP:MF_00434 InterPro:IPR001533 InterPro:IPR036428 Pfam:PF01329 Proteomes:UP000000584 EMBL:AE00…	109	1	108	99.08	180.6	2e-44	84/108	77	93/108	86	0/108	0	1
gene3815	NC_004605.1	583108	584331	-	protein_coding	VPA0585	.	1191273	.	NP_800095.1	tryptophan synthase subunit beta	3.54837	6.55003	2.57052e-13	8.52891e-12	7.18721	5.38416	5.38416	7.18721	123	556	29.4966	133.502	1224	1	1195	97.63	UNIPROTKB|Q483T2 - symbol:trpB "Tryptophan synthase beta chain" species:167879 "Colwellia psychrerythraea 34H" [GO:0000162 "tryptophan biosynthetic process" evidence=ISM] [GO:0004834 "tryptophan synthase activity" evidence=ISM] HAMAP:MF_00133 InterPro:IPR006653 InterPro:IPR006654 InterPro:IPR023026 PIRSF:PIRSF001413 PROSITE:PS00168 UniPathway:UPA00035 Pfam:PF00291 InterPro:IPR001926 InterPro:IPR0…	400	1	397	99.25	564.3	2e-159	266/398	66	330/398	82	1/398	0	1
gene3816	NC_004605.1	584812	585060	-	protein_coding	VPA0586	.	1191274	.	NP_800096.1	hypothetical protein	-2.23485	3.21548	0.0107729	0.0484517	2.69302	3.72924	3.72924	2.69302	37	21	43.6165	24.7864	249				No hit
gene3826	NC_004605.1	597420	598976	+	protein_coding	VPA0596	.	1191284	.	NP_800106.1	methyl-accepting chemotaxis protein	-3.56337	7.35389	2.58574e-15	9.71826e-14	6.18164	8.00104	8.00104	6.18164	770	275	145.161	51.9084	1557	7	1240	79.25	UNIPROTKB|Q8EJ84 - symbol:SO_0584 "Chemotaxis signal transduction system methyl accepting sensory transducer with PAS sensory domain" species:211586 "Shewanella oneidensis MR-1" [GO:0004871 "signal transducer activity" evidence=ISS] [GO:0004872 "receptor activity" evidence=ISS] [GO:0006935 "chemotaxis" evidence=ISS] InterPro:IPR004089 InterPro:IPR013655 Pfam:PF00015 Pfam:PF08447 PROSITE:PS50111 S…	524	7	413	77.67	291.6	3e-77	169/414	40	244/414	58	10/414	2	1
gene3827	NC_004605.1	599034	599207	+	protein_coding	VPA0597	.	1191285	.	NP_800107.1	hypothetical protein	-7.34257	1.91304	0.000243751	0.00194955	0.832647	2.8002	2.8002	0.832647	18	3	30.3649	5.06718	174				No hit
gene3835	NC_004605.1	606160	606987	-	protein_coding	VPA0604	.	1191293	.	NP_800114.1	ABC transporter periplasmic substrate-binding protein	-4.79738	6.43027	9.89813e-19	4.52015e-17	4.93904	7.16497	7.16497	4.93904	430	114	152.436	40.464	828	1	805	97.22	UNIPROTKB|Q9KLD9 - symbol:VC_A0807 "ABC transporter, periplasmic substrate-binding protein" species:243277 "Vibrio cholerae O1 biovar El Tor str. N16961" [GO:0005886 "plasma membrane" evidence=IBA] [GO:0006810 "transport" evidence=ISS] [GO:0006817 "phosphate ion transport" evidence=IBA] [GO:0015415 "ATPase-coupled phosphate ion transmembrane transporter activity" evidence=IBA] [GO:0016036 "cellul…	278	1	272	97.84	343.6	3e-93	167/272	61	218/272	80	4/272	1	1
gene3836	NC_004605.1	607199	607597	+	protein_coding	VPA0605	.	1191294	.	NP_800115.1	hypothetical protein	2.34507	5.53321	7.07975e-06	8.10451e-05	6.01742	4.81637	4.81637	6.01742	82	245	60.3239	180.463	399	73	394	80.7	UNIPROTKB|Q9KLE0 - symbol:VC_A0806 "Uncharacterized protein" species:243277 "Vibrio cholerae O1 biovar El Tor str. N16961" [GO:0003674 "molecular_function" evidence=ND] [GO:0005575 "cellular_component" evidence=ND] [GO:0008150 "biological_process" evidence=ND] Proteomes:UP000000584 EMBL:AE003853 InterPro:IPR021388 Pfam:PF11225 PIR:E82415 RefSeq:NP_233192.1 RefSeq:WP_001882627.1 DNASU:2612320 Ense…	157	49	156	68.79	87.8	2e-16	41/108	37	65/108	60	1/108	0	1
gene3859	NC_004605.1	633817	635853	+	protein_coding	VPA0628	.	1191317	.	NP_800138.1	cytochrome o ubiquinol oxidase subunit I	3.10283	4.21428	6.89246e-06	7.91143e-05	4.79767	3.26553	3.26553	4.79767	26	103	3.74654	14.8607	2037	1	1945	95.48	UNIPROTKB|P0ABI8 - symbol:cyoB species:83333 "Escherichia coli K-12" [GO:0005887 "integral component of plasma membrane" evidence=ISM;IDA] [GO:0005515 "protein binding" evidence=IPI] [GO:0009060 "aerobic respiration" evidence=IEP;IMP] [GO:0005886 "plasma membrane" evidence=IDA] [GO:0009319 "cytochrome o ubiquinol oxidase complex" evidence=IDA] [GO:0015990 "electron transport coupled proton transp…	663	1	647	97.59	1054.3	9e-307	483/648	74	571/648	88	1/648	0	1
gene3862	NC_004605.1	636765	637631	+	protein_coding	VPA0631	.	1191320	.	NP_800141.1	protoheme IX farnesyltransferase	-3.7674	4.33448	3.7582e-08	6.56835e-07	3.2219	5.02165	5.02165	3.2219	95	32	32.1627	10.8474	867	4	847	97.35	UNIPROTKB|Q4K6M1 - symbol:cyoE2 "Protoheme IX farnesyltransferase 2" species:220664 "Pseudomonas protegens Pf-5" [GO:0006783 "heme biosynthetic process" evidence=ISM] [GO:0008495 "protoheme IX farnesyltransferase activity" evidence=ISM] HAMAP:MF_00154 InterPro:IPR000537 InterPro:IPR006369 Pfam:PF01040 UniPathway:UPA00834 Prosite:PS00943 GO:GO:0016021 GO:GO:0005886 EMBL:CP000076 Proteomes:UP000008…	295	3	282	94.92	280.4	4e-74	139/281	49	193/281	68	1/281	0	1
gene3880	NC_004605.1	654339	654965	+	protein_coding	VPA0649	.	1191338	.	NP_800159.1	hypothetical protein	-2.07902	4.68094	0.000724463	0.00509403	4.12101	5.13484	5.13484	4.12101	103	63	48.219	29.5302	627				No hit
gene3887	NC_004605.1	659198	659878	+	protein_coding	VPA0656	.	1191345	.	NP_800166.1	cyclic nucleotide binding protein	-2.22597	5.22204	4.84214e-05	0.000471665	4.57941	5.70147	5.70147	4.57941	154	88	66.3777	37.9778	681	1	679	99.71	UNIPROTKB|Q9KN31 - symbol:VC_A0135 "Cyclic nucleotide binding protein, putative" species:243277 "Vibrio cholerae O1 biovar El Tor str. N16961" [GO:0003700 "DNA binding transcription factor activity" evidence=ISS] [GO:0006355 "regulation of transcription, DNA-templated" evidence=ISS] InterPro:IPR000595 Pfam:PF00027 Gene3D:2.60.120.10 InterPro:IPR014710 GO:GO:0006355 GO:GO:0003700 Proteomes:UP00000…	226	1	226	100	282	1e-74	135/226	59	176/226	77	0/226	0	1
gene3888	NC_004605.1	660042	660950	+	protein_coding	VPA0657	.	1191346	.	NP_800167.1	iron(III) ABC transporter periplasmic iron-compound-binding protein	-4.19256	7.74003	1.94928e-19	9.51562e-18	6.37955	8.43461	8.43461	6.37955	1041	316	336.152	102.169	909	1	907	99.78	TIGR_CMR|VC_A0227 - symbol:VC_A0227 "vibriobactin and enterobactin ABC transporter, periplasmic vibriobactin/enterobactin-binding protein" species:686 "Vibrio cholerae O1 biovar El Tor" [GO:0015343 "siderophore transmembrane transporter activity" evidence=IGI] [GO:0015891 "siderophore transport" evidence=IGI] [GO:0042626 "ATPase activity, coupled to transmembrane movement of substances" evidence=…	333	31	332	90.69	358.2	1e-97	172/302	56	225/302	74	0/302	0	1
gene3892	NC_004605.1	663657	664043	-	protein_coding	VPA0662	.	1191350	.	NP_800171.1	MerR family transcriptional regulator	-5.75232	4.53136	1.14126e-12	3.43753e-11	2.95759	5.32576	5.32576	2.95759	118	26	89.4992	19.745	387	1	379	97.93	TIGR_CMR|VC_0974 - symbol:VC_0974 "transcriptional regulator, MerR family" species:686 "Vibrio cholerae O1 biovar El Tor" [GO:0003700 "DNA binding transcription factor activity" evidence=ISS] [GO:0006355 "regulation of transcription, DNA-templated" evidence=ISS] InterPro:IPR000551 InterPro:IPR011789 Pfam:PF13411 PROSITE:PS00552 PROSITE:PS50937 SMART:SM00422 InterPro:IPR009061 GO:GO:0005737 GO:GO:…	139	1	126	90.65	148.3	1e-34	66/126	52	94/126	74	0/126	0	1
gene3898	NC_004605.1	668312	668605	+	protein_coding	VPA0667	.	1191356	.	NP_800177.1	hypothetical protein	-7.95664	6.63344	1.10403e-29	9.97617e-28	4.5315	7.47013	7.47013	4.5315	532	85	531.144	84.97	294				No hit
gene3909	NC_004605.1	700147	700533	-	protein_coding	VPA0678	.	1191367	.	NP_800188.1	hypothetical protein	-2.27859	4.52394	0.000234113	0.00189243	3.88721	5.02165	5.02165	3.88721	95	53	72.0545	40.2493	387	154	382	59.17	UNIPROTKB|Q4K895 - symbol:PFL_4450 "DNA-binding response regulator" species:220664 "Pseudomonas protegens Pf-5" [GO:0000156 "phosphorelay response regulator activity" evidence=ISM] [GO:0000160 "phosphorelay signal transduction system" evidence=ISM] [GO:0003700 "DNA binding transcription factor activity" evidence=ISM] [GO:0006355 "regulation of transcription, DNA-templated" evidence=ISM] InterPro:…	240	162	237	31.67	72.4	7e-12	34/76	44	55/76	72	0/76	0	1
gene3928	NC_004605.1	721095	722078	-	protein_coding	VPA0697	.	1191386	.	NP_800207.1	nonspecific acid phosphatase	-2.15942	5.15978	0.000101288	0.000901827	4.54765	5.62602	5.62602	4.54765	146	86	43.5518	25.686	984	13	982	98.58	UNIPROTKB|Q4KCT4 - symbol:PFL_2843 "Nonspecific acid phosphatase" species:220664 "Pseudomonas protegens Pf-5" [GO:0003993 "acid phosphatase activity" evidence=ISA] [GO:0006793 "phosphorus metabolic process" evidence=ISA] InterPro:IPR023214 Gene3D:3.40.50.1000 InterPro:IPR036412 SUPFAM:SSF56784 EMBL:CP000076 Proteomes:UP000008540 RefSeq:WP_011061133.1 ProteinModelPortal:Q4KCT4 STRING:220664.PFL_28…	341	11	330	93.84	313.9	3e-84	153/324	47	215/324	66	5/324	1	1
gene3977	NC_004605.1	778317	779291	+	protein_coding	VPA0746	.	1191435	.	NP_800256.1	chemotaxis protein CheV	-7.86109	8.08936	4.97874e-36	7.83138e-34	5.96428	8.91944	8.91944	5.96428	1458	236	438.936	71.1379	975	1	967	99.18	UNIPROTKB|Q9KRN4 - symbol:VC_1602 "Chemotaxis protein CheV" species:243277 "Vibrio cholerae O1 biovar El Tor str. N16961" [GO:0004871 "signal transducer activity" evidence=ISS] [GO:0006935 "chemotaxis" evidence=ISS] InterPro:IPR001789 InterPro:IPR002545 InterPro:IPR036061 Pfam:PF00072 Pfam:PF01584 PROSITE:PS50110 PROSITE:PS50851 SMART:SM00260 SMART:SM00448 GO:GO:0005829 EMBL:AE003852 Proteomes:UP…	328	4	325	98.17	557.8	1e-157	274/322	85	301/322	93	0/322	0	1
gene3994	NC_004605.1	793868	795442	+	protein_coding	VPA0763	.	1191452	.	NP_800273.1	sensor kinase CitA	2.04779	4.24508	0.00282469	0.0158332	4.67071	3.69273	3.69273	4.67071	36	94	6.70919	17.5405	1575	13	1561	98.35	UNIPROTKB|Q9KTU6 - symbol:VC_0791 "Sensor kinase citA" species:243277 "Vibrio cholerae O1 biovar El Tor str. N16961" [GO:0000155 "phosphorelay sensor kinase activity" evidence=ISS] [GO:0000160 "phosphorelay signal transduction system" evidence=ISS] InterPro:IPR004358 InterPro:IPR016120 PRINTS:PR00344 InterPro:IPR003594 InterPro:IPR000014 Pfam:PF02518 InterPro:IPR005467 GO:GO:0016021 GO:GO:0005524…	565	16	547	94.16	271.2	4e-71	160/533	30	285/533	53	18/533	3	1
gene4003	NC_004605.1	803997	804272	+	protein_coding	VPA0772	.	1191461	.	NP_800282.1	hypothetical protein	2.31218	3.62197	0.00291919	0.0163129	4.09926	2.99269	2.99269	4.09926	21	62	22.3336	66.0202	276				No hit
gene4004	NC_004605.1	804393	805493	-	protein_coding	VPA0773	.	1191462	.	NP_800283.1	N-ethylmaleimide reductase	2.84707	3.8946	0.000134138	0.00115789	4.44793	3.05155	3.05155	4.44793	22	80	5.86521	21.3549	1101	1	1096	99.55	UNIPROTKB|Q8EEC8 - symbol:sye1 "NADH:flavin oxidoreductase Sye1" species:211586 "Shewanella oneidensis MR-1" [GO:0003959 "NADPH dehydrogenase activity" evidence=IBA] [GO:0005829 "cytosol" evidence=IBA] [GO:0055114 "oxidation-reduction process" evidence=IBA] InterPro:IPR001155 InterPro:IPR013785 Pfam:PF00724 GO:GO:0005829 GO:GO:0016491 Gene3D:3.20.20.70 EMBL:AE014299 Proteomes:UP000008186 GO:GO:00…	365	1	365	100	604.7	1e-171	291/365	79	324/365	88	0/365	0	1
gene4013	NC_004605.1	812460	812789	+	protein_coding	VPA0782	.	1191471	.	NP_800292.1	lipoprotein	-2.69054	3.02144	0.00377845	0.0203385	2.36879	3.61682	3.61682	2.36879	34	16	30.2422	14.2495	330				No hit
gene4016	NC_004605.1	814071	814490	-	protein_coding	VPA0785	.	1191474	.	NP_800295.1	transcriptional regulator	-4.17211	4.04276	4.42692e-08	7.67393e-07	2.8575	4.76454	4.76454	2.8575	79	24	55.2111	16.7941	420	13	397	91.67	TIGR_CMR|SPO_3734 - symbol:SPO_3734 "transcriptional regulator, MerR family" species:246200 "Ruegeria pomeroyi DSS-3" [GO:0003700 "DNA binding transcription factor activity" evidence=ISS] [GO:0006355 "regulation of transcription, DNA-templated" evidence=ISS] InterPro:IPR000551 Pfam:PF13411 PRINTS:PR00040 PROSITE:PS50937 SMART:SM00422 InterPro:IPR009061 GO:GO:0006355 EMBL:CP000031 Proteomes:UP0000…	140	4	129	90	131	2e-29	65/128	50	90/128	70	2/128	1	1
gene4017	NC_004605.1	814563	815066	+	protein_coding	VPA0786	.	1191475	.	NP_800296.1	hypothetical protein	4.42244	2.13758	0.00432709	0.0228672	2.80473	1.21763	1.21763	2.80473	4	23	2.32958	13.4119	504	19	463	88.29	UNIPROTKB|Q4K6P8 - symbol:PFL_5006 "Uncharacterized protein" species:220664 "Pseudomonas protegens Pf-5" [GO:0003674 "molecular_function" evidence=ND] [GO:0005575 "cellular_component" evidence=ND] [GO:0008150 "biological_process" evidence=ND] GO:GO:0016021 EMBL:CP000076 Proteomes:UP000008540 RefSeq:WP_011063256.1 STRING:220664.PFL_5006 EnsemblBacteria:AAY94234 KEGG:pfl:PFL_5006 PATRIC:fig|220664.…	169	9	156	87.57	148.3	1e-34	70/148	47	94/148	63	0/148	0	1
gene4026	NC_004605.1	822670	823539	+	protein_coding	VPA0795	.	1191484	.	NP_800305.1	acetyl-CoA carboxylase carboxyltransferase subunit beta	2.86754	5.25089	2.06947e-07	3.19602e-06	5.81217	4.33783	4.33783	5.81217	58	212	19.5685	71.6161	870	1	865	99.43	UNIPROTKB|Q9KTA3 - symbol:accD "Acetyl-coenzyme A carboxylase carboxyl transferase subunit beta" species:243277 "Vibrio cholerae O1 biovar El Tor str. N16961" [GO:0003989 "acetyl-CoA carboxylase activity" evidence=ISS] [GO:0006633 "fatty acid biosynthetic process" evidence=ISS] [GO:0009317 "acetyl-CoA carboxylase complex" evidence=ISS] UniPathway:UPA00655 HAMAP:MF_01395 InterPro:IPR000438 PRINTS:…	308	1	288	93.51	407.9	2e-112	203/288	70	237/288	82	0/288	0	1
gene4028	NC_004605.1	824843	825103	+	protein_coding	VPA0797	.	1191486	.	NP_800307.1	hypothetical protein	3.02683	5.70917	5.22402e-09	1.05149e-07	6.2912	4.72893	4.72893	6.2912	77	297	86.5961	334.434	261	16	256	92.34	UNIPROTKB|Q480M7 - symbol:CPS_2780 "Uncharacterized protein" species:167879 "Colwellia psychrerythraea 34H" [GO:0003674 "molecular_function" evidence=ND] [GO:0005575 "cellular_component" evidence=ND] [GO:0008150 "biological_process" evidence=ND] EMBL:CP000083 Proteomes:UP000000547 STRING:167879.CPS_2780 EnsemblBacteria:AAZ26629 KEGG:cps:CPS_2780 eggNOG:ENOG4105VH2 eggNOG:ENOG41121SH HOGENOM:HOG00…	93	10	91	88.17	51.2	1e-05	30/82	36	47/82	57	2/82	2	1
gene4038	NC_004605.1	836187	837272	+	protein_coding	VPA0807	.	1191496	.	NP_800317.1	multidrug resistance protein	2.70747	9.56101	1.42309e-11	3.95023e-10	10.1071	8.67232	8.67232	10.1071	1228	4233	331.907	1145.55	1086	70	1084	93.46	UNIPROTKB|Q9KRG7 - symbol:VC_1675 "Multidrug resistance protein, putative" species:243277 "Vibrio cholerae O1 biovar El Tor str. N16961" [GO:0006855 "drug transmembrane transport" evidence=ISS] [GO:0042493 "response to drug" evidence=ISS] InterPro:IPR006143 GO:GO:0016020 GO:GO:0042493 EMBL:AE003852 Proteomes:UP000000584 TIGRFAMs:TIGR01730 GO:GO:0005215 GO:GO:0006855 InterPro:IPR032317 Pfam:PF1657…	343	12	343	96.79	201.1	3e-50	122/338	36	190/338	56	6/338	1	1
gene4039	NC_004605.1	837272	838333	+	protein_coding	VPA0808	.	1191497	.	NP_800318.1	periplasmic linker protein	2.43791	10.2124	9.79866e-10	2.12321e-08	10.7163	9.43184	9.43184	10.7163	2081	6459	575.169	1787.45	1062	145	1054	85.69	UNIPROTKB|Q9KRG8 - symbol:VC_1674 "Periplasmic linker protein, putative" species:243277 "Vibrio cholerae O1 biovar El Tor str. N16961" [GO:0008565 "protein transporter activity" evidence=ISS] [GO:0009306 "protein secretion" evidence=ISS] InterPro:IPR006143 GO:GO:0005886 GO:GO:0008565 EMBL:AE003852 Proteomes:UP000000584 TIGRFAMs:TIGR01730 GO:GO:0009306 GO:GO:0055085 eggNOG:COG0845 eggNOG:ENOG4108K…	369	58	365	83.47	137.1	6e-31	92/309	29	163/309	52	7/309	2	1
gene4040	NC_004605.1	838333	841392	+	protein_coding	VPA0809	.	1191498	.	NP_800319.1	AcrB/AcrD/AcrF family transporter	3.35626	11.419	1.4373e-16	6.04377e-15	12.0427	10.2966	10.2966	12.0427	3792	16203	363.743	1556.21	3060	7	3046	99.35	UNIPROTKB|Q9KRG9 - symbol:VC_1673 "Transporter, AcrB/D/F family" species:243277 "Vibrio cholerae O1 biovar El Tor str. N16961" [GO:0005215 "transporter activity" evidence=ISS] [GO:0006810 "transport" evidence=ISS] InterPro:IPR001036 Pfam:PF00873 PRINTS:PR00702 GO:GO:0016021 EMBL:AE003852 Proteomes:UP000000584 GO:GO:0006810 GO:GO:0005215 eggNOG:ENOG4105BZS eggNOG:COG0841 Gene3D:3.30.2090.10 InterP…	1037	22	1034	97.69	1150.6	0	566/1013	55	741/1013	73	0/1013	0	1
gene4047	NC_004605.1	848613	848741	+	protein_coding	VPA0816	.	1191505	.	NP_800326.1	hypothetical protein	-9.05671	0.94911	0.0246349	0.0948546	0.333786	1.8684	1.8684	0.333786	8	1	18.2032	2.27827	129				No hit
gene4067	NC_004605.1	873903	874376	-	protein_coding	VPA0836	.	1191525	.	NP_800346.1	CreA protein	-2.56735	5.68393	2.9343e-07	4.40352e-06	4.88922	6.22058	6.22058	4.88922	222	110	137.475	68.2038	474	1	454	95.78	UNIPROTKB|Q485T6 - symbol:creA "CreA protein" species:167879 "Colwellia psychrerythraea 34H" [GO:0003674 "molecular_function" evidence=ND] [GO:0008150 "biological_process" evidence=ND] EMBL:CP000083 Proteomes:UP000000547 eggNOG:ENOG4108RH0 eggNOG:COG3045 HOGENOM:HOG000257967 KO:K05805 InterPro:IPR010292 PANTHER:PTHR37952 Pfam:PF05981 PIRSF:PIRSF003174 OMA:QGVTCYV RefSeq:WP_011042273.1 STRING:1678…	159	1	151	94.97	249.6	4e-65	119/151	78	138/151	91	0/151	0	1
gene4072	NC_004605.1	877162	877830	+	protein_coding	VPA0841	.	1191530	.	NP_800351.1	CbbY family protein	3.41002	6.52878	1.17151e-12	3.50381e-11	7.15332	5.40688	5.40688	7.15332	125	543	54.8444	238.544	669	1	658	98.36	UNIPROTKB|Q9KLE8 - symbol:VC_A0798 "CbbY family protein" species:243277 "Vibrio cholerae O1 biovar El Tor str. N16961" [GO:0016787 "hydrolase activity" evidence=ISS] InterPro:IPR006439 PRINTS:PR00413 InterPro:IPR023214 GO:GO:0016787 Proteomes:UP000000584 Gene3D:3.40.50.1000 InterPro:IPR036412 SUPFAM:SSF56784 Gene3D:1.10.150.240 InterPro:IPR023198 TIGRFAMs:TIGR01509 EMBL:AE003853 GO:GO:0004346 egg…	226	1	219	96.9	233	5e-60	116/219	52	150/219	68	0/219	0	1
gene4082	NC_004605.1	885825	887276	-	protein_coding	VPA0851	.	1191540	.	NP_800361.1	formate transporter 1	2.50979	5.6695	1.02131e-06	1.37698e-05	6.18164	4.8827	4.8827	6.18164	86	275	17.3852	55.6622	1452	1	1450	99.86	UNIPROTKB|Q9KM49 - symbol:VC_A0540 "Formate transporter 1, putative" species:243277 "Vibrio cholerae O1 biovar El Tor str. N16961" [GO:0005887 "integral component of plasma membrane" evidence=IBA] [GO:0015499 "formate transmembrane transporter activity" evidence=ISS;IBA] [GO:0015724 "formate transport" evidence=ISS;IBA] [GO:0015513 "high-affinity secondary active nitrite transmembrane transporter…	483	1	483	100	761.9	7e-219	377/483	78	430/483	89	0/483	0	1
gene4085	NC_004605.1	889391	891025	-	protein_coding	VPA0854	.	1191543	.	NP_800364.1	hypothetical protein	3.55651	8.11169	4.09086e-16	1.65466e-14	8.75256	6.93031	6.93031	8.75256	365	1653	65.5275	297.132	1635	1	1633	99.88	UNIPROTKB|Q9KM45 - symbol:VC_A0544 "Uncharacterized protein" species:243277 "Vibrio cholerae O1 biovar El Tor str. N16961" [GO:0000731 "DNA synthesis involved in DNA repair" evidence=IBA] [GO:0003674 "molecular_function" evidence=ND] [GO:0005575 "cellular_component" evidence=ND] [GO:0006302 "double-strand break repair" evidence=IBA] [GO:0008150 "biological_process" evidence=ND] InterPro:IPR027417…	554	12	554	98.01	842.4	5e-243	408/544	75	471/544	86	1/544	0	1
gene4088	NC_004605.1	894860	895051	+	protein_coding	VPA0857	.	1191546	.	NP_800367.1	hypothetical protein	-2.15709	6.36713	5.18472e-06	6.08274e-05	5.72964	6.82461	6.82461	5.72964	339	200	518.259	306.142	192	1	190	98.96	UNIPROTKB|Q9KM42 - symbol:VC_A0547 "Uncharacterized protein" species:243277 "Vibrio cholerae O1 biovar El Tor str. N16961" [GO:0003674 "molecular_function" evidence=ND] [GO:0005575 "cellular_component" evidence=ND] [GO:0008150 "biological_process" evidence=ND] Proteomes:UP000000584 EMBL:AE003853 PIR:C82447 RefSeq:NP_232937.1 RefSeq:WP_000035884.1 STRING:243277.VCA0547 DNASU:2612840 EnsemblBacteri…	62	1	62	100	99	3e-20	48/63	76	55/63	87	1/63	1	1
gene4112	NC_004605.1	924377	924529	-	protein_coding	VPA0881	.	1191570	.	NP_800391.1	hypothetical protein	-2.45929	3.01774	0.00843262	0.0400597	2.43972	3.57731	3.57731	2.43972	33	17	63.3098	32.6551	153				No hit
gene4113	NC_004605.1	924558	926639	-	protein_coding	VPA0882	.	1191571	.	NP_800392.1	heme transport protein HutA	-2.24619	6.52414	1.22635e-06	1.61248e-05	5.84521	6.99921	6.99921	5.84521	383	217	53.9966	30.6318	2082	1	2080	99.9	UNIPROTKB|Q9KM13 - symbol:VC_A0576 "Heme transport protein HutA" species:243277 "Vibrio cholerae O1 biovar El Tor str. N16961" [GO:0009279 "cell outer membrane" evidence=IBA] [GO:0015232 "heme transporter activity" evidence=ISS] [GO:0015344 "siderophore uptake transmembrane transporter activity" evidence=IBA] [GO:0015886 "heme transport" evidence=ISS] InterPro:IPR010949 InterPro:IPR011276 InterPr…	698	6	698	99.28	969.5	3e-281	469/696	67	569/696	81	6/696	0	1
gene4146	NC_004605.1	948185	948574	-	protein_coding	VPA0915	.	1191604	.	NP_800425.1	universal stress protein A	-2.23719	6.75774	7.6265e-07	1.06196e-05	6.07983	7.23011	7.23011	6.07983	450	256	338.685	192.916	390	1	388	99.49	TIGR_CMR|VC_0076 - symbol:VC_0076 "universal stress protein A" species:686 "Vibrio cholerae O1 biovar El Tor" [GO:0006950 "response to stress" evidence=ISS] InterPro:IPR006016 Pfam:PF00582 InterPro:IPR006015 InterPro:IPR014729 GO:GO:0005737 EMBL:AE003852 Proteomes:UP000000584 GO:GO:0006950 Gene3D:3.40.50.620 eggNOG:COG0589 KO:K06149 PIRSF:PIRSF006276 PIR:D82368 RefSeq:NP_229735.1 RefSeq:WP_000121…	141	1	141	100	90.1	3e-17	53/141	37	81/141	57	12/141	8	1
gene4148	NC_004605.1	949538	950659	-	protein_coding	VPA0917	.	1191606	.	NP_800427.1	hypothetical protein	-3.64714	7.08463	2.75534e-15	1.02649e-13	5.89023	7.73988	7.73988	5.89023	642	224	167.954	58.6745	1122	22	1120	97.95	UNIPROTKB|Q9KM21 - symbol:VC_A0568 "Uncharacterized protein" species:243277 "Vibrio cholerae O1 biovar El Tor str. N16961" [GO:0003674 "molecular_function" evidence=ND] [GO:0005575 "cellular_component" evidence=ND] [GO:0008150 "biological_process" evidence=ND] Proteomes:UP000000584 EMBL:AE003853 PIR:A82445 RefSeq:NP_232958.1 RefSeq:WP_000822678.1 STRING:243277.VCA0568 DNASU:2612595 EnsemblBacteri…	388	6	388	98.71	438.3	1e-121	220/386	56	284/386	73	23/386	5	1
gene4164	NC_004605.1	966465	966836	+	protein_coding	VPA0933	.	1191622	.	NP_800443.1	hypothetical protein	-3.97955	9.41647	3.09799e-20	1.5299e-18	8.10525	10.0941	10.0941	8.10525	3295	1054	2599.92	832.706	372	1	370	99.46	UNIPROTKB|Q9KLL1 - symbol:VC_A0732 "Uncharacterized protein" species:243277 "Vibrio cholerae O1 biovar El Tor str. N16961" [GO:0003674 "molecular_function" evidence=ND] [GO:0005575 "cellular_component" evidence=ND] [GO:0008150 "biological_process" evidence=ND] Proteomes:UP000000584 EMBL:AE003853 eggNOG:COG3111 InterPro:IPR036700 InterPro:IPR005220 Pfam:PF04076 SUPFAM:SSF101756 PIR:G82423 RefSeq:N…	132	1	132	100	139	6e-32	71/132	53	94/132	71	9/132	6	1
gene4165	NC_004605.1	966914	967528	+	protein_coding	VPA0934	.	1191623	.	NP_800444.1	hypothetical protein	-2.84665	8.91117	2.58468e-12	7.62301e-11	7.97249	9.47816	9.47816	7.97249	2149	961	1025.67	459.243	615	79	613	86.99	UNIPROTKB|Q9KLK9 - symbol:VC_A0734 "Uncharacterized protein" species:243277 "Vibrio cholerae O1 biovar El Tor str. N16961" [GO:0003674 "molecular_function" evidence=ND] [GO:0005575 "cellular_component" evidence=ND] [GO:0008150 "biological_process" evidence=ND] Proteomes:UP000000584 EMBL:AE003853 PIR:A82424 RefSeq:NP_233121.1 RefSeq:WP_001882574.1 STRING:243277.VCA0734 DNASU:2611944 EnsemblBacteri…	179	8	179	96.09	177.6	2e-43	92/181	50	118/181	65	12/181	6	1
gene4173	NC_004605.1	975100	975981	+	protein_coding	VPA0942	.	1191631	.	NP_800452.1	hypothetical protein	2.57861	7.35743	2.28699e-09	4.85641e-08	7.88305	6.52572	6.52572	7.88305	275	903	91.5192	300.894	882	40	877	95.01	UNIPROTKB|Q483Q6 - symbol:CPS_1980 "Endonuclease/exonuclease/phosphatase family protein" species:167879 "Colwellia psychrerythraea 34H" [GO:0004518 "nuclease activity" evidence=ISM] [GO:0008150 "biological_process" evidence=ND] [GO:0016791 "phosphatase activity" evidence=ISM] InterPro:IPR005135 Pfam:PF03372 EMBL:CP000083 Proteomes:UP000000547 GO:GO:0004527 GO:GO:0004519 Gene3D:3.60.10.10 InterPro…	301	13	301	96.01	107.1	6e-22	92/309	29	128/309	41	50/309	16	1
gene4174	NC_004605.1	976070	977125	-	protein_coding	VPA0943	.	1191632	.	NP_800453.1	AcrA/AcrE family protein	2.26521	7.23595	2.57684e-07	3.92111e-06	7.70731	6.53606	6.53606	7.70731	277	799	76.9953	222.37	1056	28	1036	95.55	UNIPROTKB|Q486N8 - symbol:CPS_1234 "Efflux transporter, RND family, MFP subunit, AcrA/E family" species:167879 "Colwellia psychrerythraea 34H" [GO:0005215 "transporter activity" evidence=ISM] [GO:0006810 "transport" evidence=ISM] InterPro:IPR006143 GO:GO:0016021 TIGRFAMs:TIGR01730 GO:GO:0055085 GO:GO:0005215 EMBL:CP000083 Proteomes:UP000000547 InterPro:IPR032317 Pfam:PF16576 OrthoDB:POG091H0233 e…	359	19	356	94.15	149.8	9e-35	104/341	30	186/341	54	8/341	2	1
gene4175	NC_004605.1	977122	980430	-	protein_coding	VPA0944	.	1191633	.	NP_800454.1	AcrB/AcrD/AcrF family cation efflux system	4.60191	10.2754	2.33853e-24	1.62815e-22	10.9913	8.79149	8.79149	10.9913	1334	7816	118.333	694.195	3309	22	3274	98.31	UNIPROTKB|Q486N7 - symbol:CPS_1235 "AcrB/AcrD/AcrF family protein" species:167879 "Colwellia psychrerythraea 34H" [GO:0005215 "transporter activity" evidence=ISM] [GO:0006810 "transport" evidence=ISM] [GO:0006855 "drug transmembrane transport" evidence=ISM] [GO:0016020 "membrane" evidence=ISM] InterPro:IPR001036 Pfam:PF00873 PRINTS:PR00702 GO:GO:0016021 GO:GO:0006810 GO:GO:0005215 EMBL:CP000083 P…	1146	10	1118	96.77	1104.7	0	569/1109	51	782/1109	70	25/1109	2	1
gene4176	NC_004605.1	980459	980917	-	protein_coding	VPA0945	.	1191634	.	NP_800455.1	hypothetical protein	2.53406	8.39683	8.04333e-10	1.7979e-08	8.9162	7.57916	7.57916	8.9162	574	1852	367.069	1185.83	459	1	457	99.56	UNIPROTKB|Q9KLV1 - symbol:VC_A0640 "Uncharacterized protein" species:243277 "Vibrio cholerae O1 biovar El Tor str. N16961" [GO:0003674 "molecular_function" evidence=ND] [GO:0005575 "cellular_component" evidence=ND] [GO:0008150 "biological_process" evidence=ND] GO:GO:0016021 Proteomes:UP000000584 EMBL:AE003853 eggNOG:COG2391 KO:K07112 eggNOG:ENOG4105KFG OMA:YCPGPAI PIR:F82433 RefSeq:NP_233029.1 Re…	154	3	154	98.7	197.2	2e-49	93/152	61	117/152	76	0/152	0	1
gene4177	NC_004605.1	980928	981347	-	protein_coding	VPA0946	.	1191635	.	NP_800456.1	hypothetical protein	2.31468	8.42467	2.48664e-08	4.4373e-07	8.90606	7.69905	7.69905	8.90606	624	1839	436.097	1286.85	420	13	418	96.67	UNIPROTKB|Q9KLV0 - symbol:VC_A0641 "Uncharacterized protein" species:243277 "Vibrio cholerae O1 biovar El Tor str. N16961" [GO:0003674 "molecular_function" evidence=ND] [GO:0005575 "cellular_component" evidence=ND] [GO:0008150 "biological_process" evidence=ND] GO:GO:0016021 Proteomes:UP000000584 EMBL:AE003853 eggNOG:COG2391 KO:K07112 InterPro:IPR007272 Pfam:PF04143 eggNOG:ENOG4105MD1 OMA:ATLTFMG …	139	5	139	97.12	179.1	5e-44	86/135	63	108/135	80	0/135	0	1
gene4180	NC_004605.1	982120	983823	+	protein_coding	VPA0949	.	1191638	.	NP_800459.1	NADH oxidase	4.09305	9.81356	4.77102e-21	2.56488e-19	10.4976	8.4674	8.4674	10.4976	1065	5550	183.454	957.232	1704	1	1699	99.71	UNIPROTKB|Q9KLU7 - symbol:VC_A0644 "NADH oxidase, putative" species:243277 "Vibrio cholerae O1 biovar El Tor str. N16961" [GO:0003954 "NADH dehydrogenase activity" evidence=ISS] InterPro:IPR004099 InterPro:IPR016156 InterPro:IPR023753 Pfam:PF02852 Pfam:PF07992 Pfam:PF00581 GO:GO:0050660 Gene3D:3.50.50.60 InterPro:IPR036188 SUPFAM:SSF51905 Proteomes:UP000000584 GO:GO:0005623 EMBL:AE003853 Gene3D:3…	567	1	566	99.82	976.9	2e-283	482/566	85	532/566	93	0/566	0	1
gene4189	NC_004605.1	999917	1000321	+	protein_coding	VPA0958	.	1191647	.	NP_800468.1	NADH oxidase	2.94243	5.50289	2.43209e-08	4.35827e-07	6.07426	4.55679	4.55679	6.07426	68	255	49.2836	185.046	405	1	403	99.51	UNIPROTKB|Q9KLU7 - symbol:VC_A0644 "NADH oxidase, putative" species:243277 "Vibrio cholerae O1 biovar El Tor str. N16961" [GO:0003954 "NADH dehydrogenase activity" evidence=ISS] InterPro:IPR004099 InterPro:IPR016156 InterPro:IPR023753 Pfam:PF02852 Pfam:PF07992 Pfam:PF00581 GO:GO:0050660 Gene3D:3.50.50.60 InterPro:IPR036188 SUPFAM:SSF51905 Proteomes:UP000000584 GO:GO:0005623 EMBL:AE003853 Gene3D:3…	567	434	567	23.63	242.7	4e-63	117/134	87	128/134	95	0/134	0	1
gene4211	NC_004605.1	1025894	1026631	-	protein_coding	VPA0980	.	1191669	.	NP_800490.1	hypothetical protein	-2.68951	3.63284	0.000341983	0.00266636	2.90841	4.21449	4.21449	2.90841	53	25	21.0799	9.95583	738				No hit
gene4240	NC_004605.1	1057757	1059463	-	protein_coding	VPA1005	.	1191698	.	NP_800515.1	D-lactate dehydrogenase	2.03033	6.02447	5.93897e-05	0.000564269	6.44567	5.4403	5.4403	6.44567	128	331	22.0102	56.9887	1707	10	1684	98.13	UNIPROTKB|P06149 - symbol:dld "D-lactate dehydrogenase" species:83333 "Escherichia coli K-12" [GO:0071949 "FAD binding" evidence=IBA] [GO:0051990 "(R)-2-hydroxyglutarate dehydrogenase activity" evidence=IBA] [GO:0004458 "D-lactate dehydrogenase (cytochrome) activity" evidence=IBA] [GO:0031234 "extrinsic component of cytoplasmic side of plasma membrane" evidence=IDA] [GO:0022904 "respiratory elect…	571	10	565	97.37	679.1	7e-194	326/558	58	414/558	74	2/558	0	1
gene4253	NC_004605.1	1069624	1070757	-	protein_coding	VPA1016	.	1191711	.	NP_800526.1	multidrug resistance protein D	-2.09387	4.38872	0.00111828	0.00733455	3.83553	4.84992	4.84992	3.83553	84	51	21.7428	13.2176	1134	1	1123	99.03	UNIPROTKB|Q9KMQ3 - symbol:VC_A0267 "Multidrug resistance protein D" species:243277 "Vibrio cholerae O1 biovar El Tor str. N16961" [GO:0006855 "drug transmembrane transport" evidence=ISS] [GO:0042493 "response to drug" evidence=ISS] InterPro:IPR011701 Pfam:PF07690 GO:GO:0016021 GO:GO:0042493 Proteomes:UP000000584 GO:GO:0006855 CDD:cd06174 InterPro:IPR020846 InterPro:IPR036259 SUPFAM:SSF103473 EMBL…	379	1	374	98.68	475.7	8e-133	239/374	63	295/374	78	0/374	0	1
gene4257	NC_004605.1	1072830	1073354	-	protein_coding	VPA1020	.	1191715	.	NP_800530.1	hypothetical protein	-3.49481	1.77688	0.0250426	0.095989	1.20263	2.49562	2.49562	1.20263	14	5	7.82739	2.79901	525	1	520	99.05	UNIPROTKB|Q81PK8 - symbol:GBAA_2794 "Pology Modulation protein" species:1392 "Bacillus anthracis" [GO:0003677 "DNA binding" evidence=ISS] [GO:0006355 "regulation of transcription, DNA-templated" evidence=ISS] InterPro:IPR027417 SUPFAM:SSF52540 GO:GO:0006355 EMBL:AE017334 Proteomes:UP000000594 GO:GO:0003677 eggNOG:COG0563 HOGENOM:HOG000242426 RefSeq:WP_000720568.1 STRING:260799.BAS2605 DNASU:10872…	172	1	166	96.51	94	3e-18	61/174	35	88/174	50	9/174	5	1
gene4264	NC_004605.1	1081544	1082023	-	protein_coding	VPA1027	.	1191722	.	NP_800537.1	hypothetical protein	-2.9036	4.43886	3.86703e-06	4.67899e-05	3.57692	5.03629	5.03629	3.57692	96	42	58.7054	25.7159	480	1	406	84.58	UNIPROTKB|Q48C23 - symbol:PSPPH_4985 "Uncharacterized protein" species:264730 "Pseudomonas savastanoi pv. phaseolicola 1448A" [GO:0003674 "molecular_function" evidence=ND] [GO:0005575 "cellular_component" evidence=ND] [GO:0008150 "biological_process" evidence=ND] EMBL:CP000058 Proteomes:UP000000551 Gene3D:2.30.110.20 InterPro:IPR036624 InterPro:IPR008514 Pfam:PF05638 SUPFAM:SSF141452 TIGRFAMs:TIG…	166	1	140	84.34	55.5	1e-06	38/140	27	66/140	47	5/140	3	1
gene4280	NC_004605.1	1101720	1102916	-	protein_coding	VPA1043	.	1191738	.	NP_800553.1	hypothetical protein	-2.07094	4.98064	0.000344884	0.00268264	4.4131	5.42925	5.42925	4.4131	127	78	31.1428	19.1511	1197	1	1174	98.08	UNIPROTKB|Q4K3P0 - symbol:fha "Type VI secretion protein Fha" species:220664 "Pseudomonas protegens Pf-5" [GO:0033103 "protein secretion by the type VI secretion system" evidence=ISM] InterPro:IPR000253 InterPro:IPR008984 Pfam:PF00498 PROSITE:PS50006 SMART:SM00240 CDD:cd00060 SUPFAM:SSF49879 EMBL:CP000076 Proteomes:UP000008540 OrthoDB:POG091H09TV eggNOG:COG3456 InterPro:IPR017735 TIGRFAMs:TIGR033…	494	1	485	98.18	133.7	8e-30	119/491	24	206/491	41	106/491	21	1
gene4292	NC_004605.1	1112013	1114532	-	protein_coding	VPA1055	.	1191750	.	NP_800565.1	nitrite reductase	2.44419	4.33884	0.000172356	0.00145237	4.83762	3.61682	3.61682	4.83762	34	106	3.96029	12.3623	2520	40	2509	98.02	UNIPROTKB|Q47UD7 - symbol:nirB "Nitrite reductase [NAD(P)H], large subunit" species:167879 "Colwellia psychrerythraea 34H" [GO:0008942 "nitrite reductase [NAD(P)H] activity" evidence=ISA] [GO:0042128 "nitrate assimilation" evidence=ISA] InterPro:IPR005117 InterPro:IPR006066 InterPro:IPR006067 InterPro:IPR012744 InterPro:IPR017121 InterPro:IPR023753 InterPro:IPR036136 Pfam:PF01077 Pfam:PF03460 Pfa…	866	11	844	96.3	997.7	1e-289	488/837	58	625/837	74	17/837	2	1
gene4304	NC_004605.1	1125446	1126702	+	protein_coding	VPA1067	.	1191762	.	NP_800577.1	serine transporter	-3.65108	6.46984	5.38477e-14	1.87452e-12	5.28563	7.12784	7.12784	5.28563	419	146	97.8424	34.1359	1257	1	1252	99.6	UNIPROTKB|Q9KRI3 - symbol:VC_1658 "Serine transporter" species:243277 "Vibrio cholerae O1 biovar El Tor str. N16961" [GO:0015194 "L-serine transmembrane transporter activity" evidence=ISS] [GO:0015825 "L-serine transport" evidence=ISS] InterPro:IPR018227 Pfam:PF03222 GO:GO:0016021 EMBL:AE003852 Proteomes:UP000000584 GO:GO:0015194 GO:GO:0015825 eggNOG:COG0814 eggNOG:ENOG4105C44 KO:K03837 PIR:D8217…	417	1	416	99.76	600.9	2e-170	299/417	71	360/417	86	1/417	0	1
gene4305	NC_004605.1	1126811	1126909	-	protein_coding	VPA1068	.	1191763	.	NP_800578.1	hypothetical protein	-7.44904	8.60535	6.33445e-36	9.608e-34	6.54152	9.42559	9.42559	6.54152	2072	354	6143.32	1050.9	99				No hit
gene4324	NC_004605.1	1146833	1147252	-	protein_coding	VPA1087	.	1191782	.	NP_800597.1	D-ribose pyranase	5.59188	2.03967	0.00268218	0.0152086	2.74996	0.995829	0.995829	2.74996	3	22	2.09662	15.3946	420	1	418	99.52	UNIPROTKB|Q9KN38 - symbol:rbsD "D-ribose pyranase" species:243277 "Vibrio cholerae O1 biovar El Tor str. N16961" [GO:0015611 "D-ribose-importing ATPase activity" evidence=ISS] [GO:0015752 "D-ribose transmembrane transport" evidence=ISS] HAMAP:MF_01661 InterPro:IPR007721 InterPro:IPR023064 InterPro:IPR023750 Pfam:PF05025 UniPathway:UPA00916 GO:GO:0005737 Proteomes:UP000000584 GO:GO:0048029 EMBL:AE…	139	1	139	100	226.5	3e-58	114/139	82	124/139	89	0/139	0	1
gene4359	NC_004605.1	1183319	1184473	-	protein_coding	VPA1121	.	1191817	.	NP_800631.1	acyl-CoA dehydrogenase	2.07894	5.56219	9.73159e-05	0.000870253	5.99404	4.96154	4.96154	5.99404	91	241	23.1264	61.3238	1155	1	1141	98.79	UNIPROTKB|Q8EGC5 - symbol:ivdC "2-methylbutanoyl-CoA dehydrogenase IvdC" species:211586 "Shewanella oneidensis MR-1" [GO:0000062 "fatty-acyl-CoA binding" evidence=IBA] [GO:0003995 "acyl-CoA dehydrogenase activity" evidence=ISS;IBA] [GO:0009055 "electron transfer activity" evidence=IBA] [GO:0009062 "fatty acid catabolic process" evidence=ISS] [GO:0033539 "fatty acid beta-oxidation using acyl-CoA d…	385	1	380	98.7	535	1e-150	264/380	69	309/380	81	0/380	0	1
gene4364	NC_004605.1	1189213	1190820	+	protein_coding	VPA1126	.	1191822	.	NP_800636.1	acyl-CoA carboxyltransferase beta chain	2.03424	6.73356	1.56092e-05	0.000167405	7.15595	6.14151	6.14151	7.15595	210	544	38.3338	99.4276	1608	1	1606	99.88	UNIPROTKB|Q8EFS0 - symbol:liuB "Methylcrotonyl-CoA carboxylase carboxyl transferase subunit LiuB" species:211586 "Shewanella oneidensis MR-1" [GO:0004658 "propionyl-CoA carboxylase activity" evidence=ISS] InterPro:IPR011763 PROSITE:PS50989 InterPro:IPR011762 Pfam:PF01039 EMBL:AE014299 Proteomes:UP000008186 GO:GO:0016740 eggNOG:COG4799 InterPro:IPR034733 InterPro:IPR029045 SUPFAM:SSF52096 PROSITE:…	535	1	535	100	818.1	9e-236	399/535	74	455/535	85	0/535	0	1
gene4366	NC_004605.1	1191662	1193776	+	protein_coding	VPA1128	.	1191824	.	NP_800638.1	acyl-CoA carboxylase alpha chain	7.88329	1.19553	0.0139512	0.0601329	1.9499	0.412954	0.412954	1.9499	1	11	0.138784	1.52854	2115	40	2047	94.94	UNIPROTKB|Q485C3 - symbol:mccA "Methylcrotonyl-CoA carboxylase, alpha subunit" species:167879 "Colwellia psychrerythraea 34H" [GO:0004485 "methylcrotonoyl-CoA carboxylase activity" evidence=ISA] [GO:0006552 "leucine catabolic process" evidence=ISA] InterPro:IPR005479 InterPro:IPR011761 InterPro:IPR011764 InterPro:IPR013815 Pfam:PF02786 PROSITE:PS00866 PROSITE:PS00867 PROSITE:PS50975 PROSITE:PS509…	681	1	668	98.09	617.5	3e-175	338/679	49	449/679	66	21/679	3	1
gene4397	NC_004605.1	1224168	1225214	-	protein_coding	VPA1159	.	1191855	.	NP_800669.1	guanosine 5'-monophosphate oxidoreductase	-3.57603	9.11877	2.59088e-17	1.1462e-15	7.93	9.76425	9.76425	7.93	2621	933	734.799	261.896	1047	1	1042	99.52	UNIPROTKB|Q9KMW9 - symbol:guaC "GMP reductase" species:243277 "Vibrio cholerae O1 biovar El Tor str. N16961" [GO:0003920 "GMP reductase activity" evidence=ISS] [GO:0015949 "nucleobase-containing small molecule interconversion" evidence=ISS] HAMAP:MF_00596 InterPro:IPR001093 InterPro:IPR005993 InterPro:IPR013785 InterPro:IPR015875 Pfam:PF00478 PIRSF:PIRSF000235 PROSITE:PS00487 Gene3D:3.20.20.70 GO…	347	1	347	100	646.4	3e-184	319/347	91	335/347	96	0/347	0	1
gene4415	NC_004605.1	1245266	1246558	-	protein_coding	VPA1177	.	1191873	.	NP_800687.1	chitinase A	2.35051	3.87594	0.00159825	0.00990913	4.35922	3.21494	3.21494	4.35922	25	75	5.67531	17.0473	1293	58	1279	94.51	UNIPROTKB|Q9KND8 - symbol:VC_A0027 "Chitinase" species:243277 "Vibrio cholerae O1 biovar El Tor str. N16961" [GO:0004568 "chitinase activity" evidence=ISS;IBA] [GO:0005576 "extracellular region" evidence=IBA] [GO:0006032 "chitin catabolic process" evidence=ISS;IBA] [GO:0008061 "chitin binding" evidence=IBA] InterPro:IPR001223 InterPro:IPR001579 InterPro:IPR003610 InterPro:IPR011583 InterPro:IPR01…	849	157	585	50.53	258.1	3e-67	149/442	33	228/442	51	48/442	10	1
gene4422	NC_004605.1	1253136	1254314	-	protein_coding	VPA1184	.	1191880	.	NP_800694.1	drug transport transmembrane protein	-3.31575	6.10447	1.54277e-11	4.25463e-10	5.0338	6.73319	6.73319	5.0338	318	122	79.1702	30.4117	1179	13	1123	94.23	UNIPROTKB|Q5LRJ9 - symbol:SPO2128 "Transporter, putative" species:246200 "Ruegeria pomeroyi DSS-3" [GO:0005215 "transporter activity" evidence=ISS] [GO:0006810 "transport" evidence=ISS] InterPro:IPR011701 Pfam:PF07690 GO:GO:0016021 EMBL:CP000031 Proteomes:UP000001023 GO:GO:0006810 GO:GO:0055085 GO:GO:0005215 InterPro:IPR020846 InterPro:IPR036259 SUPFAM:SSF103473 PROSITE:PS50850 RefSeq:WP_01104785…	405	15	390	92.84	229.6	1e-58	135/376	35	205/376	54	6/376	1	1
gene4428	NC_004605.1	1260174	1263326	-	protein_coding	VPA1190	.	1191886	.	NP_800700.1	acriflavin resistence protein	2.36797	8.39361	1.10019e-08	2.10474e-07	8.88476	7.64513	7.64513	8.88476	601	1812	55.9498	168.899	3153	1	3145	99.75	TIGR_CMR|SPO_1397 - symbol:SPO_1397 "hydrophobe/amphiphile efflux-1 family protein" species:246200 "Ruegeria pomeroyi DSS-3" [GO:0042493 "response to drug" evidence=ISS] InterPro:IPR001036 InterPro:IPR004764 Pfam:PF00873 PRINTS:PR00702 GO:GO:0016021 GO:GO:0005886 EMBL:CP000031 Proteomes:UP000001023 GO:GO:0006810 GO:GO:0005215 eggNOG:ENOG4105BZS eggNOG:COG0841 HOGENOM:HOG000158129 Gene3D:3.30.2090…	1042	1	1042	100	969.5	5e-281	508/1052	48	719/1052	68	14/1052	1	1
gene4429	NC_004605.1	1263335	1264462	-	protein_coding	VPA1191	.	1191887	.	NP_800701.1	multidrug efflux membrane fusion protein	2.15075	7.00858	1.98515e-06	2.5167e-05	7.45674	6.36098	6.36098	7.45674	245	671	63.7537	174.827	1128	91	1099	89.45	TIGR_CMR|CPS_1536 - symbol:CPS_1536 "efflux transporter, MFP subunit, AcrA/E family" species:167879 "Colwellia psychrerythraea 34H" [GO:0006855 "drug transmembrane transport" evidence=ISS] InterPro:IPR006143 GO:GO:0005886 TIGRFAMs:TIGR01730 GO:GO:0055085 GO:GO:0005215 EMBL:CP000083 Proteomes:UP000000547 eggNOG:ENOG4105C1P eggNOG:ENOG410XNVN HOGENOM:HOG000158247 KO:K03585 OrthoDB:POG091H04V7 RefSe…	416	43	377	80.53	188.7	2e-46	122/336	36	183/336	54	1/336	0	1
gene4431	NC_004605.1	1265428	1266657	-	protein_coding	VPA1193	.	1191889	.	NP_800703.1	peptidase T	2.2067	6.36021	3.29227e-06	4.0179e-05	6.81936	5.69225	5.69225	6.81936	153	430	36.5119	102.744	1230	1	1216	98.86	UNIPROTKB|Q9KMY6 - symbol:pepT "Peptidase T" species:243277 "Vibrio cholerae O1 biovar El Tor str. N16961" [GO:0006508 "proteolysis" evidence=ISS] [GO:0008233 "peptidase activity" evidence=ISS] HAMAP:MF_00550 InterPro:IPR001261 InterPro:IPR002933 InterPro:IPR010161 Pfam:PF01546 PIRSF:PIRSF037215 PROSITE:PS00758 PROSITE:PS00759 InterPro:IPR011650 GO:GO:0005737 GO:GO:0008270 Proteomes:UP000000584 G…	410	1	405	98.78	607.4	2e-172	294/405	72	344/405	84	0/405	0	1
gene4432	NC_004605.1	1266949	1267812	-	protein_coding	VPA1194	.	1191890	.	NP_800704.1	hypothetical protein	-2.58997	3.53904	0.00131234	0.00844611	2.8575	4.10761	4.10761	2.8575	49	24	16.6468	8.16378	864	49	832	90.74	UNIPROTKB|Q8EDN2 - symbol:SO_2711 "Predicted lipoprotein" species:211586 "Shewanella oneidensis MR-1" [GO:0003674 "molecular_function" evidence=ND] [GO:0005575 "cellular_component" evidence=ND] [GO:0008150 "biological_process" evidence=ND] EMBL:AE014299 Proteomes:UP000008186 Gene3D:1.20.1260.10 InterPro:IPR012347 eggNOG:ENOG4105S75 eggNOG:ENOG4111UK4 OMA:WIANRAH OrthoDB:POG091H0S14 InterPro:IPR01…	290	5	268	91.03	129.4	1e-28	76/264	28	136/264	51	3/264	1	1
gene4444	NC_004605.1	1280656	1281276	+	protein_coding	VPA1206	.	1191902	.	NP_800716.1	hypothetical protein	-2.94038	2.34632	0.0173117	0.0714506	1.74108	2.99269	2.99269	1.74108	21	9	9.92604	4.25936	621	1	619	99.68	UNIPROTKB|Q9KQQ9 - symbol:VC_1939 "Uncharacterized protein" species:243277 "Vibrio cholerae O1 biovar El Tor str. N16961" [GO:0003674 "molecular_function" evidence=ND] [GO:0005575 "cellular_component" evidence=ND] [GO:0005886 "plasma membrane" evidence=IBA] [GO:0008150 "biological_process" evidence=ND] [GO:0042968 "homoserine transport" evidence=IBA] [GO:0042970 "homoserine transmembrane transpor…	206	1	206	100	310.8	2e-83	153/206	74	178/206	86	0/206	0	1
gene4455	NC_004605.1	1289874	1290911	-	protein_coding	VPA1217	.	1191913	.	NP_800727.1	hypothetical protein	2.41368	6.5317	1.87852e-07	2.92237e-06	7.02943	5.77316	5.77316	7.02943	162	498	45.8106	141.002	1038	1	1027	98.94	UNIPROTKB|Q8EA59 - symbol:SO_4050 "Putative DUF2955 domain transport system permease component" species:211586 "Shewanella oneidensis MR-1" [GO:0003674 "molecular_function" evidence=ND] [GO:0005575 "cellular_component" evidence=ND] [GO:0008150 "biological_process" evidence=ND] GO:GO:0016021 EMBL:AE014299 Proteomes:UP000008186 InterPro:IPR022604 Pfam:PF11168 RefSeq:NP_719580.1 RefSeq:WP_011073763.…	342	1	340	99.42	499.6	5e-140	254/345	73	286/345	82	8/345	2	1
gene4456	NC_004605.1	1290924	1291979	-	protein_coding	VPA1218	.	1191914	.	NP_800728.1	secretion protein	6.48001	6.16606	3.1961e-22	1.8343e-20	6.94964	4.31399	4.31399	6.94964	57	471	15.8438	131.084	1056	1	1054	99.81	UNIPROTKB|Q8EA58 - symbol:SO_4051 "Putative DUF2955 domain transport system MFP component" species:211586 "Shewanella oneidensis MR-1" [GO:0008565 "protein transporter activity" evidence=ISS] [GO:0009306 "protein secretion" evidence=ISS] [GO:0015546 "sulfathiazole transmembrane transporter activity" evidence=IBA] [GO:1902599 "sulfathiazole transmembrane transport" evidence=IBA] GO:GO:0016021 GO:G…	357	1	357	100	391	2e-107	204/357	57	260/357	72	6/357	1	1
gene4457	NC_004605.1	1292017	1292481	-	protein_coding	VPA1219	.	1191915	.	NP_800729.1	transcriptional regulator	3.0966	7.18546	3.62378e-12	1.05412e-10	7.77917	6.16169	6.16169	7.77917	213	840	134.454	530.909	465	10	457	96.34	UNIPROTKB|Q8EA57 - symbol:slyA "Transcriptional regulator SlyA" species:211586 "Shewanella oneidensis MR-1" [GO:0006355 "regulation of transcription, DNA-templated" evidence=IBA] [GO:0044212 "transcription regulatory region DNA binding" evidence=IBA] InterPro:IPR000835 Pfam:PF13463 PRINTS:PR00598 PROSITE:PS50995 SMART:SM00347 Prosite:PS01117 GO:GO:0006355 GO:GO:0003700 EMBL:AE014299 Proteomes:UP0…	157	1	149	94.9	172.6	6e-42	91/149	61	113/149	75	0/149	0	1
gene4460	NC_004605.1	1296709	1297029	-	protein_coding	VPA1222	.	1191918	.	NP_800732.1	hypothetical protein	2.0313	4.34854	0.00304304	0.0169382	4.77041	3.7996	3.7996	4.77041	39	101	35.6622	92.472	321	25	304	87.23	UNIPROTKB|Q9KLK4 - symbol:VC_A0739 "UPF0213 protein VC_A0739" species:243277 "Vibrio cholerae O1 biovar El Tor str. N16961" [GO:0003674 "molecular_function" evidence=ND] [GO:0005575 "cellular_component" evidence=ND] [GO:0008150 "biological_process" evidence=ND] InterPro:IPR000305 Pfam:PF01541 Proteomes:UP000000584 EMBL:AE003853 PROSITE:PS50164 Gene3D:3.40.1440.10 InterPro:IPR035901 SUPFAM:SSF8277…	101	11	101	90.1	97.4	2e-19	51/94	54	64/94	68	4/94	4	1
gene4476	NC_004605.1	1311665	1312378	+	protein_coding	VPA1238	.	1191934	.	NP_800748.1	hypothetical protein	2.67747	3.63204	0.000730758	0.00512134	4.16355	2.86726	2.86726	4.16355	19	65	7.81095	26.7553	714	70	679	85.43	ASPGD|ASPL0000109275 - symbol:Afu6g09200 species:746128 "Aspergillus fumigatus" [GO:0010181 "FMN binding" evidence=IEA] [GO:0055114 "oxidation-reduction process" evidence=IEA] [GO:0016491 "oxidoreductase activity" evidence=IEA] [GO:0005575 "cellular_component" evidence=ND] InterPro:IPR012349 Proteomes:UP000002530 EMBL:AAHF01000006 GO:GO:0048037 Gene3D:2.30.110.10 SUPFAM:SSF50475 KO:K07005 HOGENOM…	266	15	240	84.96	82	1e-14	58/228	25	116/228	50	27/228	11	1
gene4525	NC_004605.1	1365096	1366010	-	protein_coding	VPA1287	.	1191983	.	NP_800797.1	transporter	-2.06071	8.99515	8.99947e-07	1.22502e-05	8.38459	9.42559	9.42559	8.38459	2072	1280	664.687	411.133	915	13	904	97.49	UNIPROTKB|Q8EFD6 - symbol:SO_2045 "Cation efflux protein CDF family" species:211586 "Shewanella oneidensis MR-1" [GO:0005385 "zinc ion transmembrane transporter activity" evidence=IBA] [GO:0010043 "response to zinc ion" evidence=IBA] [GO:0016020 "membrane" evidence=IBA] [GO:0061088 "regulation of sequestering of zinc ion" evidence=IBA] InterPro:IPR002524 Pfam:PF01545 GO:GO:0016021 EMBL:AE014299 P…	394	24	381	90.86	294.7	2e-78	179/358	50	221/358	61	61/358	17	1
gene4635	NC_004605.1	1467767	1468252	+	protein_coding	VPA1397	.	1192093	.	NP_800907.1	acyl-CoA thioesterase	-2.00349	6.31014	4.18805e-05	0.000414607	5.74373	6.73319	6.73319	5.74373	318	202	192.061	122.154	486	1	484	99.59	UNIPROTKB|Q9KL09 - symbol:VC_A0941 "Acyl-CoA thioester hydrolase-related protein" species:243277 "Vibrio cholerae O1 biovar El Tor str. N16961" [GO:0006631 "fatty acid metabolic process" evidence=ISS] [GO:0016289 "CoA hydrolase activity" evidence=ISS] Pfam:PF03061 InterPro:IPR006683 GO:GO:0005829 InterPro:IPR029069 SUPFAM:SSF54637 Proteomes:UP000000584 GO:GO:0006631 GO:GO:0006637 GO:GO:0047617 EM…	162	1	161	99.38	291.6	9e-78	139/161	86	153/161	95	0/161	0	1
gene4641	NC_004605.1	1475072	1476472	+	protein_coding	VPA1403	.	1192099	.	NP_800913.1	capsular polysaccharide biosynthesis glycosyltransferase	3.38704	5.13407	6.70042e-09	1.32975e-07	5.75072	4.05104	4.05104	5.75072	47	203	9.84709	42.5845	1401	1	1399	99.86	UNIPROTKB|Q9KTG8 - symbol:VC_0934 "Capsular polysaccharide biosynthesis glycosyltransferase, putative" species:243277 "Vibrio cholerae O1 biovar El Tor str. N16961" [GO:0000271 "polysaccharide biosynthetic process" evidence=ISS] [GO:0016740 "transferase activity" evidence=ISS] Pfam:PF02397 GO:GO:0016021 InterPro:IPR036291 SUPFAM:SSF51735 EMBL:AE003852 Proteomes:UP000000584 GO:GO:0016740 GO:GO:000…	465	2	465	99.78	535.8	8e-151	255/466	54	334/466	71	2/466	0	1
gene4643	NC_004605.1	1477701	1478234	+	protein_coding	VPA1405	.	1192101	.	NP_800915.1	hypothetical protein	2.60359	2.98969	0.00691861	0.0338128	3.51256	2.31525	2.31525	3.51256	12	40	6.59612	22.0147	534	28	532	94.57	UNIPROTKB|Q9KTG6 - symbol:VC_0936 "Polysaccharide export-related protein" species:243277 "Vibrio cholerae O1 biovar El Tor str. N16961" [GO:0003674 "molecular_function" evidence=ND] [GO:0005575 "cellular_component" evidence=ND] [GO:0008150 "biological_process" evidence=ND] InterPro:IPR003715 Pfam:PF02563 GO:GO:0016020 EMBL:AE003852 Proteomes:UP000000584 InterPro:IPR019554 Pfam:PF10531 eggNOG:COG1…	175	10	175	94.86	128.3	1e-28	71/170	41	107/170	62	6/170	3	1
gene4644	NC_004605.1	1478234	1480018	+	protein_coding	VPA1406	.	1192102	.	NP_800916.1	hypothetical protein	2.60434	5.39558	9.83394e-07	1.33434e-05	5.92154	4.57696	4.57696	5.92154	69	229	11.3464	37.7043	1785	43	1642	89.64	UNIPROTKB|Q9KTG5 - symbol:VC_0937 "Exopolysaccharide biosynthesis protein, putative" species:243277 "Vibrio cholerae O1 biovar El Tor str. N16961" [GO:0000271 "polysaccharide biosynthetic process" evidence=ISS] [GO:0003674 "molecular_function" evidence=ND] InterPro:IPR003856 InterPro:IPR005702 Pfam:PF02706 InterPro:IPR027417 SUPFAM:SSF52540 GO:GO:0016021 EMBL:AE003852 Proteomes:UP000000584 GO:GO:…	737	5	540	72.73	302	2e-80	180/541	33	286/541	52	13/541	2	1
gene4645	NC_004605.1	1480319	1481221	+	protein_coding	VPA1407	.	1192103	.	NP_800917.1	hypothetical protein	2.58628	4.22256	0.00013009	0.00112753	4.74262	3.45184	3.45184	4.74262	30	99	9.75173	32.2212	903				No hit
gene4648	NC_004605.1	1483490	1484323	+	protein_coding	VPA1410	.	1192106	.	NP_800920.1	hypothetical protein	2.68166	4.06214	0.000120611	0.00105616	4.59504	3.26553	3.26553	4.59504	26	89	9.15073	31.363	834				No hit
gene4656	NC_004605.1	1490301	1491740	+	protein_coding	VPA1418	.	1192114	.	NP_800928.1	catalase	2.19421	5.97205	1.16541e-05	0.000128559	6.42834	5.31378	5.31378	6.42834	117	327	23.8491	66.7389	1440	10	1432	98.82	UNIPROTKB|Q481W1 - symbol:CPS_2441 "Catalase" species:167879 "Colwellia psychrerythraea 34H" [GO:0004096 "catalase activity" evidence=ISM] [GO:0006979 "response to oxidative stress" evidence=ISM] InterPro:IPR002226 InterPro:IPR011614 InterPro:IPR018028 InterPro:IPR020835 InterPro:IPR024708 InterPro:IPR024711 InterPro:IPR037060 Pfam:PF00199 PIRSF:PIRSF038928 PRINTS:PR00067 PROSITE:PS00437 PROSITE:…	481	3	476	98.54	815.8	4e-235	378/474	79	428/474	90	0/474	0	1
gene4659	NC_004605.1	1495063	1495365	+	protein_coding	VPA1421	.	1192117	.	NP_800931.1	PTS system fructose-specific transporter subunit IIB	2.2723	4.45705	0.000424834	0.00321044	4.92675	3.7996	3.7996	4.92675	39	113	37.7807	109.605	303	1	298	98.35	UNIPROTKB|Q9KR24 - symbol:VC_1823 "PTS system, fructose-specific IIB component" species:243277 "Vibrio cholerae O1 biovar El Tor str. N16961" [GO:0009401 "phosphoenolpyruvate-dependent sugar phosphotransferase system" evidence=ISS] [GO:0015755 "fructose transmembrane transport" evidence=ISS] InterPro:IPR003353 InterPro:IPR003501 InterPro:IPR013011 InterPro:IPR036095 Pfam:PF02302 PROSITE:PS51099 G…	99	1	99	100	168.7	5e-41	82/99	82	92/99	92	0/99	0	1
gene4660	NC_004605.1	1495374	1496150	+	protein_coding	VPA1422	.	1192118	.	NP_800932.1	PTS system nitrogen regulatory subunit IIA	2.91207	3.64476	0.000260181	0.0020654	4.20486	2.8002	2.8002	4.20486	18	67	6.79986	25.3424	777	1	772	99.36	UNIPROTKB|Q9KR23 - symbol:VC_1824 "PTS system, nitrogen regulatory IIA component, putative" species:243277 "Vibrio cholerae O1 biovar El Tor str. N16961" [GO:0006807 "nitrogen compound metabolic process" evidence=ISS] [GO:0008982 "protein-N(PI)-phosphohistidine-sugar phosphotransferase activity" evidence=ISS] [GO:0009401 "phosphoenolpyruvate-dependent sugar phosphotransferase system" evidence=ISS…	259	2	258	99.23	427.9	1e-118	206/257	80	237/257	92	0/257	0	1
gene4661	NC_004605.1	1496185	1497027	-	protein_coding	VPA1423	.	1192119	.	NP_800933.1	transcriptional regulator	3.12156	5.13239	4.62549e-08	7.95322e-07	5.72255	4.13508	4.13508	5.72255	50	199	17.4097	69.3776	843	1	841	99.76	UNIPROTKB|Q9KR22 - symbol:VC_1825 "Transcriptional regulator" species:243277 "Vibrio cholerae O1 biovar El Tor str. N16961" [GO:0000987 "proximal promoter sequence-specific DNA binding" evidence=IBA] [GO:0003700 "DNA binding transcription factor activity" evidence=ISS;IBA] [GO:0005829 "cytosol" evidence=IBA] [GO:0006355 "regulation of transcription, DNA-templated" evidence=ISS;IBA] [GO:0019172 "g…	279	1	279	100	517.3	2e-145	252/280	90	266/280	95	1/280	0	1
gene4666	NC_004605.1	1502840	1503292	+	protein_coding	VPA1428	.	1192124	.	NP_800938.1	azurin	-2.37798	8.16486	1.08687e-08	2.08866e-07	7.41554	8.66055	8.66055	7.41554	1218	652	789.219	423.003	453	19	451	95.58	UNIPROTKB|Q8CVD5 - symbol:azu "Azurin" species:211586 "Shewanella oneidensis MR-1" [GO:0009055 "electron transfer activity" evidence=ISS] InterPro:IPR000923 Pfam:PF00127 GO:GO:0009055 EMBL:AE014299 Proteomes:UP000008186 GO:GO:0005507 GO:GO:0042597 Gene3D:2.60.40.420 InterPro:IPR008972 SUPFAM:SSF49503 eggNOG:COG3241 OMA:MGHNFVL OrthoDB:POG091H0LOW InterPro:IPR028871 PROSITE:PS00196 CDD:cd13922 Int…	158	13	157	91.77	177.6	2e-43	92/145	63	105/145	72	1/145	0	1
gene4672	NC_004605.1	1509953	1511779	-	protein_coding	VPA1434	.	1192130	.	NP_800944.1	hemolysin secretion ATP-binding protein	-3.65501	5.96967	1.03644e-12	3.14412e-11	4.79767	6.63077	6.63077	4.79767	296	103	47.5556	16.5689	1827	1	1825	99.89	UNIPROTKB|Q9KVE7 - symbol:VC_0199 "Hemolysin secretion ATP-binding protein, putative" species:243277 "Vibrio cholerae O1 biovar El Tor str. N16961" [GO:0005215 "transporter activity" evidence=ISS] [GO:0009405 "pathogenesis" evidence=ISS] [GO:0034040 "lipid-transporting ATPase activity" evidence=IBA] InterPro:IPR003439 InterPro:IPR011527 InterPro:IPR017871 InterPro:IPR036640 Pfam:PF00005 Pfam:PF00…	611	3	610	99.51	871.7	8e-252	429/608	70	511/608	84	0/608	0	1
gene4673	NC_004605.1	1511925	1514015	+	protein_coding	VPA1435	.	1192131	.	NP_800945.1	iron(III) compound receptor	-10.1678	7.76963	1.28587e-41	2.73055e-39	5.32364	8.63793	8.63793	5.32364	1199	150	168.311	21.0829	2091	31	2089	98.47	UNIPROTKB|Q9KVE6 - symbol:VC_0200 "Iron(III) compound receptor" species:243277 "Vibrio cholerae O1 biovar El Tor str. N16961" [GO:0004872 "receptor activity" evidence=ISS] [GO:0006826 "iron ion transport" evidence=ISS] [GO:0009279 "cell outer membrane" evidence=IBA] [GO:0015344 "siderophore uptake transmembrane transporter activity" evidence=IBA] InterPro:IPR010105 InterPro:IPR000531 InterPro:IPR…	718	32	718	95.68	943.7	2e-273	451/690	65	555/690	80	7/690	1	1
gene4682	NC_004605.1	1536750	1538480	-	protein_coding	VPA1444	.	1192140	.	NP_800954.1	transport protein	2.06604	5.87633	5.55614e-05	0.000532662	6.30551	5.27726	5.27726	6.30551	114	300	19.3311	50.9352	1731	13	1687	96.76	UNIPROTKB|Q2GL80 - symbol:APH_0256 "Uncharacterized protein" species:212042 "Anaplasma phagocytophilum str. HZ" [GO:0003674 "molecular_function" evidence=ND] [GO:0008150 "biological_process" evidence=ND] InterPro:IPR003439 InterPro:IPR010128 InterPro:IPR011527 InterPro:IPR017871 InterPro:IPR036640 Pfam:PF00005 Pfam:PF00664 PROSITE:PS00211 PROSITE:PS50893 PROSITE:PS50929 InterPro:IPR003593 InterPr…	995	4	562	56.18	415.6	1e-114	216/559	38	338/559	60	1/559	0	1
gene4687	NC_004605.1	1541405	1543321	-	protein_coding	VPA1449	.	1192145	.	NP_800959.1	methyl-accepting chemotaxis protein	-6.54948	8.30193	1.07843e-31	1.1171e-29	6.40193	9.09932	9.09932	6.40193	1652	321	252.951	49.2127	1917	1	1654	86.28	UNIPROTKB|Q9KMZ0 - symbol:VC_A0176 "Methyl-accepting chemotaxis protein" species:243277 "Vibrio cholerae O1 biovar El Tor str. N16961" [GO:0004871 "signal transducer activity" evidence=ISS] [GO:0004872 "receptor activity" evidence=ISS] [GO:0006935 "chemotaxis" evidence=ISS] InterPro:IPR003660 InterPro:IPR004089 InterPro:IPR004090 Pfam:PF00015 Pfam:PF00672 PRINTS:PR00260 PROSITE:PS50111 PROSITE:PS…	644	7	557	85.56	575.5	1e-162	345/551	62	421/551	76	0/551	0	1
gene4696	NC_004605.1	1553076	1553825	-	protein_coding	VPA1458	.	1192154	.	NP_800968.1	phosphate ABC transporter ATP-binding protein	-2.47964	5.96308	3.25729e-07	4.83168e-06	5.19627	6.48359	6.48359	5.19627	267	137	104.496	53.685	750	7	748	98.93	UNIPROTKB|Q9KN92 - symbol:pstB2 "Phosphate import ATP-binding protein PstB 2" species:243277 "Vibrio cholerae O1 biovar El Tor str. N16961" [GO:0006817 "phosphate ion transport" evidence=ISS] [GO:0015415 "ATPase-coupled phosphate ion transmembrane transporter activity" evidence=ISS] InterPro:IPR003439 InterPro:IPR005670 InterPro:IPR015850 InterPro:IPR017871 Pfam:PF00005 PROSITE:PS00211 PROSITE:PS…	251	5	251	98.41	473	3e-132	233/247	94	243/247	98	0/247	0	1
gene4697	NC_004605.1	1553886	1554749	-	protein_coding	VPA1459	.	1192155	.	NP_800969.1	phosphate ABC transporter permease	-3.19217	4.28093	1.60479e-06	2.08426e-05	3.33787	4.91476	4.91476	3.33787	88	35	29.8963	11.9055	864	1	862	99.77	UNIPROTKB|Q9KN93 - symbol:VC_A0072 "Phosphate transport system permease protein PstA" species:243277 "Vibrio cholerae O1 biovar El Tor str. N16961" [GO:0005887 "integral component of plasma membrane" evidence=IBA] [GO:0006817 "phosphate ion transport" evidence=ISS] [GO:0015415 "ATPase-coupled phosphate ion transmembrane transporter activity" evidence=ISS;IBA] InterPro:IPR000515 InterPro:IPR005672…	289	3	289	99.31	528.9	6e-149	267/287	93	278/287	96	0/287	0	1
gene4698	NC_004605.1	1554772	1555704	-	protein_coding	VPA1460	.	1192156	.	NP_800970.1	phosphate ABC transporter permease	-5.51922	6.22651	1.85562e-20	9.49494e-19	4.57941	6.99546	6.99546	4.57941	382	88	120.179	27.7201	933	1	931	99.79	UNIPROTKB|Q9KN94 - symbol:VC_A0071 "Phosphate transport system permease protein" species:243277 "Vibrio cholerae O1 biovar El Tor str. N16961" [GO:0005887 "integral component of plasma membrane" evidence=IBA] [GO:0006817 "phosphate ion transport" evidence=ISS] [GO:0015415 "ATPase-coupled phosphate ion transmembrane transporter activity" evidence=ISS;IBA] InterPro:IPR000515 InterPro:IPR011864 Pfam…	327	22	327	93.58	531.9	7e-150	280/310	90	296/310	95	4/310	1	1
gene4699	NC_004605.1	1555804	1556625	-	protein_coding	VPA1461	.	1192157	.	NP_800971.1	phosphate ABC transporter periplasmic phosphate-binding protein	-13.0069	9.51065	2.00355e-55	2.12727e-52	6.71598	10.4049	10.4049	6.71598	4088	400	1459.78	143.015	822	1	820	99.76	UNIPROTKB|Q9KN95 - symbol:VC_A0070 "Phosphate ABC transporter, periplasmic phosphate-binding protein" species:243277 "Vibrio cholerae O1 biovar El Tor str. N16961" [GO:0005886 "plasma membrane" evidence=IBA] [GO:0006817 "phosphate ion transport" evidence=ISS;IBA] [GO:0015415 "ATPase-coupled phosphate ion transmembrane transporter activity" evidence=ISS;IBA] [GO:0016036 "cellular response to phosp…	299	27	299	91.3	440.3	3e-122	222/273	81	251/273	91	0/273	0	1
gene4705	NC_004605.1	1565180	1567180	-	protein_coding	VPA1467	.	1192163	.	NP_800977.1	protease II	-3.18578	5.89896	1.87177e-10	4.46597e-09	4.87649	6.5153	6.5153	4.87649	273	109	40.0464	16.0093	2001	1	1999	99.9	UNIPROTKB|Q9KNA2 - symbol:VC_A0063 "Protease II" species:243277 "Vibrio cholerae O1 biovar El Tor str. N16961" [GO:0004252 "serine-type endopeptidase activity" evidence=IBA] [GO:0005737 "cytoplasm" evidence=IBA] [GO:0006508 "proteolysis" evidence=ISS;IBA] [GO:0008233 "peptidase activity" evidence=ISS] InterPro:IPR001375 InterPro:IPR002470 InterPro:IPR023302 Pfam:PF00326 Pfam:PF02897 PRINTS:PR0086…	665	1	665	100	555.8	1e-156	293/670	43	403/670	60	9/670	1	1
gene4722	NC_004605.1	1584962	1586143	-	protein_coding	VPA1484	.	1192180	.	NP_800994.1	hypothetical protein	-3.04399	3.75862	3.71948e-05	0.000370812	2.90841	4.38436	4.38436	2.90841	60	25	14.8999	6.21608	1182	22	1123	93.23	UNIPROTKB|Q47Y51 - symbol:CPS_3601 "Putative membrane protein" species:167879 "Colwellia psychrerythraea 34H" [GO:0005215 "transporter activity" evidence=ISM] [GO:0005887 "integral component of plasma membrane" evidence=ISM] [GO:0006810 "transport" evidence=ISM] InterPro:IPR011701 Pfam:PF07690 GO:GO:0016021 GO:GO:0055085 CDD:cd06174 InterPro:IPR020846 InterPro:IPR036259 SUPFAM:SSF103473 EMBL:CP00…	401	20	386	91.52	444.5	2e-123	219/367	59	282/367	76	0/367	0	1
gene4724	NC_004605.1	1587200	1587970	-	protein_coding	VPA1486	.	1192182	napG	NP_800996.1	quinol dehydrogenase periplasmic subunit	2.52357	5.78619	5.43072e-07	7.66255e-06	6.30076	4.99191	4.99191	6.30076	93	299	35.406	113.975	771	4	742	95.85	UNIPROTKB|P44652 - symbol:napG "Ferredoxin-type protein NapG homolog" species:71421 "Haemophilus influenzae Rd KW20" [GO:0005886 "plasma membrane" evidence=IBA] InterPro:IPR017896 Prosite:PS00198 GO:GO:0005886 GO:GO:0055114 GO:GO:0046872 EMBL:L42023 Proteomes:UP000000579 GO:GO:0051539 InterPro:IPR017900 PROSITE:PS51379 Pfam:PF12838 InterPro:IPR019546 TIGRFAMs:TIGR01409 eggNOG:COG1145 Pfam:PF12800…	279	10	259	89.61	316.6	4e-85	154/252	61	184/252	73	8/252	3	1
gene4731	NC_004605.1	1593037	1595397	-	protein_coding	VPA1493	.	1192189	.	NP_801003.1	ATP-dependent protease LA-like protein	2.29078	7.62738	9.63198e-08	1.5554e-06	8.10388	6.91455	6.91455	8.10388	361	1053	44.8807	131.077	2361	1	2359	99.92	UNIPROTKB|Q9KKX5 - symbol:VC_A0975 "ATP-dependent protease LA-related protein" species:243277 "Vibrio cholerae O1 biovar El Tor str. N16961" [GO:0003674 "molecular_function" evidence=ND] [GO:0003697 "single-stranded DNA binding" evidence=IBA] [GO:0004176 "ATP-dependent peptidase activity" evidence=IBA] [GO:0005575 "cellular_component" evidence=ND] [GO:0005737 "cytoplasm" evidence=IBA] [GO:0006515…	786	1	786	100	1310.4	0	647/786	82	726/786	92	0/786	0	1
gene4732	NC_004605.1	1595585	1596082	+	protein_coding	VPA1494	.	1192190	.	NP_801004.1	hypothetical protein	-8.11742	6.62478	4.05823e-30	3.83007e-28	4.49865	7.46472	7.46472	4.49865	530	83	312.388	48.9827	498	1	484	97.19	UNIPROTKB|Q9KKX4 - symbol:VC_A0976 "Uncharacterized protein" species:243277 "Vibrio cholerae O1 biovar El Tor str. N16961" [GO:0003674 "molecular_function" evidence=ND] [GO:0005575 "cellular_component" evidence=ND] [GO:0008150 "biological_process" evidence=ND] InterPro:IPR011990 GO:GO:0071281 Proteomes:UP000000584 Gene3D:1.25.40.10 EMBL:AE003853 PIR:A82393 RefSeq:NP_233360.1 RefSeq:WP_000422925.1…	164	1	161	98.17	172.2	8e-42	79/161	49	109/161	67	0/161	0	1
gene4733	NC_004605.1	1596172	1597803	+	protein_coding	VPA1495	.	1192191	.	NP_801005.1	ABC transporter ATP-binding protein	-13.2164	7.58986	2.23175e-47	9.47825e-45	4.81111	8.48886	8.48886	4.81111	1081	104	194.426	18.7287	1632	1	1609	98.59	UNIPROTKB|Q9KKX3 - symbol:VC_A0977 "ABC transporter, ATP-binding protein" species:243277 "Vibrio cholerae O1 biovar El Tor str. N16961" [GO:0006810 "transport" evidence=ISS] [GO:0042626 "ATPase activity, coupled to transmembrane movement of substances" evidence=ISS] InterPro:IPR003439 InterPro:IPR013563 InterPro:IPR017871 Pfam:PF00005 Pfam:PF08352 PROSITE:PS00211 PROSITE:PS50893 InterPro:IPR00359…	539	1	537	99.63	857.8	1e-247	435/537	81	490/537	91	1/537	0	1
gene4742	NC_004605.1	1608101	1610509	-	protein_coding	VPA1504	.	1192200	.	NP_801014.1	CsuD protein	-3.16135	8.05345	8.54219e-14	2.9257e-12	7.00624	8.65937	8.65937	7.00624	1217	490	148.287	59.7796	2409	16	2380	98.17	UNIPROTKB|Q4K9N3 - symbol:PFL_3950 "Putative type I pili usher protein CsuD" species:220664 "Pseudomonas protegens Pf-5" [GO:0009297 "pilus assembly" evidence=ISM] [GO:0015473 "fimbrial usher porin activity" evidence=ISM] InterPro:IPR000015 Pfam:PF00577 GO:GO:0016021 GO:GO:0009279 GO:GO:0006810 GO:GO:0005215 EMBL:CP000076 Proteomes:UP000008540 eggNOG:COG3188 KO:K07347 InterPro:IPR018030 InterPro:…	785	12	784	98.47	489.6	1e-136	296/795	37	443/795	55	29/795	3	1
gene4743	NC_004605.1	1610536	1611315	-	protein_coding	VPA1505	.	1192201	.	NP_801015.1	CsuC protein	-3.12711	5.32393	7.45623e-09	1.47287e-07	4.34081	5.9382	5.9382	4.34081	182	74	68.4897	27.8825	780	46	751	90.51	UNIPROTKB|Q4K9N2 - symbol:PFL_3951 "Putative type I pilus usher pathway chaperone CsuC" species:220664 "Pseudomonas protegens Pf-5" [GO:0003824 "catalytic activity" evidence=ISA] [GO:0009297 "pilus assembly" evidence=ISA] InterPro:IPR016147 Pfam:PF00345 Gene3D:2.60.40.10 InterPro:IPR013783 EMBL:CP000076 Proteomes:UP000008540 GO:GO:0071555 GO:GO:0030288 eggNOG:COG3121 InterPro:IPR008962 SUPFAM:SSF…	263	14	252	90.87	149.4	9e-35	82/241	34	131/241	54	8/241	3	1
gene4744	NC_004605.1	1611316	1611849	-	protein_coding	VPA1506	.	1192202	.	NP_801016.1	CsuB protein	-2.8032	5.74888	2.04538e-08	3.74427e-07	4.86365	6.31968	6.31968	4.86365	238	108	130.823	59.4397	534	58	532	88.95	UNIPROTKB|Q4K9N1 - symbol:PFL_3952 "Putative type I pilus protein CsuB" species:220664 "Pseudomonas protegens Pf-5" [GO:0003824 "catalytic activity" evidence=ISA] [GO:0009297 "pilus assembly" evidence=ISA] Pfam:PF05229 EMBL:CP000076 Proteomes:UP000008540 HOGENOM:HOG000219297 InterPro:IPR007893 SMART:SM00972 RefSeq:WP_011062239.1 STRING:220664.PFL_3952 EnsemblBacteria:AAY93216 KEGG:pfl:PFL_3952 PA…	166	21	166	87.95	88.6	1e-16	53/158	33	84/158	53	12/158	7	1
gene4745	NC_004605.1	1611853	1612398	-	protein_coding	VPA1507	.	1192203	.	NP_801017.1	CsuA protein	-2.65413	8.21241	1.34147e-10	3.29319e-09	7.3503	8.75322	8.75322	7.3503	1299	623	698.337	335.343	546	37	544	93.04	UNIPROTKB|Q4K9N0 - symbol:PFL_3953 "Putative type I pilus protein CsuA/B" species:220664 "Pseudomonas protegens Pf-5" [GO:0003824 "catalytic activity" evidence=ISA] [GO:0009297 "pilus assembly" evidence=ISA] Pfam:PF05229 EMBL:CP000076 Proteomes:UP000008540 eggNOG:COG5430 HOGENOM:HOG000219297 InterPro:IPR007893 SMART:SM00972 RefSeq:WP_011062240.1 STRING:220664.PFL_3953 EnsemblBacteria:AAY93217 KEG…	178	11	178	94.38	107.1	3e-22	63/172	36	98/172	56	7/172	4	1
gene4752	NC_004605.1	1620670	1621185	+	protein_coding	VPA1514	.	1192210	.	NP_801024.1	superoxide dismutase, Cu-Zn	-2.05756	6.58321	1.18871e-05	0.000130789	5.98814	7.01777	7.01777	5.98814	388	240	220.714	136.696	516	28	511	93.8	UNIPROTKB|Q9KRQ3 - symbol:VC_1583 "Superoxide dismutase [Cu-Zn]" species:243277 "Vibrio cholerae O1 biovar El Tor str. N16961" [GO:0004784 "superoxide dismutase activity" evidence=IBA] [GO:0005507 "copper ion binding" evidence=IBA] [GO:0008270 "zinc ion binding" evidence=IBA] [GO:0019430 "removal of superoxide radicals" evidence=IBA] [GO:0042597 "periplasmic space" evidence=IBA] InterPro:IPR00142…	171	8	169	94.74	243.4	3e-63	112/163	68	136/163	83	3/163	1	1
gene4790	NC_004605.1	1653382	1653684	+	protein_coding	VPA1552	.	1192248	.	NP_801062.1	LafD protein	4.1471	1.28684	0.0443061	0.147121	1.9499	0.73363	0.73363	1.9499	2	11	1.93747	10.6695	303				No hit
gene4805	NC_004605.1	1663134	1665557	-	protein_coding	VPA1567	.	1192263	.	NP_801077.1	pyruvate formate lyase	2.52385	5.16607	5.38272e-06	6.29763e-05	5.67923	4.38436	4.38436	5.67923	60	193	7.26552	23.4002	2424	1	2422	99.92	UNIPROTKB|Q8ZQM6 - symbol:pflF "Putative pyruvate formate lyase" species:99287 "Salmonella enterica subsp. enterica serovar Typhimurium str. LT2" [GO:0005829 "cytosol" evidence=IBA] [GO:0016407 "acetyltransferase activity" evidence=IBA] InterPro:IPR001150 InterPro:IPR004184 Pfam:PF01228 Pfam:PF02901 PROSITE:PS51149 PROSITE:PS51554 GO:GO:0016829 GO:GO:0008152 EMBL:AE006468 Proteomes:UP000001014 eg…	810	4	810	99.63	1161.7	0	574/808	71	677/808	83	2/808	0	1
gene4806	NC_004605.1	1665560	1666489	-	protein_coding	VPA1568	.	1192264	.	NP_801078.1	pyruvate formate-lyase 3 activating enzyme	3.5736	4.19769	8.29435e-07	1.14743e-05	4.82442	3.10809	3.10809	4.82442	23	105	7.25927	33.1818	930	1	898	96.56	UNIPROTKB|P75794 - symbol:ybiY "putative pyruvate formate-lyase activating enzyme" species:83333 "Escherichia coli K-12" [GO:0003824 "catalytic activity" evidence=IEA] [GO:0055114 "oxidation-reduction process" evidence=IEA] [GO:0051539 "4 iron, 4 sulfur cluster binding" evidence=IEA] [GO:0051536 "iron-sulfur cluster binding" evidence=IEA] [GO:0046872 "metal ion binding" evidence=IEA] [GO:0043365 …	299	1	290	96.99	314.3	2e-84	146/299	48	200/299	66	9/299	3	1
gene4811	NC_004605.1	1670088	1670558	-	protein_coding	VPA1573	.	1192269	.	NP_801083.1	hypothetical protein	2.13135	3.33548	0.0165779	0.0690935	3.78194	2.8002	2.8002	3.78194	18	49	11.2176	30.5752	471	4	469	98.94	UNIPROTKB|Q81PQ7 - symbol:GBAA_2744 "Acetyltransferase" species:1392 "Bacillus anthracis" [GO:0008150 "biological_process" evidence=ND] InterPro:IPR000182 Pfam:PF00583 PROSITE:PS51186 EMBL:AE017334 Proteomes:UP000000594 GO:GO:0008080 InterPro:IPR016181 SUPFAM:SSF55729 HOGENOM:HOG000091699 RefSeq:WP_001020871.1 ProteinModelPortal:Q81PQ7 STRING:260799.BAS2558 DNASU:1086725 EnsemblBacteria:AAT31859 …	165	8	163	94.55	62.8	6e-09	46/158	29	79/158	50	5/158	3	1
gene4848	NC_004605.1	1709635	1710009	-	protein_coding	VPA1610	.	1192306	.	NP_801120.1	hypothetical protein	-6.36783	7.74812	2.27595e-29	1.97264e-27	5.89023	8.54113	8.54113	5.89023	1121	224	877.45	175.554	375	145	361	57.87	UNIPROTKB|Q0BXI7 - symbol:HNE_3130 "Uncharacterized protein" species:228405 "Hyphomonas neptunium ATCC 15444" [GO:0003674 "molecular_function" evidence=ND] [GO:0005575 "cellular_component" evidence=ND] [GO:0008150 "biological_process" evidence=ND] EMBL:CP000158 Proteomes:UP000001959 InterPro:IPR010652 Pfam:PF06803 OrthoDB:POG091H029B eggNOG:COG3339 eggNOG:ENOG4105WBM HOGENOM:HOG000273398 InterPro…	133	53	124	54.14	69.3	5e-11	34/72	47	47/72	65	0/72	0	1
gene4857	NC_004605.1	1719663	1721843	-	protein_coding	VPA1619	.	1192315	malQ	NP_801129.1	4-alpha-glucanotransferase	-2.60479	8.70209	1.6126e-10	3.86932e-09	7.85736	9.23483	9.23483	7.85736	1815	887	244.269	119.526	2181	1	2173	99.63	UNIPROTKB|Q9KNF0 - symbol:VC_A0014 "4-alpha-glucanotransferase" species:243277 "Vibrio cholerae O1 biovar El Tor str. N16961" [GO:0004134 "4-alpha-glucanotransferase activity" evidence=ISS] [GO:0005980 "glycogen catabolic process" evidence=ISS] InterPro:IPR003385 Pfam:PF02446 InterPro:IPR017853 SUPFAM:SSF51445 Proteomes:UP000000584 EMBL:AE003853 GO:GO:0005980 CAZy:GH77 eggNOG:COG1640 KO:K00705 GO…	726	1	724	99.72	1266.5	0	604/724	83	666/724	91	0/724	0	1
gene4858	NC_004605.1	1721961	1724414	-	protein_coding	VPA1620	.	1192316	.	NP_801130.1	maltodextrin phosphorylase	-2.42784	8.67596	2.88309e-09	6.03177e-08	7.90358	9.17984	9.17984	7.90358	1747	916	208.962	109.702	2454	1	2452	99.92	UNIPROTKB|Q9KNF1 - symbol:VC_A0013 "Alpha-1,4 glucan phosphorylase" species:243277 "Vibrio cholerae O1 biovar El Tor str. N16961" [GO:0004645 "phosphorylase activity" evidence=ISS] [GO:0005737 "cytoplasm" evidence=IBA] [GO:0005975 "carbohydrate metabolic process" evidence=ISS] [GO:0005980 "glycogen catabolic process" evidence=IBA] [GO:0008184 "glycogen phosphorylase activity" evidence=IBA] [GO:00…	817	1	817	100	1444.9	0	701/817	85	762/817	93	0/817	0	1
gene4859	NC_004605.1	1724666	1724902	-	protein_coding	VPA1621	.	1192317	.	NP_801131.1	hypothetical protein	2.20162	2.71519	0.0444493	0.147481	3.18107	2.21583	2.21583	3.18107	11	31	13.6236	38.4421	237				No hit
gene4863	NC_004605.1	1729630	1730055	+	protein_coding	VPA1625	.	1192321	.	NP_801135.1	hypothetical protein	7.88329	1.19553	0.0139512	0.0601329	1.9499	0.412954	0.412954	1.9499	1	11	0.689031	7.58887	426	1	424	99.53	UNIPROTKB|Q9KNC6 - symbol:VC_A0039 "Uncharacterized protein" species:243277 "Vibrio cholerae O1 biovar El Tor str. N16961" [GO:0003674 "molecular_function" evidence=ND] [GO:0005575 "cellular_component" evidence=ND] [GO:0008150 "biological_process" evidence=ND] Proteomes:UP000000584 EMBL:AE003853 PIR:E82509 RefSeq:NP_232440.1 RefSeq:WP_001882917.1 STRING:243277.VCA0039 DNASU:2612422 EnsemblBacteri…	140	2	140	99.29	140.2	3e-32	70/141	49	93/141	65	2/141	1	1
gene4867	NC_004605.1	1731917	1732993	+	protein_coding	VPA1629	.	1192325	.	NP_801139.1	ribosome-associated GTPase	-2.00382	8.07338	4.18119e-06	4.98807e-05	7.49264	8.49152	8.49152	7.49264	1083	688	295.162	187.744	1077	46	1066	94.8	TIGR_CMR|SPO_2565 - symbol:SPO_2565 "GTPase, putative" species:246200 "Ruegeria pomeroyi DSS-3" [GO:0005525 "GTP binding" evidence=ISS] [GO:0008152 "metabolic process" evidence=ISS] HAMAP:MF_01820 InterPro:IPR004881 InterPro:IPR010914 InterPro:IPR030378 Pfam:PF03193 PROSITE:PS50936 PROSITE:PS51721 InterPro:IPR027417 GO:GO:0005525 SUPFAM:SSF52540 GO:GO:0005737 EMBL:CP000031 Proteomes:UP000001023 G…	360	23	360	93.89	313.9	4e-84	160/344	46	227/344	65	10/344	2	1
gene4874	NC_004605.1	1740603	1741151	-	protein_coding	VPA1636	.	1192332	.	NP_801146.1	hypothetical protein	-2.37006	3.76249	0.00155718	0.00968865	3.13906	4.28975	4.28975	3.13906	56	30	29.9408	16.0599	549				No hit
gene4875	NC_004605.1	1741747	1742943	-	protein_coding	VPA1637	.	1192333	.	NP_801147.1	hypothetical protein	-5.51196	8.02923	1.61176e-26	1.26762e-24	6.34301	8.79149	8.79149	6.34301	1334	308	327.122	75.6224	1197	1	1048	87.55	UNIPROTKB|Q9KKS4 - symbol:VC_A1026 "Uncharacterized protein" species:243277 "Vibrio cholerae O1 biovar El Tor str. N16961" [GO:0003674 "molecular_function" evidence=ND] [GO:0005575 "cellular_component" evidence=ND] [GO:0008150 "biological_process" evidence=ND] GO:GO:0016021 Proteomes:UP000000584 GO:GO:0008047 EMBL:AE003853 eggNOG:COG0790 InterPro:IPR006597 SMART:SM00671 KO:K07126 Pfam:PF08238 PIR…	385	1	349	90.65	318.5	2e-85	165/349	47	223/349	63	0/349	0	1
gene4885	NC_004605.1	1757631	1758839	+	protein_coding	VPA1647	.	1192343	.	NP_801157.1	multidrug resistance protein D	2.23636	5.04472	9.06217e-05	0.000818874	5.50824	4.38436	4.38436	5.50824	60	171	14.5671	41.5684	1209	28	1150	92.89	UNIPROTKB|Q9KN82 - symbol:VC_A0083 "Multidrug resistance protein D" species:243277 "Vibrio cholerae O1 biovar El Tor str. N16961" [GO:0006855 "drug transmembrane transport" evidence=ISS] [GO:0042493 "response to drug" evidence=ISS] InterPro:IPR011701 Pfam:PF07690 GO:GO:0016021 GO:GO:0042493 Proteomes:UP000000584 GO:GO:0006855 CDD:cd06174 InterPro:IPR020846 InterPro:IPR036259 SUPFAM:SSF103473 EMBL…	403	14	386	92.56	245	2e-63	130/374	34	217/374	58	1/374	0	1
gene4888	NC_004605.1	1762487	1765234	-	protein_coding	VPA1650	.	1192346	.	NP_801160.1	insulinase family zinc protease	-2.03897	6.16937	3.18278e-05	0.000321839	5.58848	6.60153	6.60153	5.58848	290	181	30.9763	19.3578	2748	1	2743	99.82	UNIPROTKB|Q9KRD3 - symbol:VC_1709 "Zinc protease, insulinase family" species:243277 "Vibrio cholerae O1 biovar El Tor str. N16961" [GO:0004222 "metalloendopeptidase activity" evidence=IBA] [GO:0006508 "proteolysis" evidence=ISS] [GO:0008233 "peptidase activity" evidence=ISS] [GO:0008270 "zinc ion binding" evidence=IBA] [GO:0016485 "protein processing" evidence=IBA] InterPro:IPR001431 InterPro:IPR…	922	3	916	99.13	627.9	3e-178	334/916	36	508/916	55	4/916	0	1
gene4894	NC_004605.1	1771450	1773588	-	protein_coding	VPA1656	.	1192352	.	NP_801166.1	ferric vibrioferrin receptor	-2.84124	5.74974	1.18853e-08	2.26353e-07	4.85069	6.32565	6.32565	4.85069	239	107	32.7971	14.7017	2139	16	2137	99.21	UNIPROTKB|P13036 - symbol:fecA "ferric citrate outer membrane transporter" species:83333 "Escherichia coli K-12" [GO:0015091 "ferric iron transmembrane transporter activity" evidence=IMP] [GO:0015682 "ferric iron transport" evidence=IMP] [GO:0009279 "cell outer membrane" evidence=IDA] InterPro:IPR010105 InterPro:IPR011662 Pfam:PF07660 SMART:SM00965 EcoGene:EG10286 InterPro:IPR000531 InterPro:IPR0…	774	73	774	90.7	334.7	4e-90	228/726	31	349/726	48	43/726	5	1
gene4895	NC_004605.1	1773711	1775747	-	protein_coding	VPA1657	.	1192353	.	NP_801167.1	ferric siderophore receptor-like protein	-4.54055	6.91464	3.53924e-19	1.68889e-17	5.47485	7.63314	7.63314	5.47485	596	167	85.8823	24.0946	2037	166	2035	91.8	UNIPROTKB|Q4KJX7 - symbol:PFL_0310 "TonB-dependent outermembrane receptor" species:220664 "Pseudomonas protegens Pf-5" [GO:0015343 "siderophore transmembrane transporter activity" evidence=ISM] [GO:0019867 "outer membrane" evidence=ISM] InterPro:IPR010105 InterPro:IPR030148 InterPro:IPR000531 InterPro:IPR012910 Pfam:PF00593 Pfam:PF07715 GO:GO:0016021 GO:GO:0005506 GO:GO:0009279 GO:GO:0004872 EMBL…	699	53	699	92.56	204.9	4e-51	188/661	28	296/661	44	52/661	7	1
gene4896	NC_004605.1	1775995	1777206	+	protein_coding	VPA1658	.	1192354	.	NP_801168.1	hypothetical protein	-2.12838	6.58573	4.81454e-06	5.67981e-05	5.95825	7.0361	7.0361	5.95825	393	235	95.1784	56.9848	1212	40	832	65.43	UNIPROTKB|Q88B31 - symbol:PSPTO_0200 "Uncharacterized protein" species:223283 "Pseudomonas syringae pv. tomato str. DC3000" [GO:0003674 "molecular_function" evidence=ND] [GO:0005575 "cellular_component" evidence=ND] [GO:0008150 "biological_process" evidence=ND] InterPro:IPR011761 InterPro:IPR013815 PROSITE:PS50975 GO:GO:0005524 GO:GO:0003824 GO:GO:0046872 eggNOG:COG0439 Gene3D:3.30.1490.20 EMBL:A…	405	7	279	67.41	64.3	6e-09	80/280	28	126/280	45	23/280	8	1
gene4897	NC_004605.1	1777203	1779035	+	protein_coding	VPA1659	.	1192355	.	NP_801169.1	hypothetical protein	-2.27724	4.38329	0.000406563	0.0030944	3.75437	4.8827	4.8827	3.75437	86	48	13.7716	7.69614	1833	445	1333	48.5	UNIPROTKB|Q81RQ9 - symbol:asbA "Petrobactin biosynthesis protein AsbA" species:1392 "Bacillus anthracis" [GO:0003824 "catalytic activity" evidence=ISS] [GO:0019290 "siderophore biosynthetic process" evidence=ISS] InterPro:IPR007310 InterPro:IPR037455 Pfam:PF04183 Pfam:PF06276 GO:GO:0003824 EMBL:AE017334 Proteomes:UP000000594 GO:GO:0019290 InterPro:IPR022770 PANTHER:PTHR34384 eggNOG:COG4264 RefSeq…	602	145	467	53.65	62	4e-08	79/342	23	143/342	41	65/342	19	1
gene4902	NC_004605.1	1784564	1785994	-	protein_coding	VPA1664	.	1192360	.	NP_801174.1	two-component sensor	6.38073	1.71053	0.0103193	0.0469606	2.43972	0.73363	0.73363	2.43972	2	17	0.410241	3.49143	1431	25	1426	97.97	UNIPROTKB|Q48MC5 - symbol:PSPPH_1180 "Sensor histidine kinase" species:264730 "Pseudomonas savastanoi pv. phaseolicola 1448A" [GO:0000155 "phosphorelay sensor kinase activity" evidence=ISM] [GO:0000160 "phosphorelay signal transduction system" evidence=ISM] InterPro:IPR003660 InterPro:IPR003661 InterPro:IPR004358 InterPro:IPR036097 Pfam:PF00512 Pfam:PF00672 PRINTS:PR00344 PROSITE:PS50885 SMART:SM…	486	14	483	96.71	400.2	5e-110	205/470	43	311/470	66	3/470	0	1
gene4916	NC_004605.1	1799737	1800576	+	protein_coding	VPA1678	.	1192374	.	NP_801188.1	DNA-binding transcriptional regulator AraC	2.14317	6.48199	5.51178e-06	6.4133e-05	6.92822	5.84146	5.84146	6.92822	170	464	59.4043	162.343	840	13	832	97.62	UNIPROTKB|Q7CIK1 - symbol:araC "Arabinose operon regulatory protein" species:632 "Yersinia pestis" [GO:0000987 "proximal promoter sequence-specific DNA binding" evidence=IBA] [GO:0003700 "DNA binding transcription factor activity" evidence=IBA] [GO:0005829 "cytosol" evidence=IBA] [GO:0006355 "regulation of transcription, DNA-templated" evidence=IBA] [GO:0019172 "glyoxalase III activity" evidence=…	310	12	284	88.06	278.9	1e-73	132/273	48	183/273	67	0/273	0	1
gene4921	NC_004605.1	1803624	1804181	+	protein_coding	VPA1683	.	1192379	.	NP_801193.1	alkyl hydroperoxide reductase	3.32301	8.12751	9.98482e-15	3.6244e-13	8.74645	7.02146	7.02146	8.74645	389	1646	204.627	866.941	558	1	556	99.64	UNIPROTKB|P0AE08 - symbol:ahpC species:83333 "Escherichia coli K-12" [GO:0004601 "peroxidase activity" evidence=IGI] [GO:0005737 "cytoplasm" evidence=IDA] [GO:0009970 "cellular response to sulfate starvation" evidence=IDA] [GO:0032843 "hydroperoxide reductase activity" evidence=IDA] [GO:0016684 "oxidoreductase activity, acting on peroxide as acceptor" evidence=IMP] [GO:0045454 "cell redox homeost…	187	3	187	98.93	316.6	3e-85	146/185	78	167/185	90	0/185	0	1
gene4922	NC_004605.1	1804339	1805907	+	protein_coding	VPA1684	.	1192380	.	NP_801194.1	alkyl hydroperoxide reductase	8.50018	7.85238	1.82508e-36	2.9812e-34	8.68846	5.62602	5.62602	8.68846	146	1581	27.3136	296.144	1569	1	1561	99.49	UNIPROTKB|Q47V12 - symbol:ahpF "Alkyl hydroperoxide reductase, F subunit" species:167879 "Colwellia psychrerythraea 34H" [GO:0008785 "alkyl hydroperoxide reductase activity" evidence=ISA] InterPro:IPR000103 InterPro:IPR002109 InterPro:IPR008255 InterPro:IPR012081 InterPro:IPR023753 Pfam:PF07992 PIRSF:PIRSF000238 PRINTS:PR00469 PROSITE:PS00573 PROSITE:PS51354 GO:GO:0051287 GO:GO:0009055 GO:GO:0050…	523	1	521	99.62	671	2e-191	347/524	66	403/524	76	7/524	1	1
gene4923	NC_004605.1	1806249	1806668	+	protein_coding	VPA1685	.	1192381	.	NP_801195.1	lactoylglutathione lyase	2.50527	3.63481	0.00149259	0.00937726	4.14243	2.93134	2.93134	4.14243	20	64	13.9775	44.7842	420	1	409	97.38	TIGR_CMR|SO_3586 - symbol:SO_3586 "glyoxalase family protein" species:211586 "Shewanella oneidensis MR-1" [GO:0003824 "catalytic activity" evidence=ISS] [GO:0008152 "metabolic process" evidence=ISS] EMBL:AE014299 Proteomes:UP000008186 Gene3D:3.10.180.10 InterPro:IPR029068 InterPro:IPR037523 SUPFAM:SSF54593 PROSITE:PS51819 HOGENOM:HOG000232025 eggNOG:ENOG4108VBD eggNOG:ENOG4111JCZ OMA:HQVGLAH Orth…	138	1	136	98.55	203	3e-51	91/136	66	110/136	80	0/136	0	1
gene4935	NC_004605.1	1815516	1816349	-	protein_coding	VPA1697	.	1192393	.	NP_801207.1	transcriptional regulator	3.86442	2.27087	0.00429585	0.0228056	2.90841	1.40982	1.40982	2.90841	5	25	1.75975	8.80984	834	58	808	90.05	UNIPROTKB|Q47Y50 - symbol:CPS_3602 "Transcriptional regulator, araC family" species:167879 "Colwellia psychrerythraea 34H" [GO:0003700 "DNA binding transcription factor activity" evidence=ISM] [GO:0006355 "regulation of transcription, DNA-templated" evidence=ISM] InterPro:IPR003313 InterPro:IPR009057 InterPro:IPR018060 InterPro:IPR018062 InterPro:IPR020449 Pfam:PF02311 Pfam:PF12833 PRINTS:PR00032…	268	17	265	92.91	134.8	2e-30	79/254	31	135/254	53	9/254	3	1
gene4940	NC_004605.1	1820863	1821846	-	protein_coding	VPA1702	.	1192398	.	NP_801212.1	dicarboxylate-binding periplasmic protein	3.85179	6.45698	1.80393e-14	6.49261e-13	7.11861	5.20133	5.20133	7.11861	108	530	32.2164	158.298	984	61	982	93.7	UNIPROTKB|P37676 - symbol:yiaO species:83333 "Escherichia coli K-12" [GO:0006974 "cellular response to DNA damage stimulus" evidence=IEP] [GO:0030246 "carbohydrate binding" evidence=IDA] [GO:0034219 "carbohydrate transmembrane transport" evidence=IDA] [GO:0030288 "outer membrane-bounded periplasmic space" evidence=ISS] InterPro:IPR004682 InterPro:IPR018389 Pfam:PF03480 PIRSF:PIRSF006470 EMBL:U000…	328	19	328	94.51	166.8	7e-40	96/310	30	168/310	54	3/310	0	1
gene4941	NC_004605.1	1822162	1822683	+	protein_coding	VPA1703	.	1192399	.	NP_801213.1	small integral C4-dicarboxylate membrane transport protein	3.14489	7.00811	3.3492e-12	9.8097e-11	7.60686	5.96906	5.96906	7.60686	186	745	104.59	419.45	522	4	433	82.38	UNIPROTKB|Q3ACJ8 - symbol:CHY_1302 "TRAP dicarboxylate transporter, DctQ subunit" species:246194 "Carboxydothermus hydrogenoformans Z-2901" [GO:0015556 "C4-dicarboxylate transmembrane transporter activity" evidence=ISM] [GO:0015740 "C4-dicarboxylate transport" evidence=ISM] Pfam:PF04290 GO:GO:0016021 EMBL:CP000141 Proteomes:UP000002706 eggNOG:COG3090 InterPro:IPR007387 PANTHER:PTHR35011 OrthoDB:P…	167	10	148	83.23	73.2	5e-12	40/143	27	74/143	51	4/143	2	1
gene4942	NC_004605.1	1822695	1823996	+	protein_coding	VPA1704	.	1192400	.	NP_801214.1	integral membrane protein transporter	5.06614	7.85992	1.24315e-23	7.99951e-22	8.59734	6.27098	6.27098	8.59734	230	1484	51.852	334.978	1302	16	1294	98.23	TIGR_CMR|SPO_1719 - symbol:SPO_1719 "TRAP dicarboxylate transporter, DctM subunit" species:246200 "Ruegeria pomeroyi DSS-3" [GO:0015556 "C4-dicarboxylate transmembrane transporter activity" evidence=ISS] [GO:0015740 "C4-dicarboxylate transport" evidence=ISS] InterPro:IPR004681 PIRSF:PIRSF006066 Pfam:PF06808 GO:GO:0016021 EMBL:CP000031 Proteomes:UP000001023 eggNOG:COG1593 eggNOG:ENOG4105CG6 InterP…	425	3	424	99.29	327.8	3e-88	178/427	41	267/427	62	6/427	1	1
gene4943	NC_004605.1	1824048	1825514	+	protein_coding	VPA1705	.	1192401	.	NP_801215.1	mannonate oxidoreductase	2.88299	3.70774	0.000192791	0.00160232	4.2647	2.86726	2.86726	4.2647	19	70	3.80165	14.0237	1467	1	1462	99.66	UNIPROTKB|P39160 - symbol:uxuB "D-mannonate oxidoreductase" species:83333 "Escherichia coli K-12" [GO:0042840 "D-glucuronate catabolic process" evidence=IMP] [GO:0008866 "fructuronate reductase activity" evidence=IDA;IMP] InterPro:IPR000669 InterPro:IPR008927 InterPro:IPR013118 InterPro:IPR013131 InterPro:IPR013328 InterPro:IPR023027 Pfam:PF01232 Pfam:PF08125 PRINTS:PR00084 PROSITE:PS00974 EcoGen…	486	1	486	100	635.6	7e-181	317/489	64	377/489	77	5/489	1	1
gene4963	NC_004605.1	1841811	1842518	-	protein_coding	VPA1725	.	1192421	.	NP_801235.1	hypothetical protein	2.17518	8.82948	1.58938e-07	2.49081e-06	9.28345	8.16494	8.16494	9.28345	863	2390	357.788	992.107	708	1	706	99.72	UNIPROTKB|Q9KKN0 - symbol:VC_A1072 "Uncharacterized protein" species:243277 "Vibrio cholerae O1 biovar El Tor str. N16961" [GO:0003674 "molecular_function" evidence=ND] [GO:0005575 "cellular_component" evidence=ND] [GO:0008150 "biological_process" evidence=ND] InterPro:IPR016161 InterPro:IPR016162 GO:GO:0016491 Proteomes:UP000000584 Gene3D:3.40.605.10 SUPFAM:SSF53720 EMBL:AE003853 PIR:A82383 RefS…	232	1	232	100	297.7	2e-79	156/235	66	180/235	76	3/235	1	1
gene4964	NC_004605.1	1842530	1845661	-	protein_coding	VPA1726	.	1192422	.	NP_801236.1	bifunctional proline dehydrogenase/pyrroline-5-carboxylate dehydrogenase	2.28364	9.48789	1.81085e-08	3.3293e-07	9.96367	8.77412	8.77412	9.96367	1318	3832	123.521	359.582	3132	1	3097	98.88	UNIPROTKB|Q8EAW7 - symbol:putA "Bifunctional protein PutA" species:211586 "Shewanella oneidensis MR-1" [GO:0003842 "1-pyrroline-5-carboxylate dehydrogenase activity" evidence=ISS;IBA] [GO:0004029 "aldehyde dehydrogenase (NAD) activity" evidence=IBA] [GO:0004657 "proline dehydrogenase activity" evidence=ISS;IBA] [GO:0006562 "proline catabolic process" evidence=ISS] InterPro:IPR005933 InterPro:IPR0…	1059	1	1032	97.45	1196	0	617/1038	59	768/1038	73	12/1038	1	1
gene4976	NC_004605.1	1860307	1860900	+	protein_coding	VPA1738	.	1192434	.	NP_801248.1	tryptophan repressor binding protein	3.63341	2.95382	0.000610301	0.00437958	3.57692	1.99374	1.99374	3.57692	9	42	4.44738	20.7805	594	10	574	95.12	UNIPROTKB|Q4K888 - symbol:wrbA "NAD(P)H:quinone oxidoreductase, type IV" species:220664 "Pseudomonas protegens Pf-5" [GO:0003955 "NAD(P)H dehydrogenase (quinone) activity" evidence=ISM] [GO:0055114 "oxidation-reduction process" evidence=ISM] InterPro:IPR001226 InterPro:IPR005025 InterPro:IPR008254 InterPro:IPR010089 Pfam:PF03358 PROSITE:PS00201 PROSITE:PS50902 InterPro:IPR029039 GO:GO:0009055 EMB…	201	6	196	95.02	85.9	9e-16	61/198	30	88/198	44	17/198	8	1
gene4978	NC_004605.1	1862737	1863447	+	protein_coding	VPA1740	.	1192436	.	NP_801250.1	murein peptide amidase A	2.28808	5.30482	2.2795e-05	0.000236123	5.77835	4.61648	4.61648	5.77835	71	207	29.3114	85.5647	711	13	703	97.19	UNIPROTKB|P0ACV6 - symbol:mpaA species:83333 "Escherichia coli K-12" [GO:0004040 "amidase activity" evidence=IGI] [GO:0009253 "peptidoglycan catabolic process" evidence=IGI;IMP] [GO:0061473 "murein tripeptide carboxypeptidase activity" evidence=IDA] [GO:0008270 "zinc ion binding" evidence=IDA] [GO:0009050 "glycopeptide catabolic process" evidence=IMP] InterPro:IPR000834 Pfam:PF00246 GO:GO:0008270…	242	6	235	95.04	251.9	1e-65	127/230	55	153/230	66	0/230	0	1
gene4987	NC_004605.1	1870659	1872338	-	protein_coding	VPA1749	.	1192445	.	NP_801259.1	hypothetical protein	5.9051	9.3768	2.338e-30	2.2567e-28	10.1501	7.59408	7.59408	10.1501	580	4361	101.337	762.906	1680	1	1669	99.35	UNIPROTKB|Q9KKL8 - symbol:VC_A1085 "Uncharacterized protein" species:243277 "Vibrio cholerae O1 biovar El Tor str. N16961" [GO:0003674 "molecular_function" evidence=ND] [GO:0005575 "cellular_component" evidence=ND] [GO:0008150 "biological_process" evidence=ND] InterPro:IPR036145 Proteomes:UP000000584 EMBL:AE003853 GO:GO:0000902 SUPFAM:SSF63848 eggNOG:ENOG4105FEG eggNOG:COG1315 KO:K09749 InterPro:…	556	1	554	99.64	635.2	1e-180	331/556	59	411/556	73	2/556	0	1

## Sheet: GO_Analysis
GO analysis result:
biological_process	195.035	Figure
cellular_component	71.2679	Figure
molecular_function	181.697	Figure
No Hits	76
biological_process	GO	Count	WeightedScore
	GO:0008152 metabolic process	112	37.43
	GO:0009296 obsolete flagellum assembly	2	1
	GO:0009987 cellular process	155	18.8567
	GO:0022610 biological adhesion	1	0.0833333
	GO:0023052 signaling	1	0.5
	GO:0040011 locomotion	33	10.125
	GO:0045718 obsolete negative regulation of flagellum assembly	1	0.5
	GO:0050896 response to stimulus	30	13.1583
	GO:0051179 localization	89	42.2821
	GO:0051704 multi-organism process	7	1.48333
	GO:0065007 biological regulation	54	20.9885
	GO:0071840 cellular component organization or biogenesis	15	2.25741
	GO:0098754 detoxification	2	0.0833333
	Unclassified Unclassified	129	46.2873
cellular_component	GO	Count	WeightedScore
	GO:0005576 extracellular region	1	0.25
	GO:0016020 membrane	26	4.83333
	GO:0031974 membrane-enclosed lumen	1	0.0125
	GO:0032991 protein-containing complex	19	2.36091
	GO:0043226 organelle	6	1.04583
	GO:0044421 extracellular region part	1	0.0208333
	GO:0044422 organelle part	24	4.10139
	GO:0044425 membrane part	24	5.46607
	GO:0044464 cell part	103	19.4175
	Unclassified Unclassified	106	33.7595
molecular_function	GO	Count	WeightedScore
	GO:0003824 catalytic activity	145	57.9794
	GO:0003840 obsolete gamma-glutamyltransferase activity	1	0.5
	GO:0004871 signal transducer activity	27	11.4167
	GO:0005198 structural molecule activity	29	11.5
	GO:0005215 transporter activity	73	28.046
	GO:0005488 binding	54	20.9286
	GO:0016209 antioxidant activity	4	0.483333
	GO:0016564 obsolete transcription repressor activity	1	0.5
	GO:0030508 obsolete thiol-disulfide exchange intermediate activity	1	0.5
	GO:0140104 molecular carrier activity	1	0.25
	GO:0140110 transcription regulator activity	17	7.08333
	Unclassified Unclassified	123	42.5095

## Sheet: GO_Analysis_list
GO analysis result:
biological_process	195.035	Figure
cellular_component	71.2679	Figure
molecular_function	181.697	Figure
No Hits	76
biological_process	GO	Count	WeightedScore	ContigID
	GO:0008152 metabolic process	112	37.43
				gene2271
				gene4415
				gene4964
				gene3160
				gene3072
				gene2175
				gene3765
				gene4858
				gene2443
				gene1184
				gene72
				gene4857
				gene3807
				gene4366
				gene1975
				gene542
				gene2083
				gene2082
				gene1977
				gene2089
				gene4641
				gene4978
				gene2479
				gene1306
				gene4976
				gene3928
				gene4085
				gene4644
				gene363
				gene362
				gene2945
				gene2946
				gene2947
				gene2948
				gene4004
				gene3815
				gene1573
				gene713
				gene4431
				gene4943
				gene886
				gene885
				gene4731
				gene4635
				gene1160
				gene3862
				gene1640
				gene615
				gene3343
				gene508
				gene740
				gene4897
				gene2287
				gene1329
				gene1328
				gene2802
				gene1063
				gene266
				gene4867
				gene2965
				gene1496
				gene1208
				gene4026
				gene1498
				gene2968
				gene476
				gene4397
				gene4888
				gene2335
				gene4923
				gene285
				gene2978
				gene4240
				gene866
				gene1210
				gene352
				gene4752
				gene3535
				gene3715
				gene1978
				gene2386
				gene3158
				gene2901
				gene2381
				gene998
				gene1735
				gene2865
				gene2864
				gene1209
				gene3525
				gene4806
				gene2982
				gene2983
				gene3859
				gene325
				gene4476
				gene3145
				gene3796
				gene4916
				gene2556
				gene936
				gene3063
				gene4359
				gene2845
				gene4705
				gene4661
				gene4660
				gene2493
				gene1516
				gene303
				gene302
				gene4292
	GO:0009296 obsolete flagellum assembly	2	1
				gene2299
				gene2289
	GO:0009987 cellular process	155	18.8567
				gene820
				gene821
				gene3378
				gene2271
				gene828
				gene4415
				gene4964
				gene3160
				gene3928
				gene2175
				gene1747
				gene1744
				gene1743
				gene1742
				gene1741
				gene1740
				gene4858
				gene2443
				gene1184
				gene72
				gene4857
				gene1180
				gene4366
				gene542
				gene2083
				gene2082
				gene1977
				gene2089
				gene4699
				gene818
				gene1306
				gene815
				gene817
				gene816
				gene811
				gene2860
				gene4085
				gene3862
				gene363
				gene362
				gene2945
				gene2946
				gene2947
				gene2948
				gene3815
				gene713
				gene2467
				gene4943
				gene4940
				gene886
				gene885
				gene4731
				gene2299
				gene4635
				gene1160
				gene3435
				gene4039
				gene90
				gene1640
				gene615
				gene3343
				gene508
				gene740
				gene4897
				gene2287
				gene1329
				gene1328
				gene2802
				gene2289
				gene1063
				gene266
				gene587
				gene1712
				gene2965
				gene1496
				gene1208
				gene1209
				gene1719
				gene4742
				gene1498
				gene4744
				gene4745
				gene2968
				gene476
				gene475
				gene4397
				gene2440
				gene2335
				gene1291
				gene1292
				gene285
				gene3807
				gene2034
				gene2978
				gene4240
				gene4456
				gene866
				gene1210
				gene1707
				gene4280
				gene352
				gene4752
				gene1708
				gene3535
				gene1424
				gene2288
				gene2964
				gene1978
				gene3494
				gene2386
				gene3158
				gene2901
				gene2381
				gene998
				gene1737
				gene2861
				gene1735
				gene2865
				gene2864
				gene4026
				gene3145
				gene3525
				gene2982
				gene2983
				gene3859
				gene325
				gene3994
				gene4743
				gene1969
				gene4978
				gene4921
				gene2479
				gene3909
				gene3796
				gene3412
				gene830
				gene4916
				gene936
				gene4902
				gene3063
				gene4359
				gene1957
				gene1750
				gene303
				gene2312
				gene4661
				gene2493
				gene537
				gene3835
				gene2311
				gene2313
				gene302
				gene4292
				gene2314
				gene2316
	GO:0022610 biological adhesion	1	0.0833333
				gene3525
	GO:0023052 signaling	1	0.5
				gene3435
	GO:0040011 locomotion	33	10.125
				gene820
				gene821
				gene3977
				gene828
				gene433
				gene2034
				gene2297
				gene2932
				gene2299
				gene193
				gene3826
				gene1425
				gene4687
				gene830
				gene818
				gene815
				gene814
				gene817
				gene816
				gene811
				gene813
				gene2285
				gene2284
				gene3494
				gene1953
				gene2289
				gene1096
				gene1095
				gene2311
				gene2313
				gene2312
				gene2314
				gene2316
	GO:0045718 obsolete negative regulation of flagellum assembly	1	0.5
				gene811
	GO:0050896 response to stimulus	30	13.1583
				gene4921
				gene4699
				gene3700
				gene4885
				gene2817
				gene1747
				gene3319
				gene4146
				gene4038
				gene3802
				gene3535
				gene424
				gene3711
				gene4428
				gene3594
				gene4253
				gene4525
				gene4085
				gene2901
				gene3750
				gene2962
				gene1220
				gene1221
				gene1059
				gene43
				gene4656
				gene3835
				gene1222
				gene4940
				gene86
	GO:0051179 localization	89	42.2821
				gene3379
				gene3272
				gene3888
				gene1744
				gene1743
				gene1742
				gene1741
				gene4697
				gene311
				gene70
				gene71
				gene4280
				gene3594
				gene4082
				gene4722
				gene3757
				gene3750
				gene1303
				gene4175
				gene4174
				gene3563
				gene3187
				gene3425
				gene803
				gene4942
				gene2462
				gene4940
				gene4941
				gene2504
				gene4733
				gene4304
				gene4038
				gene4039
				gene1740
				gene4422
				gene4429
				gene4894
				gene4253
				gene3224
				gene3225
				gene1712
				gene1719
				gene4659
				gene4696
				gene2440
				gene4698
				gene4699
				gene4885
				gene4456
				gene2974
				gene4324
				gene1707
				gene1214
				gene1708
				gene1423
				gene3712
				gene3711
				gene3659
				gene4444
				gene3653
				gene3651
				gene3656
				gene3655
				gene3654
				gene1737
				gene2861
				gene2860
				gene4040
				gene2231
				gene3859
				gene326
				gene2548
				gene2547
				gene3700
				gene3144
				gene3319
				gene4673
				gene3412
				gene4113
				gene1241
				gene1750
				gene3383
				gene3382
				gene3384
				gene4660
				gene43
				gene3835
				gene3466
				gene305
	GO:0051704 multi-organism process	7	1.48333
				gene1735
				gene1220
				gene1221
				gene1222
				gene1180
				gene2817
				gene4672
	GO:0065007 biological regulation	54	20.9885
				gene3378
				gene2440
				gene1291
				gene1292
				gene4935
				gene2034
				gene2747
				gene1969
				gene3887
				gene4457
				gene1747
				gene2964
				gene4921
				gene4916
				gene2901
				gene3802
				gene1709
				gene4016
				gene77
				gene2082
				gene90
				gene3412
				gene2287
				gene615
				gene3377
				gene2669
				gene2479
				gene2735
				gene2718
				gene587
				gene4661
				gene2860
				gene4257
				gene4359
				gene3892
				gene1956
				gene1957
				gene1750
				gene1424
				gene1711
				gene2861
				gene1735
				gene1715
				gene1716
				gene45
				gene1059
				gene3585
				gene3525
				gene537
				gene4902
				gene3994
				gene3909
				gene2971
				gene4525
	GO:0071840 cellular component organization or biogenesis	15	2.25741
				gene615
				gene4743
				gene1707
				gene2440
				gene2271
				gene2467
				gene4742
				gene2864
				gene4744
				gene1180
				gene2968
				gene4745
				gene2978
				gene1329
				gene4731
	GO:0098754 detoxification	2	0.0833333
				gene4752
				gene4921
	Unclassified Unclassified	129	46.2873
				gene3277
				gene4643
				gene4963
				gene3072
				gene2173
				gene3600
				gene1946
				gene943
				gene1252
				gene312
				gene313
				gene310
				gene3802
				gene4017
				gene1503
				gene1507
				gene3191
				gene3198
				gene810
				gene4085
				gene3110
				gene4088
				gene899
				gene4173
				gene1172
				gene4177
				gene4176
				gene4848
				gene1476
				gene1308
				gene4432
				gene3353
				gene808
				gene809
				gene2468
				gene1102
				gene106
				gene16
				gene2055
				gene4731
				gene4732
				gene1164
				gene4148
				gene94
				gene1434
				gene2320
				gene615
				gene2326
				gene508
				gene4896
				gene746
				gene3226
				gene2485
				gene1289
				gene3778
				gene4863
				gene1494
				gene4028
				gene1202
				gene2595
				gene89
				gene1654
				gene1657
				gene2217
				gene84
				gene2336
				gene3235
				gene512
				gene4164
				gene3648
				gene596
				gene4455
				gene876
				gene2973
				gene2038
				gene4067
				gene2977
				gene1211
				gene358
				gene1549
				gene4165
				gene3524
				gene4811
				gene3536
				gene3188
				gene4682
				gene526
				gene3658
				gene3152
				gene4444
				gene3657
				gene2381
				gene998
				gene999
				gene1636
				gene3144
				gene2981
				gene1530
				gene2504
				gene1988
				gene3431
				gene2390
				gene1968
				gene2651
				gene3311
				gene2399
				gene2398
				gene2854
				gene4264
				gene1273
				gene3836
				gene1447
				gene1442
				gene3260
				gene939
				gene4460
				gene159
				gene2647
				gene1813
				gene1810
				gene2164
				gene3380
				gene3385
				gene4987
				gene44
				gene4875
				gene2493
				gene1062
				gene2093
cellular_component	GO	Count	WeightedScore	ContigID
	GO:0005576 extracellular region	1	0.25
				gene4415
	GO:0016020 membrane	26	4.83333
				gene4673
				gene4921
				gene2271
				gene803
				gene2547
				gene3144
				gene2817
				gene3802
				gene3355
				gene4699
				gene4894
				gene4895
				gene3778
				gene4525
				gene4113
				gene4444
				gene4724
				gene3381
				gene4175
				gene1498
				gene3525
				gene537
				gene3835
				gene1432
				gene3859
				gene4240
	GO:0031974 membrane-enclosed lumen	1	0.0125
				gene4731
	GO:0032991 protein-containing complex	19	2.36091
				gene266
				gene1708
				gene1496
				gene2865
				gene1209
				gene352
				gene1498
				gene285
				gene4026
				gene2864
				gene886
				gene339
				gene2982
				gene885
				gene3859
				gene1329
				gene3343
				gene2089
				gene4921
	GO:0043226 organelle	6	1.04583
				gene2865
				gene1180
				gene3525
				gene2297
				gene2165
				gene2902
	GO:0044421 extracellular region part	1	0.0208333
				gene3525
	GO:0044422 organelle part	24	4.10139
				gene820
				gene821
				gene825
				gene826
				gene828
				gene285
				gene4731
				gene339
				gene830
				gene818
				gene815
				gene817
				gene816
				gene1329
				gene3494
				gene266
				gene2864
				gene2311
				gene2310
				gene2313
				gene2312
				gene2314
				gene3501
				gene2316
	GO:0044425 membrane part	24	5.46607
				gene2440
				gene4697
				gene2271
				gene4698
				gene3700
				gene886
				gene4240
				gene885
				gene3425
				gene70
				gene71
				gene3272
				gene1423
				gene1525
				gene3308
				gene3594
				gene4082
				gene4722
				gene1303
				gene1496
				gene1208
				gene1498
				gene1096
				gene3859
	GO:0044464 cell part	103	19.4175
				gene820
				gene821
				gene825
				gene826
				gene2271
				gene828
				gene3160
				gene3072
				gene3765
				gene4697
				gene4858
				gene70
				gene71
				gene72
				gene1180
				gene1976
				gene2082
				gene4916
				gene2089
				gene818
				gene815
				gene817
				gene816
				gene3594
				gene4082
				gene4722
				gene4724
				gene1306
				gene1220
				gene4004
				gene3425
				gene3355
				gene803
				gene4940
				gene2297
				gene886
				gene2817
				gene885
				gene4731
				gene615
				gene4805
				gene3343
				gene508
				gene4894
				gene1329
				gene266
				gene1496
				gene4026
				gene1498
				gene2968
				gene1096
				gene3502
				gene3501
				gene2440
				gene4698
				gene4699
				gene285
				gene2034
				gene2978
				gene4240
				gene866
				gene352
				gene4752
				gene1708
				gene3535
				gene1978
				gene3494
				gene4444
				gene3653
				gene2901
				gene2902
				gene1977
				gene2865
				gene2864
				gene3525
				gene1432
				gene4806
				gene2982
				gene3859
				gene2547
				gene3700
				gene3144
				gene4921
				gene2479
				gene4673
				gene339
				gene1525
				gene3308
				gene830
				gene3778
				gene4113
				gene2165
				gene303
				gene4705
				gene4661
				gene537
				gene3835
				gene2311
				gene2310
				gene2313
				gene2312
				gene2314
				gene2316
	Unclassified Unclassified	106	33.7595
				gene3277
				gene4643
				gene4963
				gene3072
				gene2173
				gene1102
				gene1252
				gene312
				gene313
				gene310
				gene3802
				gene4017
				gene1503
				gene3191
				gene810
				gene4085
				gene3110
				gene4088
				gene899
				gene1172
				gene4177
				gene4176
				gene4848
				gene1476
				gene1308
				gene4432
				gene808
				gene809
				gene2468
				gene1946
				gene106
				gene16
				gene2055
				gene4731
				gene4732
				gene1164
				gene4148
				gene94
				gene1434
				gene2320
				gene3431
				gene2326
				gene4896
				gene746
				gene3226
				gene876
				gene1289
				gene4863
				gene1494
				gene4028
				gene89
				gene1654
				gene1657
				gene2217
				gene84
				gene2336
				gene3235
				gene512
				gene4164
				gene3648
				gene596
				gene4455
				gene2973
				gene2977
				gene1211
				gene358
				gene1549
				gene4165
				gene1636
				gene3188
				gene526
				gene3152
				gene4444
				gene999
				gene3524
				gene3144
				gene2981
				gene1530
				gene2504
				gene1988
				gene4476
				gene2390
				gene1968
				gene2651
				gene2399
				gene2398
				gene2854
				gene4264
				gene1273
				gene3836
				gene1447
				gene3260
				gene4460
				gene159
				gene2485
				gene2647
				gene1810
				gene2164
				gene3380
				gene3385
				gene4987
				gene44
				gene4875
				gene2493
				gene1062
				gene2093
molecular_function	GO	Count	WeightedScore	ContigID
	GO:0003824 catalytic activity	145	57.9794
				gene3378
				gene2271
				gene4415
				gene4964
				gene3160
				gene3072
				gene2175
				gene2174
				gene4364
				gene3888
				gene3767
				gene3765
				gene4921
				gene4858
				gene4922
				gene311
				gene4656
				gene1184
				gene72
				gene4857
				gene3807
				gene4366
				gene1975
				gene1977
				gene2089
				gene4173
				gene4699
				gene2479
				gene1306
				gene1382
				gene1267
				gene3928
				gene363
				gene362
				gene2945
				gene2946
				gene2947
				gene2948
				gene4004
				gene3815
				gene1573
				gene713
				gene1676
				gene4431
				gene2467
				gene4943
				gene886
				gene885
				gene4731
				gene4733
				gene4635
				gene1160
				gene3862
				gene1640
				gene615
				gene3346
				gene4805
				gene3343
				gene508
				gene740
				gene4897
				gene3859
				gene3224
				gene2284
				gene2802
				gene2964
				gene1496
				gene1208
				gene1209
				gene1498
				gene4744
				gene4745
				gene2968
				gene3225
				gene476
				gene4397
				gene3502
				gene4888
				gene4696
				gene4697
				gene2443
				gene4923
				gene4698
				gene1292
				gene2978
				gene4240
				gene866
				gene1210
				gene4324
				gene1214
				gene352
				gene4752
				gene3535
				gene1424
				gene3715
				gene1978
				gene3653
				gene3651
				gene3158
				gene2901
				gene1976
				gene2381
				gene998
				gene1735
				gene4026
				gene3525
				gene4806
				gene2982
				gene2983
				gene1530
				gene326
				gene325
				gene3994
				gene4743
				gene2548
				gene2547
				gene4666
				gene4476
				gene4978
				gene4072
				gene1809
				gene4189
				gene1377
				gene4180
				gene3796
				gene4916
				gene424
				gene4641
				gene4976
				gene4902
				gene4359
				gene1957
				gene1241
				gene303
				gene4705
				gene4661
				gene4660
				gene2493
				gene2093
				gene3835
				gene1516
				gene3466
				gene302
				gene4292
				gene4672
	GO:0003840 obsolete gamma-glutamyltransferase activity	1	0.5
				gene3145
	GO:0004871 signal transducer activity	27	11.4167
				gene3378
				gene1291
				gene803
				gene1292
				gene433
				gene2034
				gene2932
				gene1424
				gene193
				gene3909
				gene4673
				gene3826
				gene90
				gene1425
				gene4687
				gene813
				gene587
				gene2284
				gene3977
				gene1957
				gene1953
				gene2964
				gene3412
				gene1096
				gene1095
				gene4902
				gene3994
	GO:0005198 structural molecule activity	29	11.5
				gene820
				gene821
				gene825
				gene826
				gene828
				gene285
				gene542
				gene339
				gene2083
				gene830
				gene818
				gene815
				gene816
				gene2309
				gene1329
				gene1328
				gene2386
				gene2165
				gene2902
				gene266
				gene2865
				gene2864
				gene2311
				gene2310
				gene2313
				gene2312
				gene2314
				gene3501
				gene2316
	GO:0005215 transporter activity	73	28.046
				gene4660
				gene3187
				gene2440
				gene3272
				gene803
				gene4698
				gene2547
				gene4942
				gene2462
				gene4941
				gene4722
				gene4697
				gene3144
				gene2504
				gene4456
				gene1721
				gene2548
				gene3888
				gene3767
				gene2974
				gene4733
				gene3379
				gene4324
				gene4304
				gene1214
				gene311
				gene70
				gene71
				gene4672
				gene3355
				gene1423
				gene1525
				gene3308
				gene4699
				gene4696
				gene4422
				gene3712
				gene3711
				gene4894
				gene4895
				gene3700
				gene3425
				gene4082
				gene3224
				gene3225
				gene4525
				gene4113
				gene4444
				gene3653
				gene3757
				gene3651
				gene1241
				gene4673
				gene3655
				gene3654
				gene3381
				gene3594
				gene3383
				gene3382
				gene1303
				gene4175
				gene4040
				gene4742
				gene4039
				gene537
				gene3835
				gene2231
				gene3802
				gene3859
				gene326
				gene3466
				gene4174
				gene305
	GO:0005488 binding	54	20.9286
				gene4888
				gene4921
				gene2271
				gene4415
				gene866
				gene4699
				gene4940
				gene4476
				gene4240
				gene4457
				gene1747
				gene1720
				gene1745
				gene4731
				gene1724
				gene4858
				gene1063
				gene1705
				gene4752
				gene1180
				gene3796
				gene2082
				gene707
				gene4916
				gene615
				gene4978
				gene2479
				gene2556
				gene3535
				gene936
				gene4867
				gene1978
				gene3659
				gene2860
				gene4257
				gene4359
				gene3653
				gene2901
				gene1977
				gene998
				gene2861
				gene1735
				gene1496
				gene1717
				gene4661
				gene2864
				gene1738
				gene1739
				gene3525
				gene1096
				gene3835
				gene3063
				gene4806
				gene3859
	GO:0016209 antioxidant activity	4	0.483333
				gene4656
				gene4752
				gene4921
				gene3535
	GO:0016564 obsolete transcription repressor activity	1	0.5
				gene2735
	GO:0030508 obsolete thiol-disulfide exchange intermediate activity	1	0.5
				gene2845
	GO:0140104 molecular carrier activity	1	0.25
				gene936
	GO:0140110 transcription regulator activity	17	7.08333
				gene4935
				gene2669
				gene2479
				gene45
				gene3909
				gene3377
				gene2718
				gene4016
				gene77
				gene2287
				gene2971
				gene3585
				gene3887
				gene3892
				gene1956
				gene4916
				gene4661
	Unclassified Unclassified	123	42.5095
				gene3277
				gene4643
				gene4963
				gene3072
				gene2173
				gene3600
				gene1946
				gene943
				gene1252
				gene312
				gene313
				gene310
				gene3802
				gene4017
				gene1503
				gene1507
				gene3191
				gene810
				gene4085
				gene3110
				gene4088
				gene899
				gene4644
				gene1172
				gene4177
				gene4176
				gene4848
				gene1476
				gene1308
				gene4432
				gene3353
				gene808
				gene809
				gene2468
				gene1102
				gene106
				gene16
				gene2055
				gene4731
				gene4732
				gene1164
				gene4148
				gene94
				gene1434
				gene2320
				gene3431
				gene2326
				gene4896
				gene746
				gene3226
				gene2485
				gene1289
				gene4863
				gene1494
				gene4028
				gene1202
				gene2595
				gene89
				gene1654
				gene1657
				gene2217
				gene84
				gene2336
				gene3235
				gene512
				gene4164
				gene3648
				gene596
				gene4455
				gene876
				gene2973
				gene2038
				gene4067
				gene2977
				gene1211
				gene358
				gene1549
				gene4165
				gene3524
				gene3188
				gene4682
				gene526
				gene3658
				gene3152
				gene4444
				gene3657
				gene3656
				gene4987
				gene999
				gene1636
				gene3144
				gene2981
				gene1530
				gene2504
				gene1988
				gene2390
				gene1969
				gene1968
				gene2651
				gene3311
				gene2399
				gene2398
				gene2854
				gene4264
				gene1273
				gene3836
				gene1447
				gene3260
				gene939
				gene4460
				gene159
				gene2647
				gene1813
				gene1810
				gene2164
				gene3380
				gene3385
				gene3384
				gene44
				gene4875
				gene2493
				gene1062
				gene2093
